# Supplementary material for: Fair National Carbon Accountability for past and future emissions
Source: Research Square preprint supplement (doi:10.21203/rs.3.rs-3655927/v1), 2023-12-08
Supplement: Supplementary file 1 [file 4ea780d849e5f1d9da66ece2.xlsx]

## Sheet: Big Table
	Population Mt								CO2 emissions (Mt)								1.5C - Carbon Debt, Excessive Claims and Fair National Carbon Accountability							2C - Carbon Debt, Excessive Claims and Fair National Carbon Accountability				CALCULATION COLUMNS
Countries	Aggregated population 1990-2021	Aggregated population 1990-2070	Aggregated population 2022-2070	Share of world population 2021	Share of world population 1990-2021	Share of world population 1990-2070	Share of world population 2022-2070	Net zero date	Total CO2 emissions 1990-2021	Future Carbon Claims: Planned emissions 2022-2070	Total emissions 1990-2070	Share of emissions 1990-2021	Share of emissions 2022-2070	Share of emissions 1990-2070	CO2 emissions 2021 (Mt)	Equal share of emissions 1990-2021	Equal share of 1.5C carbon budget 2022-2070	Carbon Debt = Equal share of emissions 1990-2021 minus actual emissions 1990-2021	Negative budget (Columns R-S)	Excessive Carbon Claim = Future carbon claims 2022-2070 minus Equal share of 1.5 budget	Total Excessive Carbon Claims for 1.5C = Carbon Debt 1990-2021 + Excessive Carbon Claims 2022-2070	Fair National Carbon Accountability = Responsibility for additional emission reductions or negative emissions to stay within the 1.5C budget (Mt)	FNCA per capita tonne CO2 avg pop 2022-2070	Equal share of 2C carbon budget 2022-2070	Excessive Carbon Claim: Future carbon claims 2022-2070 minus Equal share of 2.0 budget	Total excessive carbon claims for 2.0C = Carbon Debt 1990-2021 + Excessive carbon claims 2022-2070	FNCA 2.0C budget: Responsibility for additional emission reductions or negative emissions (Mt)	Fair national carbon accountability (FNCA) for the 1.5C budget (per cent)	Fair national carbon accountability (FNCA) for the 2.0C budget (per cent)
Argentina	1.24937e+06	3.70785e+06	2.45848e+06	0.00573366	0.00593828	0.00554451	0.00536376	2050	5077.12	3426.34	8503.46	0.00533581	0.0047779	0.0047779	186.448	5650.37	1410.67	-573.255	1983.93	2015.67	1442.42	1045.99	20.4222	4360.74	-934.396	-1507.65		0.00185056
Australia	664653	2.18881e+06	1.52416e+06	0.00327487	0.0031591	0.00327303	0.00332532	2050	11707.5	6263.94	17971.4	0.012304	0.00756304	0.0100977	391.187	3005.93	874.56	8701.54	-7826.98	5389.38	14090.9	10218.2	321.801	2703.49	3560.45	12262	313.934	0.018078	0.0206123
Brazil	5.91449e+06	1.69982e+07	1.10837e+07	0.0271461	0.0281116	0.0254182	0.0241819	2050	12250.3	8084.07	20334.4	0.0128745	0.00976065	0.0114254	488.881	26748.6	6359.83	-14498.3	20858.2	1724.24	-12774.1			19659.9	-11575.8	-26074.1
Canada	1.03898e+06	3.22238e+06	2.1834e+06	0.00482665	0.00493827	0.00481857	0.00476362	2050	17407.2	7186.02	24593.3	0.0182942	0.00867636	0.0138184	545.635	4698.85	1252.83	12708.4	-11455.5	5933.19	18641.6	13518.2	297.185	3872.82	3313.2	16021.6	410.188	0.0239163	0.0269321
Chile	518253	1.51106e+06	992807	0.00246212	0.00246326	0.00225955	0.00216605	2050	2024.46	1448.18	3472.64	0.00212761	0.00174852	0.0019512	85.447	2343.83	569.671	-319.37	889.042	878.507	559.137	405.466	19.6034	1761	-312.821	-632.191		0.000717346
China	4.16977e+07	1.06036e+08	6.43382e+07	0.181017	0.198189	0.15856	0.140369	2060	208433	260121	468554	0.219053	0.314068	0.26327	11472.4	188581	36917.2	19852.4	17064.8	223204	243056	176256	131.497	114120	146001	165853	4246.21	0.31183	0.278797
Colombia	1.33886e+06	4.06073e+06	2.72188e+06	0.00650562	0.00636359	0.0060722	0.00593844	2050	2257.44	1561.33	3818.77	0.00237246	0.00188513	0.00214568	91.703	6055.07	1561.81	-3797.63	5359.44	-0.484028	-3798.11			4827.95	-3266.63	-7064.25
Costa Rica	135988	408169	272181	0.000652646	0.00064635	0.000610353	0.00059383	2050	204.505	130.15	334.655	0.000214925	0.000157142	0.000188035	7.82	615.013	156.177	-410.508	566.686	-26.0271	-436.536			482.784	-352.633	-763.142
Egypt	2.57366e+06	9.97084e+06	7.39719e+06	0.0137606	0.0122326	0.0149098	0.0161388	*2070	5337.55	9658.76	14996.3	0.00560951	0.0116619	0.00842609	249.624	11639.5	4244.5	-6301.98	10546.5	5414.26	-887.713			13120.8	-3462.06	-9764.04
Ethiopia	2.545e+06	1.23025e+07	9.75754e+06	0.0150748	0.0120964	0.0183965	0.0212885	2060	234.946	317.079	552.025	0.000246917	0.000382839	0.000310171	17.793	11509.9	5598.86	-11275	16873.8	-5281.78	-16556.7			17307.5	-16990.4	-28265.4
EU 27	1.38534e+07	3.46844e+07	2.08311e+07	0.0565183	0.0658452	0.0518652	0.045448	2050	110291	37123	147415	0.115911	0.0448221	0.0828289	2793.02	62652.8	11952.8	47638.6	-35685.8	25170.2	72808.8	52798.4	121.661	36949.3	173.794	47812.4	1224.1	0.0934103	0.0803722
Gambia	55272.3	266995	211723	0.000330959	0.000262709	0.00039925	0.000461925	2050	11.91	14.6409	26.5509	1.25169e-05	1.76773e-05	1.49183e-05	0.656	249.973	121.486	-238.063	359.549	-106.846	-344.908			375.545	-360.905	-598.967
India	3.66554e+07	1.15715e+08	7.90597e+07	0.178091	0.174223	0.173034	0.172488	2070	46678	91344	138022	0.0490563	0.110288	0.0775514	2709.68	165776	45364.4	-119098	164463	45979.7	-73118.8			140233	-48888.8	-167987
Indonesia	7.31196e+06	2.23748e+07	1.50628e+07	0.0346442	0.0347538	0.033458	0.0328632	2060	12184.9	24490	36674.9	0.0128058	0.029569	0.0206068	619.278	33068.8	8643.03	-20883.9	29526.9	15846.9	-5036.93			26717.8	-2227.84	-23111.7
Iran	2271225	6967788	4696563	0.0111198	0.0107951	0.0104192	0.0102467	*2070	15048	21343.1	36391.1	0.0158147	0.0257695	0.0204473	748.879	10271.8	2694.88	4776.24	-2081.36	18648.2	23424.4	16986.5	173.607	8330.57	13012.5	17788.7	455.431	0.0300524	0.0299027
Japan	4.04994e+06	9.29861e+06	5.24867e+06	0.0158624	0.0192494	0.0139046	0.0114513	2050	39055.3	15193	54248.3	0.0410453	0.0183439	0.0304809	1067.4	18316.1	3011.68	20739.2	-17727.5	12181.3	32920.5	23872.7	218.32	9309.87	5883.09	26622.3	681.589	0.0422354	0.0447518
Kazakhstan	534622	1.7359e+06	1.20128e+06	0.00242448	0.00254106	0.00259577	0.00262088	2060	7260.41	6404.52	13664.9	0.00763035	0.00773277	0.00767801	276.683	2417.86	689.291	4842.55	-4153.26	5715.23	10557.8	7656.12	305.92	2130.77	4273.74	9116.29	233.397	0.0135451	0.0153244
Kenya	1.1723e+06	5.06566e+06	3.89336e+06	0.00666647	0.00557194	0.00757491	0.00849431	*2070	353.236	666.515	1019.75	0.000371234	0.000804746	0.000572975	19.875	5301.8	2234	-4948.56	7182.57	-1567.49	-6516.05			6905.88	-6239.36	-11187.9
Mexico	3.35853e+06	1.01903e+07	6.83178e+06	0.0160451	0.0159631	0.015238	0.0149052	*2070	13579.4	14809.5	28389	0.0142713	0.0178809	0.0159511	407.205	15189.2	3920.07	-1609.75	5529.81	10889.5	9279.72	6729.32	47.2801	12117.9	2691.6	1081.86	27.698	0.0119054	0.00181859
Morocco	978221	3.10566e+06	2.12744e+06	0.00468313	0.00464949	0.00464403	0.00464153	*2070	1430.21	2320.18	3750.4	0.00150309	0.00280137	0.00210726	70.578	4424.07	1220.72	-2993.85	4214.58	1099.46	-1894.39			3773.56	-1453.38	-4447.23
New Zealand	132507	416584	284078	0.000646923	0.000629805	0.000622937	0.000619785	2050	1064.39	468.301	1532.7	0.00111863	0.000565424	0.000861187	33.79	599.27	163.003	465.124	-302.12	305.298	770.422	558.682	94.3994	503.885	-35.5838	429.54	10.9972	0.000988415	0.000722052
Nigeria	4.64039e+06	2.17474e+07	1.7107e+07	0.0267711	0.0220558	0.0325199	0.0373231	2060	2750.34	3219.9	5970.24	0.00289048	0.00388768	0.00335454	136.987	20986.4	9815.98	-18236.1	28052.1	-6596.08	-24832.2			30343.7	-27123.8	-45359.9
Norway	151410	454579	303169	0.000684495	0.000719655	0.000679753	0.000661437	2050	1349.12	407.951	1757.07	0.00141786	0.000492558	0.00098726	40.919	684.764	173.958	664.358	-490.4	233.993	898.352	651.452	103.143	537.748	-129.797	534.561	13.686	0.00115254	0.000898592
Peru	889820	2.86568e+06	1.97586e+06	0.00425537	0.00422932	0.00428517	0.00431081	2050	1194.33	1410.61	2604.94	0.00125518	0.00170316	0.00146366	56.282	4024.27	1133.74	-2829.94	3963.68	276.866	-2553.07			3504.69	-2094.08	-4924.02
Philippines	2.76365e+06	1.01007e+07	7.33709e+06	0.0143577	0.0131356	0.0151041	0.0160077	*2070	2673.99	5027.9	7701.89	0.00281024	0.00607065	0.00432752	144.264	12498.8	4210.02	-9824.79	14034.8	817.883	-9006.91			13014.2	-7986.33	-17811.1
Russia	4.66443e+06	1.12563e+07	6.59189e+06	0.0184682	0.0221701	0.0168321	0.0143818	2060	53566.6	45075	98641.6	0.056296	0.0544232	0.0554245	1755.55	21095.2	3782.42	32471.4	-28689	41292.6	73764	53491	389.504	11692.4	33382.6	65854	1686.01	0.0946357	0.1107
Saudi Arabia	817960	3.05663e+06	2.23867e+06	0.00454038	0.00388777	0.00457071	0.0048842	2060	13724.5	15293.2	29017.7	0.0144238	0.0184649	0.0163044	672.38	3699.28	1284.54	10025.2	-8740.69	14008.6	24033.9	17428.5	373.69	3970.85	11322.3	21347.5	546.545	0.0308343	0.035885
Singapore	145169	450385	305216	0.000752351	0.000689988	0.000673481	0.000665904	2050	1470.31	1016.32	2486.63	0.00154523	0.00122709	0.00139718	32.507	656.536	175.133	813.778	-638.646	841.183	1654.96	1200.12	188.737	541.38	474.936	1288.71	32.9939	0.00212324	0.00216631
South Africa	1.58146e+06	5.03861e+06	3.45714e+06	0.00750771	0.0075167	0.00753446	0.0075426	2050	13157.3	6843.85	20001.1	0.0138277	0.00826322	0.0112382	435.929	7152.27	1983.7	6005.01	-4021.3	4860.14	10865.2	7879.02	109.395	6132.14	711.712	6716.72	171.963	0.0139395	0.0112907
South Korea	1.53604e+06	3.79963e+06	2.26358e+06	0.00658013	0.00730082	0.00568175	0.00493856	2050	16059.2	10043.8	26103	0.0168774	0.0121268	0.0146667	616.075	6946.85	1298.84	9112.33	-7813.49	8744.97	17857.3	12949.5	274.598	4015.05	6028.76	15141.1	387.645	0.0229101	0.025452
Switzerland	242478	710090	467611	0.00110078	0.0011525	0.00106183	0.00102021	2050	1356.64	575.146	1931.79	0.00142577	0.000694427	0.00108543	34.932	1096.62	268.315	260.019	8.29614	306.831	566.849	411.059	42.1949	829.429	-254.284	5.73496	0	0.000727241	9.64042e-06
Thailand	2.07916e+06	5.40447e+06	3.32531e+06	0.009085	0.00988226	0.00808155	0.00725498	2065	6918.41	7737.17	14655.6	0.00727092	0.00934181	0.00823464	278.496	9403.14	1908.06	-2484.74	4392.8	5829.11	3344.37	2425.22	35.0074	5898.3	1838.87	-645.865		0.00429067
Turkey	2209660	6761223	4551563	0.0107223	0.0105025	0.0101104	0.00993035	2050	9087.5	10583.3	19670.8	0.00955053	0.0127782	0.0110526	446.204	9993.33	2611.68	-905.831	3517.51	7971.58	7065.75	5123.83	54.035	8073.37	2509.89	1604.05	41.0674	0.00906502	0.0026964
United Arab Emirates	176067	718046	541979	0.00118409	0.000836848	0.00107373	0.00118246	*2070	4328.08	5639.86	9967.94	0.00454861	0.00680953	0.00560076	204.087	796.276	310.987	3531.81	-3220.82	5328.87	8860.68	6425.45	569.066	961.339	4678.52	8210.33	210.203	0.0113678	0.0138015
United Kingdom	1.96052e+06	5.42144e+06	3.46092e+06	0.00852715	0.00931836	0.00810692	0.00755085	2050	16406.1	4180.12	20586.2	0.017242	0.00504705	0.0115669	346.773	8866.58	1985.87	7539.49	-5553.61	2194.24	9733.73	7058.55	97.896	6138.84	-1958.72	5580.76	142.88	0.0124879	0.00938121
United States	9.45131e+06	2.74839e+07	1.80326e+07	0.0427191	0.0449221	0.0410979	0.0393424	2050	177814	68531.8	246346	0.186874	0.0827448	0.138416	5007.34	42744.2	10347.1	135070	-124723	58184.7	193255	140141	373.036	31985.4	36546.4	171616	4393.76	0.247937	0.288486
Vietnam	2.65084e+06	7.78005e+06	5.12921e+06	0.0123263	0.0125994	0.0116339	0.0111906	2050	3905.8	7573.64	11479.4	0.00410481	0.00914436	0.00645004	326.014	11988.6	2943.14	-8082.78	11025.9	4630.5	-3452.28		0	9097.99	-1524.35	-9607.13
								* meaning has no net zero target but 2070 is assumed											0							0	0
Rest of world	4.63826e+07	1.85465e+08	1.39082e+08	0.242931	0.220457	0.277334	0.303441	*2070	113863	122697	236561	0.119665	0.148144	0.132918	4305.17	209768	79805.1	-95904.8	175710	42892.3	-53012.5	0	0	246698	-124000	-219905	0
World	2.10393e+08	6.68742e+08	4.58349e+08	1	1	1	1		951517	828230	1.77975e+06	1	1	1	37123.9	951517	263000	0	263000	565230	565230	565230	59.193	813000	15230.4	15230.4	15230.4	1	1
Emissions 1990-2021		951517													Total overshoot for countries with overhoots				0		565230			813000		15230.4	15230.3
1. 5C Carbon budget 2022-2070		263000																	0
1.5C Carbon budget 1990-2070		1.21452e+06																	0	Total Excessive Carbon claims for countries with positive values	779452				Total Excessive Carbon claims for countries with positive values	594888
2C Carbon budget 2022-2070		813000																	0
2C Carbon budget 1990-2070		1.76452e+06																	0

## Sheet: Simple table for paper
Countries	GDP per capita 2021	Carbon Debt = Actual emissions 1990-2021 minus Equal share of emissions for 1.5C budget	Future Carbon Claims: Planned emissions 2022-2070	Excessive carbon claim = Future carbon claims 2022-2070 minus Equal share of 1.5C budget	Total excessive carbon claims for 1.5C = Carbon Debt 1990-2021 + Excessive carbon claims 2022-2070	Fair National Carbon Accountability for 1.5C = Responsibility for additional emission reductions or negative emissions (Mt)	Fair National Carbon Accountability per capita, average population 2022-2070 (t CO2)		Fair National Carbon Accountability per capita, average population 2022-2070 (t CO2)	Cost to cover FNCA if 100 USD per tonne in Share of 2021 GDP	Year of Net-Zero Target (NZT) *	Cost per year (NZT to 2100) as percentage of GDP (2021)	Military expenditures per year as percentage of GDP (2021)
Switzerland	92337.6	260.019	575.146	306.831	566.849	411.059	42.1949		Iran*	4.73035	2070	0.157678	0.0102
Norway	90934.4	664.358	407.951	233.993	898.352	651.452	103.143		Kazakhstan	3.88414	2060	0.0971036	0.0082
Singapore	71512.2	813.778	1016.32	841.183	1654.96	1200.12	188.737		Russia	2.91204	2060	0.072801	0.0359
United States	69287.9	135070	68531.8	58184.7	193255	140141	373.036		Saudi Arabia	2.00654	2060	0.0501634	0.0728
Australia	60191.8	8701.54	6263.94	5389.38	14090.9	10218.2	321.801		South Africa	1.88036	2050	0.0376073	0.0081
Canada	52644.1	12708.4	7186.02	5933.19	18641.6	13518.2	297.185		United Arab Emirates *	1.54822	2070	0.0516073	0.0548
New Zealand	50149.8	465.124	468.301	305.298	770.422	558.682	94.3994		China	0.989063	2060	0.0247266	0.016
United Kingdom	46487.8	7539.49	4180.12	2194.24	9733.73	7058.55	97.896		South Korea	0.715063	2050	0.0143013	0.0281
United Arab Emirates	44496.7	3531.81	5639.86	5328.87	8860.68	6425.45	569.066		Canada	0.675408	2050	0.0135082	0.0127
Japan	40061.4	20739.2	15193	12181.3	32920.5	23872.7	218.32		Australia	0.658093	2050	0.0131619	0.0211
EU 27	38607.9	47638.6	37123	25170.2	72808.8	52798.4	121.661		Turkey	0.625593	2050	0.0125119	0.019
South Korea	34939.5	9112.33	10043.8	8744.97	17857.3	12949.5	274.598		United States	0.601077	2050	0.0120215	0.0346
Saudi Arabia	24286.4	10025.2	15293.2	14008.6	24033.9	17428.5	373.69		Mexico *	0.528686	2070	0.0176229	0.0068
Chile	16330.5	-319.37	1448.18	878.507	559.137	405.466	19.6034		Thailand	0.479702	2065	0.0137058	0.0131
Russia	12627	32471.4	45075	41292.6	73764	53491	389.504		Japan	0.476927	2050	0.00953853	0.0102
Costa Rica	12569.2	-410.508	130.15	-26.0271	-436.536		0		EU 27	0.307184	2050	0.00614368	0.013
China	12498	19852.4	260121	223204	243056	176256	131.497		Singapore	0.283182	2050	0.00566365	0.0261
Argentina	10788	-573.255	3426.34	2015.67	1442.42	1045.99	20.4222		United Kingdom	0.226056	2050	0.00452112	0.0216
Kazakhstan	10321.4	4842.55	6404.52	5715.23	10557.8	7656.12	305.92		New Zealand	0.218618	2050	0.00437236	0.0114
Mexico	10071	-1609.75	14809.5	10889.5	9279.72	6729.32	47.2801		Argentina	0.214682	2050	0.00429365	0.0063
Turkey	9697.42	-905.831	10583.3	7971.58	7065.75	5123.83	54.035		Norway	0.13287	2050	0.0026574	0.0172
Brazil	7714.73	-14498.3	8084.07	1724.24	-12774.1		0		Chile	0.128023	2050	0.00256046	0.0193
South Africa	7085.42	6005.01	6843.85	4860.14	10865.2	7879.02	109.395		Switzerland	0.0513413	2050	0.00102683	0.0078
Thailand	7064.76	-2484.74	7737.17	5829.11	3344.37	2425.22	35.0074		Brazil	0	2050
Peru	6674.31	-2829.94	1410.61	276.866	-2553.07		0		Colombia	0	2050
Colombia	6215.56	-3797.63	1561.33	-0.484028	-3798.11		0		Costa Rica	0	2050
Indonesia	4347.92	-20883.9	24490	15846.9	-5036.93		0		Egypt*	0	2070
Iran	4099.75	4776.24	21343.1	18648.2	23424.4	16986.5	173.607		Ethiopia	0	2060
Egypt	3917.94	-6301.98	9658.76	5414.26	-887.713		0		Gambia	0	2050
Morocco	3872.91	-2993.85	2320.18	1099.46	-1894.39		0		India	0	2070
Vietnam	3770.97	-8082.78	7573.64	4630.5	-3452.28	0	0		Indonesia	0	2060
Philippines	3484.59	-9824.79	5027.9	817.883	-9006.91		0		Kenya*	0	2070
India	2245.72	-119098	91344	45979.7	-73118.8		0		Morocco*	0	2070
Nigeria	2090.5	-18236.1	3219.9	-6596.08	-24832.2		0		Nigeria	0	2060
Kenya	2089.14	-4948.56	666.515	-1567.49	-6516.05		0		Peru	0	2050
Ethiopia	936.994	-11275	317.079	-5281.78	-16556.7		0		Philippines*	0	2070
Gambia	781.918	-238.063	14.6409	-106.846	-344.908		0		Vietnam	0	2050
0		0	0	0	0	0	0			0
Rest of world		-95904.8	122697	42892.3	-53012.5	0	0		Rest of world	0
World		0	828230	565230	565230	565230	#REF!		World	0

## Sheet: 2022-2070 emissions projections
Country	Net zero date	Total CO2 emissions 1990-2021	Total emissions 2022-2070	Total emissions 1990-2070	Share of emissions 1990-2021	Share of emissions 2022-2070	Share of emissions 1990-2070	2021	2022	2023	2024	2025	2026	2027	2028	2029	2030	2031	2032	2033	2034	2035	2036	2037	2038	2039	2040	2041	2042	2043	2044	2045	2046	2047	2048	2049	2050	2051	2052	2053	2054	2055	2056	2057	2058	2059	2060	2061	2062
Argentina	2050	5077.12	3426.34	8503.46	0.00533581	0.0047779	0.0047779	186.448	186.272	186.096	185.921	185.745	185.569	185.393	185.217	185.041	184.866	175.622	166.379	157.136	147.893	138.649	129.406	120.163	110.919	101.676	92.4328	83.1896	73.9463	64.703	55.4597	46.2164	36.9731	27.7299	18.4866	9.24328	0
Australia	2050	11707.5	6263.94	17971.4	0.012304	0.00756304	0.0100977	391.187	383.731	376.275	368.819	361.363	353.907	346.451	338.995	331.538	324.082	307.878	291.674	275.47	259.266	243.062	226.858	210.654	194.449	178.245	162.041	145.837	129.633	113.429	97.2247	81.0206	64.8165	48.6124	32.4082	16.2041	0
Brazil	2050	12250.3	8084.07	20334.4	0.0128745	0.00976065	0.0114254	488.881	481.523	474.165	466.807	459.449	452.091	444.732	437.374	430.016	422.658	401.525	380.392	359.26	338.127	316.994	295.861	274.728	253.595	232.462	211.329	190.196	169.063	147.93	126.797	105.665	84.5316	63.3987	42.2658	21.1329	0
Canada	2050	17407.2	7186.02	24593.3	0.0182942	0.00867636	0.0138184	545.635	523.35	501.065	478.779	456.494	434.209	411.924	389.638	367.353	345.068	327.814	310.561	293.308	276.054	258.801	241.547	224.294	207.041	189.787	172.534	155.281	138.027	120.774	103.52	86.267	69.0136	51.7602	34.5068	17.2534	0
Chile	2050	2024.46	1448.18	3472.64	0.00212761	0.00174852	0.0019512	85.447	84.431	83.4149	82.3989	81.3829	80.3669	79.3508	78.3348	77.3188	76.3028	72.4876	68.6725	64.8574	61.0422	57.2271	53.4119	49.5968	45.7817	41.9665	38.1514	34.3362	30.5211	26.706	22.8908	19.0757	15.2606	11.4454	7.63028	3.81514	0
China	2060	208433	260121	468554	0.219053	0.314068	0.26327	11472.4	11418.4	11364.3	11310.3	11256.3	11202.3	11148.3	11094.3	11040.2	10986.2	10620	10253.8	9887.61	9521.4	9155.19	8788.99	8422.78	8056.57	7690.36	7324.15	6957.95	6591.74	6225.53	5859.32	5493.12	5126.91	4760.7	4394.49	4028.28	3662.08	3295.87	2929.66	2563.45	2197.25	1831.04	1464.83	1098.62	732.415	366.208	0
Colombia	2050	2257.44	1561.33	3818.77	0.00237246	0.00188513	0.00214568	91.703	90.6671	89.6313	88.5954	87.5596	86.5237	85.4878	84.452	83.4161	82.3802	78.2612	74.1422	70.0232	65.9042	61.7852	57.6662	53.5472	49.4281	45.3091	41.1901	37.0711	32.9521	28.8331	24.7141	20.5951	16.476	12.357	8.23802	4.11901	0
Costa Rica	2050	204.505	130.15	334.655	0.000214925	0.000157142	0.000188035	7.82	7.70874	7.59747	7.48621	7.37495	7.26368	7.15242	7.04116	6.92989	6.81863	6.4777	6.13677	5.79584	5.4549	5.11397	4.77304	4.43211	4.09118	3.75025	3.40932	3.06838	2.72745	2.38652	2.04559	1.70466	1.36373	1.02279	0.681863	0.340932	0
Egypt	*2070	5337.55	9658.76	14996.3	0.00560951	0.0116619	0.00842609	249.624	261.164	272.703	284.243	295.782	307.322	318.861	330.401	341.941	353.48	344.643	335.806	326.969	318.132	309.295	300.458	291.621	282.784	273.947	265.11	256.273	247.436	238.599	229.762	220.925	212.088	203.251	194.414	185.577	176.74	167.903	159.066	150.229	141.392	132.555	123.718	114.881	106.044	97.207	88.37	79.533	70.696
Ethiopia	2060	234.946	317.079	552.025	0.000246917	0.000382839	0.000310171	17.793	17.2172	16.6414	16.0655	15.4897	14.9139	14.3381	13.7623	13.1864	12.6106	12.1903	11.7699	11.3496	10.9292	10.5089	10.0885	9.66815	9.2478	8.82744	8.40709	7.98673	7.56638	7.14602	6.72567	6.30531	5.88496	5.46461	5.04425	4.6239	4.20354	3.78319	3.36283	2.94248	2.52213	2.10177	1.68142	1.26106	0.840709	0.420354	0
European Union (27)	2050	110291	37123	147415	0.115911	0.0448221	0.0828289	2793.02	2681.54	2570.06	2458.58	2347.11	2235.63	2124.15	2012.68	1901.2	1789.72	1700.24	1610.75	1521.26	1431.78	1342.29	1252.81	1163.32	1073.83	984.348	894.861	805.375	715.889	626.403	536.917	447.431	357.945	268.458	178.972	89.4861	0
Gambia	2050	11.91	14.6409	26.5509	1.25169e-05	1.76773e-05	1.49183e-05	0.656	0.675194	0.694389	0.713583	0.732778	0.751972	0.771167	0.790361	0.809556	0.82875	0.787312	0.745875	0.704437	0.663	0.621562	0.580125	0.538687	0.49725	0.455812	0.414375	0.372937	0.3315	0.290062	0.248625	0.207187	0.16575	0.124312	0.082875	0.0414375	0
India	2070	46678	91344	138022	0.0490563	0.110288	0.0775514	2709.68	2773.71	2837.74	2901.77	2965.79	3029.82	3093.85	3157.88	3221.9	3285.93	3203.78	3121.63	3039.49	2957.34	2875.19	2793.04	2710.89	2628.74	2546.6	2464.45	2382.3	2300.15	2218	2135.85	2053.71	1971.56	1889.41	1807.26	1725.11	1642.97	1560.82	1478.67	1396.52	1314.37	1232.22	1150.08	1067.93	985.779	903.631	821.483	739.334	657.186
Indonesia	2060	12184.9	24490	36674.9	0.0128058	0.029569	0.0206068	619.278	675.899	732.52	789.14	845.761	902.382	959.003	1015.62	1072.24	1128.87	1091.24	1053.61	1015.98	978.35	940.721	903.092	865.463	827.834	790.205	752.577	714.948	677.319	639.69	602.061	564.433	526.804	489.175	451.546	413.917	376.288	338.66	301.031	263.402	225.773	188.144	150.515	112.887	75.2577	37.6288	0
Iran	*2070	15048	21343.1	36391.1	0.0158147	0.0257695	0.0204473	748.879	748.879	748.879	748.879	748.879	748.879	748.879	748.879	748.879	748.879	730.157	711.435	692.713	673.991	655.269	636.547	617.825	599.103	580.381	561.659	542.937	524.215	505.493	486.771	468.049	449.327	430.605	411.883	393.161	374.439	355.718	336.996	318.274	299.552	280.83	262.108	243.386	224.664	205.942	187.22	168.498	149.776
Japan	2050	39055.3	15193	54248.3	0.0410453	0.0183439	0.0304809	1067.4	1032.5	997.606	962.711	927.815	892.919	858.023	823.128	788.232	753.336	715.669	678.002	640.336	602.669	565.002	527.335	489.668	452.002	414.335	376.668	339.001	301.334	263.668	226.001	188.334	150.667	113	75.3336	37.6668	0
Kazakhstan	2060	7260.41	6404.52	13664.9	0.00763035	0.00773277	0.00767801	276.683	276.127	275.572	275.016	274.46	273.904	273.349	272.793	272.237	271.681	262.625	253.569	244.513	235.457	226.401	217.345	208.289	199.233	190.177	181.121	172.065	163.009	153.953	144.897	135.841	126.785	117.729	108.673	99.6165	90.5604	81.5044	72.4483	63.3923	54.3363	45.2802	36.2242	27.1681	18.1121	9.05604	0
Kenya	*2070	353.236	666.515	1019.75	0.000371234	0.000804746	0.000572975	19.875	20.3289	20.7827	21.2366	21.6905	22.1443	22.5982	23.0521	23.5059	23.9598	23.3608	22.7618	22.1628	21.5638	20.9648	20.3658	19.7668	19.1678	18.5688	17.9699	17.3709	16.7719	16.1729	15.5739	14.9749	14.3759	13.7769	13.1779	12.5789	11.9799	11.3809	10.7819	10.1829	9.58392	8.98493	8.38593	7.78694	7.18794	6.58895	5.98995	5.39096	4.79196
Mexico	*2070	13579.4	14809.5	28389	0.0142713	0.0178809	0.0159511	407.205	421.736	436.268	450.799	465.331	479.862	494.394	508.925	523.457	537.988	524.539	511.089	497.639	484.189	470.74	457.29	443.84	430.391	416.941	403.491	390.042	376.592	363.142	349.692	336.243	322.793	309.343	295.894	282.444	268.994	255.544	242.095	228.645	215.195	201.746	188.296	174.846	161.396	147.947	134.497	121.047	107.598
Morocco	*2070	1430.21	2320.18	3750.4	0.00150309	0.00280137	0.00210726	70.578	71.978	73.3781	74.7781	76.1782	77.5782	78.9783	80.3783	81.7784	83.1784	81.099	79.0195	76.9401	74.8606	72.7811	70.7017	68.6222	66.5428	64.4633	62.3838	60.3044	58.2249	56.1455	54.066	51.9865	49.9071	47.8276	45.7481	43.6687	41.5892	39.5098	37.4303	35.3508	33.2714	31.1919	29.1125	27.033	24.9535	22.8741	20.7946	18.7152	16.6357
New Zealand	2050	1064.39	468.301	1532.7	0.00111863	0.000565424	0.000861187	33.79	32.5884	31.3867	30.1851	28.9834	27.7818	26.5802	25.3785	24.1769	22.9753	21.8265	20.6777	19.529	18.3802	17.2314	16.0827	14.9339	13.7852	12.6364	11.4876	10.3389	9.1901	8.04134	6.89258	5.74382	4.59505	3.44629	2.29753	1.14876	0
Nigeria	2060	2750.34	3219.9	5970.24	0.00289048	0.00388768	0.00335454	136.987	136.991	136.995	136.999	137.003	137.007	137.011	137.015	137.019	137.023	132.456	127.888	123.321	118.753	114.186	109.618	105.051	100.484	95.9162	91.3487	86.7813	82.2138	77.6464	73.079	68.5115	63.9441	59.3767	54.8092	50.2418	45.6744	41.1069	36.5395	31.9721	27.4046	22.8372	18.2697	13.7023	9.13487	4.56744	0
Norway	2050	1349.12	407.951	1757.07	0.00141786	0.000492558	0.00098726	40.919	38.2443	35.5696	32.8949	30.2201	27.5454	24.8707	22.196	19.5213	16.8466	16.0042	15.1619	14.3196	13.4772	12.6349	11.7926	10.9503	10.1079	9.26561	8.42328	7.58095	6.73862	5.8963	5.05397	4.21164	3.36931	2.52698	1.68466	0.842328	0
Peru	2050	1194.33	1410.61	2604.94	0.00125518	0.00170316	0.00146366	56.282	59.1126	61.9432	64.7738	67.6044	70.435	73.2656	76.0962	78.9268	81.7574	77.6695	73.5817	69.4938	65.4059	61.318	57.2302	53.1423	49.0544	44.9666	40.8787	36.7908	32.703	28.6151	24.5272	20.4393	16.3515	12.2636	8.17574	4.08787	0
Philippines	*2070	2673.99	5027.9	7701.89	0.00281024	0.00607065	0.00432752	144.264	148.42	152.576	156.732	160.888	165.043	169.199	173.355	177.511	181.667	177.125	172.584	168.042	163.5	158.959	154.417	149.875	145.334	140.792	136.25	131.709	127.167	122.625	118.084	113.542	109	104.459	99.9169	95.3752	90.8335	86.2919	81.7502	77.2085	72.6668	68.1252	63.5835	59.0418	54.5001	49.9584	45.4168	40.8751	36.3334
Russia	2060	53566.6	45075	98641.6	0.056296	0.0544232	0.0554245	1755.55	1777.31	1799.08	1820.84	1842.6	1864.37	1886.13	1907.9	1929.66	1951.43	1886.38	1821.33	1756.28	1691.24	1626.19	1561.14	1496.09	1431.05	1366	1300.95	1235.9	1170.86	1105.81	1040.76	975.713	910.665	845.618	780.57	715.523	650.475	585.428	520.38	455.333	390.285	325.238	260.19	195.143	130.095	65.0475	0
Saudi Arabia	2060	13724.5	15293.2	29017.7	0.0144238	0.0184649	0.0163044	672.38	669.487	666.593	663.7	660.807	657.914	655.02	652.127	649.234	646.341	624.796	603.251	581.707	560.162	538.617	517.073	495.528	473.983	452.438	430.894	409.349	387.804	366.26	344.715	323.17	301.626	280.081	258.536	236.992	215.447	193.902	172.358	150.813	129.268	107.723	86.1788	64.6341	43.0894	21.5447	0
Singapore	2050	1470.31	1016.32	2486.63	0.00154523	0.00122709	0.00139718	32.507	35.6866	38.8662	42.0458	45.2253	48.4049	51.5845	54.7641	57.9437	61.1233	58.0671	55.0109	51.9548	48.8986	45.8424	42.7863	39.7301	36.674	33.6178	30.5616	27.5055	24.4493	21.3931	18.337	15.2808	12.2247	9.16849	6.11233	3.05616	0
South Africa	2050	13157.3	6843.85	20001.1	0.0138277	0.00826322	0.0112382	435.929	426.574	417.219	407.864	398.509	389.154	379.799	370.443	361.088	351.733	334.147	316.56	298.973	281.387	263.8	246.213	228.627	211.04	193.453	175.867	158.28	140.693	123.107	105.52	87.9333	70.3467	52.76	35.1733	17.5867	0
South Korea	2050	16059.2	10043.8	26103	0.0168774	0.0121268	0.0146667	616.075	605.703	595.331	584.958	574.586	564.214	553.842	543.469	533.097	522.725	496.589	470.452	444.316	418.18	392.044	365.907	339.771	313.635	287.499	261.362	235.226	209.09	182.954	156.817	130.681	104.545	78.4087	52.2725	26.1362	0
Switzerland	2050	1356.64	575.146	1931.79	0.00142577	0.000694427	0.00108543	34.932	34.3872	33.8424	33.2976	32.7528	32.208	31.6632	31.1184	30.5736	30.0288	28.5274	27.0259	25.5245	24.023	22.5216	21.0202	19.5187	18.0173	16.5158	15.0144	13.513	12.0115	10.5101	9.00864	7.5072	6.00576	4.50432	3.00288	1.50144	0
Thailand	2065	6918.41	7737.17	14655.6	0.00727092	0.00934181	0.00823464	278.496	281.002	283.509	286.015	288.522	291.028	293.535	296.041	298.547	301.054	292.452	283.851	275.249	266.648	258.046	249.445	240.843	232.242	223.64	215.038	206.437	197.835	189.234	180.632	172.031	163.429	154.828	146.226	137.625	129.023	120.422	111.82	103.218	94.6169	86.0154	77.4139	68.8123	60.2108	51.6092	43.0077	34.4062	25.8046
Turkey	2050	9087.5	10583.3	19670.8	0.00955053	0.0127782	0.0110526	446.204	464.047	481.89	499.732	517.575	535.418	553.261	571.104	588.946	606.789	576.45	546.11	515.771	485.431	455.092	424.752	394.413	364.073	333.734	303.395	273.055	242.716	212.376	182.037	151.697	121.358	91.0184	60.6789	30.3395	0
United Arab Emirates	*2070	4328.08	5639.86	9967.94	0.00454861	0.00680953	0.00560076	204.087	203.286	202.485	201.684	200.883	200.082	199.281	198.48	197.679	196.878	191.956	187.034	182.112	177.19	172.268	167.346	162.424	157.502	152.58	147.658	142.737	137.815	132.893	127.971	123.049	118.127	113.205	108.283	103.361	98.439	93.517	88.5951	83.6731	78.7512	73.8292	68.9073	63.9853	59.0634	54.1414	49.2195	44.2975	39.3756
United Kingdom	2050	16406.1	4180.12	20586.2	0.017242	0.00504705	0.0115669	346.773	329.645	312.517	295.389	278.262	261.134	244.006	226.878	209.75	192.622	182.991	173.36	163.729	154.098	144.467	134.836	125.205	115.573	105.942	96.3112	86.6801	77.049	67.4178	57.7867	48.1556	38.5245	28.8934	19.2622	9.63112	0
United States	2050	177814	68531.8	246346	0.186874	0.0827448	0.138416	5007.34	4822.63	4637.93	4453.22	4268.52	4083.81	3899.11	3714.4	3529.7	3344.99	3177.74	3010.49	2843.25	2676	2508.75	2341.5	2174.25	2007	1839.75	1672.5	1505.25	1338	1170.75	1003.5	836.249	668.999	501.749	334.499	167.25	0
Vietnam	2050	3905.8	7573.64	11479.4	0.00410481	0.00914436	0.00645004	326.014	337.833	349.652	361.471	373.29	385.109	396.928	408.747	420.566	432.385	410.766	389.147	367.527	345.908	324.289	302.67	281.05	259.431	237.812	216.193	194.573	172.954	151.335	129.716	108.096	86.477	64.8578	43.2385	21.6193	0
SUM		837654	705533	1.54319e+06	0.880335	0.851856	0.867082	32818.7	32560.7	32302.8	32044.9	31786.9	31529	31271.1	31013.1	30755.2	30497.2	29366.4	28235.5	27104.6	25973.7	24842.9	23712	22581.1	21450.2	20319.4	19188.5	18057.6	16926.7	15795.9	14665	13534.1	12403.2	11272.4	10141.5	9010.6	7879.73	7231.36	6582.98	5934.61	5286.24	4637.86	3989.49	3341.12	2692.74	2044.37	1396	1252.1	1108.2
ROW	*2070	113863	122697	236561	0.119665	0.148144	0.132918	4305.17	4305.17	4305.17	4305.17	4305.17	4305.17	4305.17	4305.17	4305.17	4305.17	4197.54	4089.91	3982.28	3874.65	3767.03	3659.4	3551.77	3444.14	3336.51	3228.88	3121.25	3013.62	2905.99	2798.36	2690.73	2583.1	2475.47	2367.84	2260.22	2152.59	2044.96	1937.33	1829.7	1722.07	1614.44	1506.81	1399.18	1291.55	1183.92	1076.29	968.664	861.034
World		951517	828230	1.77975e+06	1	1	1	37123.9	36865.9	36608	36350	36092.1	35834.2	35576.2	35318.3	35060.3	34802.4	33563.9	32325.4	31086.9	29848.4	28609.9	27371.4	26132.9	24894.4	23655.9	22417.4	21178.9	19940.4	18701.8	17463.3	16224.8	14986.3	13747.8	12509.3	11270.8	10032.3	9276.31	8520.31	7764.31	7008.31	6252.3	5496.3	4740.3	3984.3	3228.29	2472.29	2220.76	1969.23
																																															0
Part of ROW:
Int. Transp	*2070	29055	29140.9	58195.9	0.0305354	0.0351845	0.0326989	1022.49	1022.49	1022.49	1022.49	1022.49	1022.49	1022.49	1022.49	1022.49	1022.49	996.924	971.362	945.8	920.238	894.676	869.114	843.551	817.989	792.427	766.865	741.303	715.741	690.178	664.616	639.054	613.492	587.93	562.368	536.805	511.243	485.681	460.119	434.557	408.995	383.432	357.87	332.308	306.746	281.184	255.622	230.059	204.497
* No net zero target, 2070 assumed
[truncated: 10 more columns]

## Sheet: 2030 emission estimates
Country	Cumulative CO2 emissions 1990-2021	Emissions in 1990	Emissions in 2005	Emissions in 2010	Emissions in 2021	2030 emissions estimate	Assumed Net zero date	Cumulative emissions 2022-2030	Values used for 2030 (unconditional)	NDC or CAT	Comment	2030 target formulation in NDC	Climate action tracker estimate, gathered 15 Aug 2023 Absolute emissions level in 2030.	Net zero target formuiation
Argentina	5077.12	112.079	161.434	186.733	186.448	184.866	2050		1% below 2010	CAT		Not exceeding the net emission of 349 million tons of carbon dioxide equivalent in 2030	315.9 MtCO2e in 2030 [34% above 1990] [1% below 2010]	Argentina aims to reach GHG neutrality by 2050
Australia	11707.5	278.154	386.154	405.103	391.187	324.082	2050		20% below 2010	CAT		45% below 2005 levels	375 MtCO2e in 2030. 13% below 1990. 20% below 2010	aims to reach GHG neutrality by 2050
Brazil	12250.3	218.658	364.371	440.269	488.881	422.658	2050		4% below 2010	CAT		37% below 2005 levels by 2025, 50% below levels by 2030	962 mtCO2e, 58% above 1990, 4% below 2010	Climate neutral by 2050
Canada	17407.2	458.218	574.654	556.561	545.635	345.068	2050		38% below 2010	CAT		At least 40-45% below 2005 levels by 2030	419-462 MtCO2e [22-30% below 1990] [35-41% below 2010]	Net zero GHG emissions by 2050
Chile	2024.46	32.891	60.926	71.311	85.447	76.3028	2050		7% above 2010	CAT		Unconditional: Chile commits to a GHG emission budget not exceeding 1,100 MtCO2e between 2020 and 2030, with a GHG emissions maximum (peak) by 2025, and a GHG emissions level of 95 MtCO2e by 2030. Conditional:In addition, under certain specific conditions (financial, markets, technological and political) Chile could exceed a 30% reduction, potentially with a reduction of up to 45% in net emission…	Unconditional: Level of emissions to be achieved at home (domestic target component) 95 MtCO2e [90% above 1990] [7% above 2010] Conditional: 90 MtCO2e to 95 MtCO2e [80%-90% above 1990] [1%-7% above 2010]	Mitigation Goal: By the year 2050 at the latest neutrality of greenhouse gas emissions shall be achieved.
China	208433	2484.86	5876.56	8616.65	11472.4	10986.2	2060		27,5% over 2010	CAT		China’s updated NDC contains five overarching targets: 1. Peaking carbon dioxide emissions “before 2030” (up from the previous “around 2030 and making efforts to peak earlier”) and achieve carbon neutrality before 2060. 2. Lower carbon intensity by “over 65%” in 2030 from the 2005 level, (up from the previous “by 60–65%”). 3. Share of non-fossil fuels in primary energy consumption to “around 25%”…	13.4–14.7 GtCO2e* [270–303% above 1990] [22–33% above 2010]	China will strive to reach a CO2 emissions peak before 2030, and achieve carbon neutrality before 2060
Colombia	2257.44	56.898	60.06	76.278	91.703	82.3802	2050		8% above 2010	CAT		Emissions limit of 169.4 MtCO2e in 2030 (equivalent to a 51% reduction below BAU), with an emissions peak by 2027*. Carbon budgets for the period 2020-2030 will be established by 2023.	161 MtCO2e** [64% above 1990] [8% above 2010]	Carbon neutral by 2050
Costa Rica	204.505	2.913	6.723	7.493	7.82	6.81863	2050		9% below 2010	CAT		Costa Rica commits to an absolute maximum net emissions in 2030 of 9.11 MtCO2e including all emissions and all sectors covered by the corresponding National Greenhouse Gas Emissions Inventory (Government of Costa Rica, 2020).	Level of emissions to be achieved at home: 11.9–12.5 MtCO2e [7–11% below 2010]	Aims to reach net zero emissions by 2050
Egypt	5337.55	75.218	165.044	200.841	249.624	353.48	2060		76% above 2010	CAT		Only conditional target: Sectoral emissions reduction targets compared to a business as usual (BAU) scenario in 2030: • Electricity (33% below BAU)* • Transport (7% below BAU)* • Oil & gas (65% below BAU)*	507–522 MtCO2e [296–308% above 1990] [74–79% above 2010]	NA
Ethiopia	234.946	2.987	4.956	6.337	17.793	12.6106	2060		99% above 2010	CAT		Unconditional: The unconditional pathway will result in absolute emission levels of 347.3 MtCO2e in 2030 equal to a 14% (-56 MtCO2e) reduction below BAU in 2030. (The 2021 NDC provides all emissions estimates using global warming potentials of the AR5.) Conditional: The conditional pathway will result in absolute emission levels to 125.8 MtCO2e in 2030 equal to a 68.8% (-277.7 MtCO2e) reduction b…	Unconditional: 269 MtCO2e [300% above 1990] [99% above 2010] Conditional: 237 MtCO2e [253% above 1990] [76% above 2010]	Intention to become carbon-neutral (no target year communicated).
European Union (27)	110291	3865.49	3735.9	3432.64	2793.02	1789.72	2050		53.7% below 1990	CAT		55% reduction compared to 1990	2,242 MtCO2e [53.7% below 1990] [46.3% below 2010]	climate-neutral EU by 2050
Gambia	11.91	0.198	0.322	0.425	0.656	0.82875	2050		95% above 2010	CAT		Unconditional: 49.7% reduction below BAU in 2030 International support needed ´+ additional conditional:2.6% reduction below BAU in 2030 through two mitigation measures in forestry and energy	Uncondtional: 5.53 MtCO2e [95% above 2010] Conditional: 2.74 MtCO2e [4% below 2010]	Net-zero greenhouse gas emissions by 2050
India	46678	577.997	1184.93	1676.49	2709.68	3285.93	2070		96% above 2010	CAT		Emissions intensity of 45% below 2005 levels by 2030 + conditional 50% cumulative electric power installed capacity from non-fossil fuel-based energy resources by 2030	Unconditional: 4.4 GtCO2e [284% above 1990] [96% above 2010] Conditional:4.3-4.4 GtCO2e [273-281% above 1990] [90-94% above 2010]	India has pledged to become net zero by 2070
Indonesia	12184.9	144.796	348.989	451.546	619.278	1128.87	2060		150% above 2010	CAT		Unconditional: Reduce emissions by 32% against the 2030 BAU. Conditional: Reduce emissions by up to 43% against the 2030 BAU.	Unconditional: 1805 MtCO2e [468% above 1990] [150% above 2010] Conditional: 1710 MtCO2e [438% above 1990] [136% above 2010]	Through the long-term strategy – low carbon and climate resilience scenario (LTS-LCCR 2050) – Indonesia will increase ambition on GHG reduction by achieving the peaking of national GHG emissions in 2030 with a net sink of forest and land-use sector, reaching 540 MtCO2e by 2050, and with further exploring opportunity to rapidly progress towards net-zero emission in 2060 or sooner.
Iran	15048	209.944	463.162	569.772	748.879	748.879								NA
Japan	39055.3	1158.13	1290.6	1215.06	1067.4	753.336	2050		38% below 2010	CAT		46% reduction in 2030 from 2013 levels including LULUCF credits*	813 MtCO2e [36% below 1990] [38% below 2010]	Carbon neutrality by 2050
Kazakhstan	7260.41	278.782	200.438	246.983	276.683	271.681	2060		10% above 2010	CAT		Unconditional: A 15% reduction in GHG emissions by 31 December 2030 compared to the base year (1990). Conditional: A 25% reduction in GHG emissions by 31 December 2030 compared to the base year (1990), subject to additional international investments, access to low carbon technologies transfer mechanism, green climate funds and flexible mechanism for country with economy in transition.	Unconditional: Level of emissions to be achieved at home (domestic target) 331 MtCO2e [14% below 1990] [10% above 2010] Conditional: 293 MtCO2e [24% below 1990] [3% below 2010]	Kazakhstan will reach carbon neutrality by 2060.
Kenya	353.236	5.687	8.338	11.745	19.875	23.9598	2060		104% above 2010	CAT		Unconditional: Kenya seeks to abate GHG emissions by 32% by 2030 relative to the BAU scenario of 143 MtCO2e and in line with its sustainable development agenda. Kenya intends to bear 21% of the mitigation cost from domestic sources. Conditional: Kenya seeks to abate GHG emissions by 32% by 2030 relative to the BAU scenario of 143 MtCO2e and in line with its sustainable development agenda. 79% of …	126 MtCO2e [203% above 1990] [104% above 2010] Conditional: 108 MtCO2e [159% above 1990] [75% above 2010]	NA
Mexico	13579.4	317.042	463.993	463.783	407.205	537.988	2060		16% above 2010	CAT		Up to 35% GHG below BAU by 2030, where 30% is to be achieved with own resources and the additional 5% with “agreed international support and cooperation for clean energies”. 51% reduction of black carbon below BAU by 2030. Note: Here we only consider the 30% percentage to be achieved with own resources. Conditional: Up to 40% GHG, 70% black carbon, below a BAU baseline by 2030.	Level of emissions to be achieved at home with own resources (domestic target): 786–863 MtCO2e [72–89% above 1990] [11–22% above 2010] Conditional: Level of emissions to be achieved with international support (Conditional NDC target against modelled domestic pathways): 689–766 MtCO2e [51-67% above 1990] [2% below – 9% above 2010]	NA
Morocco	1430.21	22.298	44.661	54.365	70.578	83.1784	2060		53% above 2010 levels	CAT		The 2021 NDC increases the unconditional mitigation objective to 18.3% below BAU by 2030 Conditional: The 2021 NDC increases the conditional mitigation objective to 45.5% below BAU by 2030	118 MtCO2e 53% above 2010 levels Conditional: 84 MtCO2e 1% below 2010 levels	NA "Morocco will consider scenarios to achieve carbon neutrality in the second half of the century"
New Zealand	1064.39	25.503	37.424	34.811	33.79	22.9753	2050		34% below 2010	CAT	Use CAT even though there is NDC due to unorthodox accounting in NDC	50% reduction in GHG emissions from 2005 level of emissions in 2030 including LULUCF. "While the update strengthens the country’s 2030 target, the effect is nowhere near a 50% reduction, as the government has deployed misleading accounting methods that more than halve its effective reduction in net emissions to 22% below 2005 levels by 2030."	51.43 MtCO2e [21% below1990] [34% below 2010]	Net zero 2050
Nigeria	2750.34	38.857	105.758	112.314	136.987	137.023	2060		22% above 2010	CAT		Unconditional: 20% below BAU by 2030 Conditional: 47% below BAU by 2030	Unconditional: 304-331 MtCO2e [55-68% above 1990] [17-27% above 2010] Conditional: 201-264 MtCO2e [2-35% above 1990] [1% above to 23% below 2010]	Nigeria has committed to set a net zero GHG target in the range of 2050 and 2070
Norway	1349.12	35.097	43.342	45.691	40.919	16.8466	2050		52% below 1990	CAT		At least 55% reduction in greenhouse gas emissions compared to 1990 levels	24.7 MtCO2e [52% below 1990] [55% below 2010]	Achieve emission reductions of 90–95% from 1990 by 2050
Peru	1194.33	21.401	36.934	57.173	56.282	81.7574	2050		43% above 2010	CAT		Peru’s national contributions set an unconditional goal of limiting its GHG emissions to a maximum level of 208.8 MtCO2e by 2030 Conditional: Conditioned to the availability of international financing, Peru proposes to limit its GHG emissions to a level of 179 MtCO2e by 2030	Level of emissions to be achieved at home with own resources (domestic target): 122.7 MtCO2e [129% above 1990] [43% above 2010] Conditional: Level of emissions to be achieved at home with international support (Conditional NDC target against modelled domestic pathways): 107.7 MtCO2e [101% above 1990] [25% above 2010]	Peru aims to reach net zero emissions by 2050
Philippines	2673.99	41.349	73.272	82.953	144.264	181.667	2060		119% above 2010	CAT		Unconditional:2.71% of its 75% reduction below a cumulative 2020-2030 BAU trajectory will be achieved unconditionally Conditional: 75% below a cumulative 2020-2030 BAU trajectory of which 72.29% is conditional on international support	Unconditional: 384 MtCO2e [119% above 2010] Conditional: 96 MtCO2e [45% below 2010]	NA
Russia	53566.6	2534.86	1559.08	1626.19	1755.55	1951.43	2060		20% above 2010	CAT	Use CAT even though there is NDC due to low credibility of NDC	Limiting GHG emissions to up to 70% compared to 1990 levels by 2030, taking into account the maximum possible absorptive capacity of forests and other ecosystems, and subject to sustainable and balanced socio-economic development of the Russian Federation.	Up to 2,408 MtCO2e [24% below 1990] [20% above 2010]	Achieve a balance between anthropogenic emissions of greenhouse gases and their absorption no later than 2060.
Saudi Arabia	13724.5	208.497	395.855	517.716	672.38	646.341	2060		210% above 1990	CAT		NA	"Based on this BAU range, and due to the uncertainties around the contributions of emissions reductions from land use and forestry, we project Saudi Arabia’s NDC emissions level to be anywhere between 520–800 MtCO2e in 2030, excluding LULUCF. This represents an approximate change of -19% to +24% compared 2019 levels, or 146–275% above 1990 levels."	2060
Singapore	1470.31	43.536	40.322	55.066	32.507	61.1233	2050		11% above 2010	CAT	93% of Singapore’s emissions (excluding LULUCF) comprise of CO2,	To reduce emissions to around 60 MtCO2e in 2030 after peaking its emissions earlier.	60 MtCO2e* [145% above 1990] [11% above 2010]	Net zero GHG emissions by 2050.
South Africa	13157.3	312.93	415.931	462.807	435.929	351.733	2050		24% below 2010	CAT		Unconditional: In 2030, South Africa’s annual GHG emissions will be in a range from 350–420 MtCO2e	366–436 MtCO2e by 2030 excluding LULUCF (uncertainty on GWP used) [3–23% above 1990 by 2030 excl. LULUCF] [18%–31% below 2010 by 2030 excl. LULUCF]	"We thus commit to ultimately moving towards a goal of net zero carbon emissions by 2050, which will require various interventions to reduce greenhouse gas emissions."
South Korea	16059.2	250.511	498.688	594.339	616.075	522.725	2050		32% reduction below 2018 levels (670,16 Mt CO2 in 2018)	CAT		40% below 2018 levels, including reductions from LULUCF and internationa	"the CAT estimates the new NDC reduces South Korea’s fair share target (excl. LULUCF, incl. international credits) from 563 to 468 MtCO2e and its domestic target (excl. LULUCF and international credits) from 579 to 501 MtCO2e (32% reduction below 2018 levels)."	carbon neutral by 2050
Switzerland	1356.64	44.16	45.779	45.046	34.932	30.0288	2050		32% below 1990	CAT	Use CAT due to Switzerlands planned use of credits	A reduction of at least 50% by 2030 compared with 1990 levels, corresponding to an average reduction of greenhouse gas emissions by at least 35% over the period 2021–2030.	Level of emissions to be achieved at home (domestic target included in revised CO2 Act) 36–37 MtCO2e in 2030 [31–33% below 1990] [33–34% below 2010]	Switzerland should achieve balanced greenhouse gas performance by 2050 at the latest (net zero).
Thailand	6918.41	86.705	227.314	261.786	278.496	301.054	2065		15% above 2010	CAT		Unconditional:Reduce greenhouse gas emissions by 30% from projected business-as-usual level by 2030. Conditional: Reduce greenhouse gas emissions by 40% from projected business-as-usual level by 2030, subject to adequate and enhanced access to technology development and transfer, financial resources and capacity building support.	Unconditional: 389 MtCO2e [96% above 1990] [15% above 2010] Conditional: 333 MtCO2e [68% above 1990] [1% below 2010]	Thailand aims to achieve carbon neutrality by 2050 and net-zero GHG emissions in 2065.
Turkey	9087.5	151.665	264.769	316.036	446.204	606.789	2050		92% above 2010	CAT		41% reduction in GHG emissions from the BAU level by 2030	765 MtCO2e [248% above 1990] [92% above 2010]	Achieve net zero emissions by 2050
United Arab Emirates	4328.08	51.704	114.478	180.622	204.087	196.878	2060		9% above 2010	CAT		Reduction of 31% in GHG emissions, measured in CO2e, relative to BAU in 2030.	214 MtCO2e [248% above 1990] [9% above 2010]	NA
United Kingdom	16406.1	601.945	570.338	511.905	346.773	192.622	2050		68% below 1990	CAT and NDC same		A reduction of at least 68%, relative to 1990 levels	251 MtCO2e [68% below 1990] [59% below 2010]	It is the duty of the Secretary of State to ensure that the net UK carbon account for the year 2050 is at least 100% lower than the 1990 baseline. (The net carbon account includes all greenhouse gas emissions in the UK, not just CO2).
United States	177814	5122.5	6137.6	5681.39	5007.34	3344.99	2050		45,5% below 2005	CAT		50-52% below 2005 levels by 2030 (incl. LULUCF)	"In its Nationally Determined Contribution (NDC), the US has set a target of reducing emissions by 50%–52% below 2005 levels by 2030 (U.S. Department of State, 2021a). This target covers all sectors and all greenhouse gases (GHG). The CAT excludes emissions from land use, land use change and forestry (LULUCF) from this target, resulting in a 44%–47% reduction below 2005 levels by 2030. Level of e…	Net-Zero Greenhouse Gas Emissions by 2050.
Vietnam	3905.8	21.299	94.694	138.585	326.014	432.385	2050		212% above 2010			Unconditional: 15.8% reduction below BAU in 2030 Conditional: 43.5% reduction below BAU in 2030	Unconditional: 863 MtCO2e [791% above 1990] [212% above 2010] Conditional: 620 MtCO2e [540% above 1990] [124% above 2010]	Net zero by 2050
SUM	837654	19895.8	26063.8	29414.8	32818.7	30497.2
Share of global emissions covered from these countries	0.880335	0.874251	0.880099	0.881624	0.884032
World	951517	22757.5	29614.6	33364.3	37123.9	34802.4
ROW	113863	2861.72	3550.82	3949.53	4305.17	4305.17	2060		Assumption of flat emissions until 2030

## Sheet: Population (UN data)
Source UN World Population Prospects 2022: United Nations, Department of Economic and Social Affairs, Population Division (2022). World Population Prospects 2022, Online Edition.
Country	Argentina	Australia	Brazil	Canada	Chile	China	Colombia	Costa Rica	Egypt	Ethiopia	EU 27	Gambia	India	Indonesia	Iran	Japan	Kazakhstan	Kenya	Mexico	Morocco	New Zealand	Nigeria	Norway	Peru	Philippines	Republic of Korea	Russian Federation	Saudi Arabia	Singapore	South Africa	Switzerland	Thailand	Turkey	United Arab Emirates	United Kingdom	United States of america	Viet Nam	SUM	World	ROW				Austria	Belgium	Bulgaria	Croatia	Denmark	Estonia
1950	16849.7	8048.9	53151.9	13593.6	6563.89	539190	11614.8	933.321	20928.8	17516.7	328104	302.972	353104	68862.9	16641	83656.3	6540.83	5711.67	27231.6	8826.64	1892.69	36835.6	3282.14	7571.19	18062.1	20160.3	101801	3043.15	986.749	12907.7	4668.09	20167.3	20715	72.048	49931	147096	24830	2.06139e+06	2.47767e+06	416280				6937.81	8597.14	7120.74	3846.03	4251.53	1094.83
1951	17185.8	8305.43	54758.8	13892.5	6683.4	548768	11924.7	963.654	21371.3	17903.2	330370	310.589	360938	70272.3	17025	85049.8	6770.52	5836.43	27968.7	9065.78	1930.53	37543.1	3280.69	7786.75	18877.7	20047.7	103360	3136.24	1026.65	13180	4717.19	20656	21240	77.135	50179.1	149467	25388.4	2.09726e+06	2.52097e+06	423711				6935.07	8637.54	7194.52	3883.35	4283.86	1109.32
1952	17523.4	8534.23	56423.3	14278.9	6813.95	558460	12249.5	995.843	21841.4	18299.1	332633	318.637	368907	71766.4	17414	86317.1	7005.42	5975.12	28687.3	9311.41	1973.72	38263.2	3311.99	8008.22	19724.5	20186.1	104944	3230.93	1071.22	13470.1	4779	21173.2	21799	82.39	50364.7	151730	25866.7	2.13373e+06	2.56529e+06	431558				6925.79	8673.27	7262.95	3917.29	4315.3	1123.35
1953	17864.3	8731.36	58143.4	14692.6	6951.98	571450	12590.5	1030.05	22374.9	18694.5	335062	327.017	377088	73375.2	17815	87526.4	7242.72	6122.34	29436	9566.29	2024.18	38985.6	3344.66	8234.7	20611.2	20600.7	106636	3327.76	1121.24	13775.7	4844.25	21714.7	22390	87.793	50604.9	154154	26512.5	2.17505e+06	2.61525e+06	440197				6928.24	8717.9	7323.99	3954.26	4346.22	1137.14
1954	18201.2	8906.97	59908	15110.5	7096.3	583308	12944	1066.06	22943.6	19089.3	337825	335.736	385368	75040.7	18221	88587.9	7481.86	6281.56	30208.2	9827.12	2073.75	39709.8	3378.34	8464.23	21536.3	21124.1	108350	3426.28	1176.26	14090.8	4907.19	22274.7	22991	93.325	50852.3	156749	27129.2	2.21608e+06	2.66531e+06	449230				6935.35	8762.92	7401.43	3992.66	4378.75	1149.47
1955	18537.3	9099.77	61747.2	15535.9	7246.52	596564	13317.3	1104.14	23538.8	19495	340470	344.744	394095	76809.9	18649	89598.2	7730.03	6460.82	31025.6	10100.1	2118.91	40455.2	3411.44	8702.57	22514.4	21741.7	110092	3528.79	1236.17	14420.9	4970.71	22864.9	23545	98.947	51087.5	159663	27885.7	2.25981e+06	2.71865e+06	458844				6943.93	8811.54	7477.77	4031.08	4409.89	1162.13
1956	18864.1	9319.92	63654.9	15931.9	7399.86	610076	13707.9	1143.83	24144.6	19912.5	343192	354.004	403061	78673.1	19098	90582.4	7987.43	6656.92	31878.7	10384.2	2163.04	41223.3	3446.74	8949.22	23541.4	22408.4	111852	3635.03	1299.05	14767.3	5034.11	23483	24098	104.66	51299	162610	28640.3	2.30458e+06	2.77349e+06	468915				6948.59	8857.52	7558.08	4068.24	4443.12	1174.43
1957	19198.3	9539.7	65634.9	16402.2	7561.43	622490	14114.9	1185.3	24762.4	20343.4	345732	363.491	412252	80650.6	19566	91460.7	8260.92	6870.96	32773.2	10679.2	2209.66	42009.8	3476.46	9204.87	24617.3	23118.6	113715	3745.03	1366.11	15130.6	5097.79	24127.6	24849	110.465	51544.2	165517	29431	2.34911e+06	2.82851e+06	479400				6954.89	8905.49	7634.12	4103.04	4475.99	1185.47
1958	19529.3	9748.68	67686.9	16897.9	7722.43	637516	14543.8	1228.82	25394.3	20655.4	348478	373.337	421619	82731.4	20045	92214.6	8550.4	7104.2	33705.8	10984.8	2260.99	42816.9	3508.55	9468.95	25734.6	23869.5	115467	3859.03	1435.28	15509.7	5163.36	24796.8	25628	116.395	51820.6	168381	30337.1	2.3969e+06	2.88722e+06	490317				6975.75	8958.45	7710	4135.67	4506.11	1196.11
1959	19861.4	9957.61	69785	17328.9	7890.71	650067	14977.8	1274.4	26007.6	20977.7	351437	383.571	430973	84906.1	20545	93128	8847.1	7342.72	34654.3	11291.7	2312.13	43612.6	3538.41	9736.07	26870.8	24644.2	117280	3974.57	1504.1	15892	5230.46	25473.8	26387	122.816	52101.1	171913	31271	2.4435e+06	2.945e+06	501495				6997.83	9016.89	7788.68	4167.38	4536.55	1203.62
1960	20187.6	10173.8	71976.7	17720.9	8056.38	654291	15444.4	1321.71	26683.9	21476.7	354399	394.162	440828	87189.2	21099	94024	9159.69	7608.79	35704.5	11613.2	2357.89	44475.8	3568.11	10022.3	28050	25428	118873	4098.57	1571.94	16300.9	5296.05	26206.9	27149	129.741	52382.2	174736	32229.8	2.48223e+06	2.99559e+06	513360				7029.37	9081.89	7852.82	4199.2	4566.33	1210.54
1961	20511.9	10399.5	74208.4	18097.8	8227.26	654050	15931	1370.89	27385.1	22002.7	357211	405.135	451081	89576.6	21679	94905.7	9478.88	7894.08	36831.6	11926.4	2404.49	45380.9	3594.93	10322.1	28923.8	26207	120597	4232.56	1630.22	16740	5360.49	26986.3	27873	137.111	52703.8	177641	33207.1	2.51712e+06	3.04288e+06	525762				7063.74	9135.56	7930.69	4231.45	4597.12	1225.59
1962	20849.4	10612.3	76451.6	18449.6	8399.81	656471	16433.9	1421.38	28110.7	22560.6	360276	416.468	461622	92057.3	22289	95805.2	9799.72	8200.86	38047	12237.1	2458.74	46330.2	3625.06	10634.1	29761.1	26897.4	122221	4379.54	1684.88	17238.9	5508.86	27813.6	28637	144.857	53018.7	180534	34036.9	2.55544e+06	3.09386e+06	538428				7107.13	9201.38	8008	4264.25	4629.75	1240.9
1963	21191.3	10811.5	78746.8	18795.1	8572.43	672759	16948.7	1472.69	28859.4	23143.7	363188	428.153	472426	94633.7	22922	96730.5	10119.1	8526.3	39319.5	12572.4	2513.88	47313.5	3653.21	10950.1	30610.9	27571.5	123608	4537.49	1737.23	17767.3	5639.58	28670.7	29430	152.898	53348.6	183302	35030.9	2.608e+06	3.15951e+06	551506				7150.81	9259.28	8073.55	4295.89	4662.24	1255.42
1964	21536.7	11023.2	81084.3	19146.9	8739.58	695049	17473.2	1524.6	29632.5	23754.3	366195	440.194	483441	97291.4	23597	97762.9	10436.5	8868.1	40644.7	12880.9	2566.17	48331.6	3680.39	11275.3	31476.5	28240.2	124847	4705.82	1787.8	18317.1	5749.78	29557.5	30226	161.115	53668.5	185998	36022.6	2.66713e+06	3.23205e+06	564916				7198.93	9317.17	8142.76	4326.19	4699.38	1269.66
1965	21880.2	11240	83441.3	19505.7	8910.51	714139	18006.3	1576.72	30420.8	24393.1	369368	452.556	494677	100059	24301	98875.8	10745.4	9226.67	42023	13207.6	2615.12	49381.1	3708.96	11609.3	32356.7	28871.5	125941	4884.44	1836.85	18889.1	5829.71	30469.6	31000	169.496	54054.5	188557	36995.8	2.72362e+06	3.30238e+06	578756				7246.87	9383.77	8212.68	4355.89	4736.65	1285.01
1966	22227.1	11478.9	85806.2	19871.9	9079.37	733554	18545.3	1628.75	31216.1	25061.9	372280	465.259	505551	102257	25033	100062	11049.9	9607.74	43452.9	13556.2	2661.51	50470.5	3738.06	11953.8	33254.3	29487.3	126860	5073.4	1884.45	19485.3	5884.38	31410.9	31749	178.097	54404.6	190850	37936.4	2.77907e+06	3.37185e+06	592782				7292.9	9440.41	8277.46	4386.87	4776.02	1299
1967	22579.1	11706.5	88152.3	20238.6	9243.93	752343	19077.5	1680.49	32010.1	25693.4	375183	478.248	516434	104865	25764	100872	11345.2	9997.47	44907.9	13920.8	2707.2	51570.1	3768.09	12302.2	34155.2	30189.1	127728	5273.07	1929.24	20094.3	5952.78	32356.6	32596	186.921	54716.4	192812	38840	2.83367e+06	3.44099e+06	607315				7348.92	9491.82	8340.34	4416.68	4816.78	1312.62
1968	22934.9	11911.7	90494.2	20577.5	9408.6	769669	19610.4	1731.64	32806.7	26409.8	377966	492.015	527540	107656	26503	102184	11637.2	10404.7	46406	14298.7	2743.19	52643.3	3800.59	12661.1	35078.6	30892.1	128496	5488.98	1971.32	20727.1	6031.89	33322.1	33457	195.886	55036.3	194752	39725.1	2.88766e+06	3.50991e+06	622246				7402.34	9538.64	8399.33	4442.92	4852.68	1326.86
1969	23291.1	12142.8	92824.3	20886.3	9574.4	791075	20134.6	1781.03	33602.6	27147.5	380482	506.287	539324	110621	27248	103455	11918.5	10823.1	47934.7	14681.5	2769.65	53776.9	3832	13025.4	36011.4	31567.2	129149	5720.19	2010.03	21374	6104.52	34292.6	34312	231.277	55302.2	196734	40565.5	2.94623e+06	3.58371e+06	637480				7425.28	9573.87	8477.24	4465.36	4882.79	1341.59
1970	23653	12393.9	95176.5	21181.5	9738.2	811787	20650	1830.91	34389.3	27913.3	382819	521.084	551306	113677	28040	104749	12166.5	11256	49494.1	15072.5	2803.06	54944.6	3863.04	13402.1	36943	32256.9	129830	5969.5	2044.79	22034.4	6169.08	35282.5	35132	275.244	55538.9	198984	41466.2	3.00475e+06	3.6576e+06	652845				7453.37	9610.33	8548.6	4484.42	4909.52	1355.82
1971	24032.6	12796.2	97563.2	21687.6	9902.77	833282	21160.6	1880.49	35174.6	28703.2	385006	536.379	563697	116779	28860	106085	12364.1	11690.2	51084.5	15476.2	2845.06	56194	3888.05	13722.7	37928.2	32945.4	130356	6242.88	2078.87	22702.2	6193.37	36300.9	35950	320.925	55761.5	201672	42391.5	3.06526e+06	3.73318e+06	667927				7477.23	9648.42	8617.3	4500.86	4936.4	1368.18
1972	24414.2	13191.5	99969.3	22089.7	10066	853289	21650.3	1930.48	35937.3	29496	387617	552.254	576301	119915	29687	107494	12524.5	12106.8	52710.8	15878.4	2892.71	57481.3	3917.77	14101.3	38915.3	33631.3	131083	6550.44	2112.93	23360.7	6234.04	37315.1	36770	368.101	55990.3	204143	43441.8	3.12513e+06	3.80714e+06	682014				7519.85	9684.36	8675.22	4517.69	4966.57	1381.41
1973	24811.4	13409.1	102419	22354.7	10225.5	872392	22145.8	1980.61	36724.2	30286.7	390239	568.853	589374	123093	30536	108947	12699.5	12539.1	54376	16284.5	2949.05	58866.4	3948.33	14483.6	39909.7	34322.4	131830	6898.08	2150.2	24036.3	6288.26	38353.7	37606	416.636	56124.3	206333	44370.2	3.18429e+06	3.88246e+06	698164				7564.31	9716.23	8725.09	4535.16	4995.59	1393.84
1974	25229.7	13617.5	104914	22649.4	10390.1	890912	22646.8	2031.88	37517.3	31102	392661	586.123	602841	126325	31428	110412	12880.5	12981.8	56080.4	16694.4	3012.23	60344.5	3973.09	14866	40902.8	34997	132553	7279.43	2186.53	24728.7	6326.46	39392.4	38451	466.456	56209	208296	45412.3	3.2433e+06	3.95805e+06	714747				7603.74	9739.73	8781.89	4553.11	5021.58	1405.86
1975	25669.8	13809.2	107420	22975.5	10555.3	907823	23148.9	2084.59	38343.4	31875.3	395138	603.685	616603	129566	32363	111788	13064.5	13426.1	57811.4	17110.3	3073.4	61971.4	3997.67	15248.4	41873.9	35641.6	133388	7687.58	2218.13	25425.3	6355.98	40409.5	39276	517.455	56258.6	210260	46385.1	3.30117e+06	4.03299e+06	731822				7590.32	9758.4	8839.46	4570.61	5045.57	1418.38
1976	26081.3	13964.5	109981	23297	10723.7	922427	23658.5	2139.11	39207.7	32630.3	397248	622.133	630445	132861	33351	113036	13253.4	13877.7	59572.4	17540.3	3117.46	63731.3	4017.27	15634.6	42915	36219.7	134296	8107.51	2246.72	26130.6	6320.56	41407.4	40071	569.333	56275.1	212289	47554.2	3.35682e+06	4.10589e+06	749067				7563.53	9768.46	8882.48	4588.24	5070.84	1429.71
1977	26499.2	14111.7	112592	23587.2	10886	936325	24167.5	2195.97	40090.4	33494.1	399328	641.656	644458	136181	34331	114214	13438.9	14326.9	61332.7	17972.7	3138.16	65585.4	4035.36	16019	44033.7	36692.9	135233	8531.6	2277.15	26830	6283.59	42356.8	40931	659.021	56251.4	214251	48773	3.41206e+06	4.17913e+06	767069				7563.49	9778.61	8922.47	4606.14	5086.71	1441
1978	26928.4	14275.1	115287	23843.4	11053.7	948837	24720.4	2255.28	41064.4	33895.9	401281	662.212	658913	139542	35422	115309	13648.1	14827.8	63192.3	18440.2	3144.18	67593.9	4051.36	16430.2	45259.3	37129.7	136191	8978.84	2307.18	27569.7	6278.08	43330.8	41840	754.701	56238.3	216624	50063.3	3.46718e+06	4.25242e+06	785235				7569.22	9794.13	8948.44	4625.32	5102.49	1453.24
1979	27363.9	14436.6	118041	24082	11221.8	961441	25286.9	2317.14	42088.9	34622.2	403005	683.736	673622	142960	36565	116310	13852.5	15347	65055.7	18919.5	3142.41	69672.8	4066.25	16846.7	46522.2	37530.3	137127	9442.29	2339.32	28317.2	6284.97	44282.6	42744	855.762	56243.2	219139	51339.6	3.52312e+06	4.3269e+06	803779				7551.27	9806.28	8968.1	4646.23	5115.37	1464.46
1980	27804.4	14604.5	120853	24356.3	11386.9	975157	25871.8	2381.38	43176	34895.4	404721	706.574	688875	146426	37845	117221	14063.1	15894.2	66890.1	19415.8	3142.66	71827.9	4079.05	17271.6	47786.3	37945.6	137894	9921.71	2377.14	29076.8	6303.4	45237.5	43631	961.141	56287.1	221787	52323.2	3.5804e+06	4.40427e+06	823872				7543.69	9821.99	8980.76	4668.81	5123.47	1472.85
1981	28245.2	14808.2	123724	24666.8	11552.8	989588	26480.6	2447.23	44321.1	34995.5	406534	730.597	704782	149928	39197	118028	14282.3	16480	68520.2	19941.1	3151.67	74075	4092.5	17713.2	49052.8	38395.4	138621	10421.7	2424.32	29850.3	6334.82	46238	44547	1066.96	56365.6	224493	53613.4	3.63971e+06	4.48375e+06	844038				7551.44	9835.98	8980.46	4691.48	5127.32	1481.12
1982	28697.4	15051.9	126613	24964.8	11722.4	1.00493e+06	27091.4	2515.44	45478	36642.2	407966	755.095	720956	153444	41756	118744	14512.5	17091.9	69947.3	20475.5	3169.57	76275.8	4107.21	18151.5	50305.9	39068.4	139385	10934.7	2479.12	30614.9	6372.57	47216.6	45417	1133.4	56426.1	226815	54947.4	3.70218e+06	4.56551e+06	863332				7581.2	9851.21	8976.37	4716.48	5126.64	1490.42
1983	29148.1	15284.9	129518	25238.2	11892.4	1.02203e+06	27719	2586.12	46699.3	37784.6	409290	781.449	737382	157013	43244	119452	14755.9	17731.1	71366.3	21018.1	3201.87	78500.4	4122.65	18597.2	51571.2	39738.5	140311	11467.6	2535.32	31430	6409.33	48184.1	46483	1202.31	56474.1	229187	56316.9	3.76567e+06	4.65046e+06	884788				7561.38	9863.48	8964.6	4740.97	5126.15	1500.33
1984	29606.1	15481.2	132437	25483.2	12060.6	1.03642e+06	28365.6	2658.95	48008.1	38685.7	410437	809.677	754271	160568	44812	120135	15016	18407.8	72794.3	21556.7	3237.79	80202.8	4134.49	19056.6	52868.2	40369	141397	12024.4	2594.23	32300.4	6427.49	49157.1	47569	1272.84	56529.1	231593	57706	3.82645e+06	4.73331e+06	906856				7556.84	9869.58	8948.26	4762.81	5122.51	1511.1
1985	30058.3	15677.7	135340	25720.9	12234.9	1.05193e+06	29012.4	2733.45	49344.8	39720	411662	839.92	771520	164096	46445	120806	15279.1	19098.5	74185	22077.9	3262.89	82472.3	4145.98	19514.7	54161.7	40959.7	142388	12596.3	2654.51	33236	6455.4	50116.4	48644	1343.83	56607.4	233940	59107.7	3.88938e+06	4.81836e+06	928979				7560.29	9877.61	8930.72	4789.92	5120.12	1521.15
1986	30516	15893.6	138226	25966.9	12417.9	1.06855e+06	29640.1	2809.47	50726.9	40851.9	412814	871.997	788964	167488	48087	121432	15547.5	19805.8	75559.1	22592.3	3273.82	84698.2	4159.3	19978.5	55463.6	41505.7	143405	13184.2	2717.48	34269.9	6484.25	51073.5	49707	1415.25	56678.7	236352	60514.9	3.95365e+06	4.9051e+06	951451				7563.94	9883.45	8903.44	4816.73	5118.78	1530.42
1987	30980.7	16131	141061	26265.2	12611.1	1.08699e+06	30280.1	2886.22	52121.8	42058.7	414036	905.963	806793	170783	49739	121989	15895.1	20516	76889.7	23056.6	3289.52	86910.2	4175.62	20438.4	56756.1	42111.7	144688	13782.5	2781.98	35485.8	6522.81	52010.7	50741	1522.15	56765.1	238673	61927.3	4.02057e+06	4.99503e+06	974462				7570.56	9892.17	8880.76	4840.63	5119.95	1541.63
1988	31452.2	16387.5	143872	26608.6	12814.5	1.10672e+06	30926	2962.97	53560.9	43645.2	415323	941.866	824639	174060	51344	122549	16249.9	21248.2	78217.3	23503.3	3309.38	89178.2	4198.45	20904.3	58074.3	42698.8	145936	14397.1	2847.51	36752.9	6566.1	52947.7	51760	1629.67	56887.5	241033	63334.3	4.08948e+06	5.08694e+06	997463				7574.2	9908.27	8850.75	4859.29	5123.07	1553.78
1989	31929.4	16664.3	146636	27021.6	13022.3	1.12506e+06	31587.5	3039.96	55036	45377.9	416600	979.808	842821	177329	52880	123048	16611.3	22004	79566.7	23937.9	3322.63	91524.7	4220.86	21383.3	59437.6	43278.1	146993	15030.3	2913.5	38034.8	6619.25	53874.2	52792	1737.69	57017.8	243543	64740.8	4.15762e+06	5.17765e+06	1.02003e+06				7593.32	9927.72	8820.88	4872.37	5129.15	1565.39
1990	32402.2	16928.9	149371	27467.2	13234.9	1.14377e+06	32258.8	3118.05	56495.7	47014	417909	1019.66	861205	180569	54409	123494	16798.7	22771.6	80900.8	24358.3	3344.88	93963.4	4233.29	21865.4	60817.1	43856.9	147690	15676.1	2977.89	39302.5	6673.17	54773.8	53818	1845.99	57134.4	246366	66192	4.22602e+06	5.26976e+06	1.04374e+06				7645.46	9946.62	8787.98	4876	5138.71	1570.7
1991	32873.2	17167.1	152042	27847.2	13450.8	1.16364e+06	32944	3198.46	57933.6	48742.1	419160	1061.58	879700	183751	57178	123879	16934.5	23552.9	82540.1	24783.3	3449.89	96465.1	4249.98	22352.8	62300.7	44383.1	148321	16333.4	3066.53	40452.6	6750.22	55683.1	54830	1954.32	57286.5	249802	67633.3	4.29769e+06	5.36259e+06	1.0649e+06				7711.99	9972.5	8747.58	4871.41	5150.53	1570.64
1992	33338.4	17375.1	154631	28184.3	13673.1	1.17761e+06	33601.2	3280.37	59288.5	51132.7	420427	1105.5	898184	186972	58804	124269	17053.1	24283.5	84163.1	25192.8	3513.3	98905.6	4273.79	22813.2	63778.8	44591.7	148589	16975.2	3174.71	41369.3	6840.57	56516.7	55812	2062.45	57432.4	253319	69084.4	4.36162e+06	5.4499e+06	1.08828e+06				7799.28	10001.6	8695.74	4817.63	5166.11	1560.61
1993	33798.2	17550	157171	28510.9	13891.5	1.19002e+06	34276.8	3363.51	60689.8	52890.4	421619	1148.81	916964	190145	59940	124620	17033.7	25027.9	85823.2	25608.5	3551.82	101458	4299.32	23281.3	65308.2	44815.7	148862	17587.5	3281.76	42152.2	6905.79	57361.4	56792	2170.01	57586.1	257032	70493.1	4.42303e+06	5.53547e+06	1.11244e+06				7882.35	10031.3	8641.34	4779.01	5184.82	1520.15
1994	34256.3	17713.1	159711	28825.4	14105.3	1.2017e+06	34952.6	3447.23	62074.6	54693	422635	1187.81	935738	193330	59571	124939	16925.7	25755.7	87473.7	26005.1	3595.66	104092	4324.95	23746.5	66858.4	45050	148933	18105.4	3386.51	42898.7	6966.45	58190.8	57800	2276.56	57708.9	260527	71859.7	4.48135e+06	5.6194e+06	1.13804e+06				7928.2	10056.2	8581.73	4805.79	5202.73	1488.72
1995	34721.1	17897.9	162250	29137	14316.1	1.21288e+06	35638.3	3531.07	63477.1	56547.4	423510	1223.96	954785	196528	60401	125300	16568.6	26511.7	89155.2	26398.1	3646.12	106820	4348.53	24220.1	68442.2	45281.6	148726	18629.7	3490.72	43637.3	7016.62	59029.2	58820	2381.49	57862.9	264020	73142.5	4.54029e+06	5.70206e+06	1.16177e+06				7942.53	10082.2	8515.2	4833.06	5224.87	1462.73
1996	35171.1	18108.1	164781	29441.9	14517.5	1.22341e+06	36301.9	3614.64	64856.7	58405.6	424120	1260.35	973773	199753	61189	125568	16300	27244.9	90784	26800	3701.67	109555	4370.14	24678.1	70058.8	45505.3	148389	19148	3597.03	44334.9	7059.97	59820.4	59791	2486.49	57997.8	267301	74375.7	4.59757e+06	5.78438e+06	1.18681e+06				7952.06	10108.2	8439.96	4781.14	5245.52	1442.82
1997	35607.6	18315.6	167294	29745.8	14713.4	1.23319e+06	36963.2	3697.83	66273.7	60289.7	424691	1297.79	992790	202995	62008	125884	15988.5	27986.5	92389.1	27198.1	3755.25	112357	4392.88	25136.6	71831.2	45815.1	148077	19672.5	3706.78	44988.3	7079.41	60601.8	60797	2658.99	58159.4	270667	75517.2	4.65453e+06	5.86591e+06	1.21138e+06				7964.02	10138.2	8362.79	4736.11	5266.49	1426.53
1998	36024.3	18504.9	169800	30019.7	14905.1	1.24242e+06	37620.7	3781.02	67713.8	62177.3	425231	1336.22	1.01188e+06	206261	62953	126172	15652.4	28742	93977.1	27596.1	3796.46	115225	4417.78	25594.2	73606.5	46109.7	147802	20204.2	3814.52	45581.8	7094.58	61376.5	61758	2833.25	58341	274123	76600	4.71104e+06	5.94705e+06	1.23601e+06				7970.17	10171.5	8275.14	4686.63	5288.27	1416.45
1999	36442.1	18698.5	172280	30269.9	15088.4	1.25126e+06	38268.2	3861.83	69178.2	64095.7	425692	1376.16	1.03099e+06	209450	63970	126445	15296.1	29532.7	95557.5	27987.6	3823.63	118156	4445.57	26042.2	75377.3	46390.8	147543	20740.9	3918.06	46122.5	7121.86	62114	62726	3009.01	58535.6	277547	77656.8	4.767e+06	6.02757e+06	1.26057e+06				7981.56	10205.6	8194.72	4633.23	5309.71	1405.84
2000	36864	18903.3	174693	30529.6	15264.5	1.25961e+06	38901.9	3941.03	70637.5	66059.5	426165	1416.84	1.05001e+06	212544	64980	126665	15216.4	30397.5	97112.1	28366.4	3843.36	121235	4478.72	26462.2	77120.8	46650.1	147130	21278.4	4014.9	46606.8	7162.54	62771.3	63645	3186.12	58734.8	280817	78590.6	4.82201e+06	6.10794e+06	1.28593e+06				8001.2	10242.9	8129.89	4577.42	5329.99	1401.16
2001	37277.5	19132.6	177055	30837	15439.1	1.26859e+06	39528.4	4017.35	72105.2	68004.3	427105	1458.24	1.06926e+06	215601	66109	126943	15256.1	31305.7	98634.8	28742.4	3867.18	124468	4503.69	26846.6	78795.7	46927.1	146560	21816.4	4092.3	47019.7	7201.58	63361.9	64582	3364.55	58965.3	283980	79411.7	4.87816e+06	6.18986e+06	1.3117e+06				8019.66	10285.8	8065.5	4519.44	5351.32	1392.59
2002	37683.4	19363.7	179369	31168.5	15608.8	1.27689e+06	40147.4	4089.09	73603.3	70033.6	427745	1500.66	1.08869e+06	218624	67241	127189	15306.5	32295	100154	29117.8	3911.98	127837	4524.35	27183.2	80456.5	47202.5	145911	22355.5	4150.37	47439.7	7247.23	63937.9	65562	3543.85	59218.7	286961	80223.9	4.93348e+06	6.27164e+06	1.33816e+06				8059.59	10332.7	8004.23	4494.07	5370.18	1383.39
2003	38086.6	19588	181584	31476.3	15778.8	1.28496e+06	40760.7	4156.15	75184.2	72112.8	429012	1543.79	1.10794e+06	221606	67413	127415	15371.5	33264.7	101680	29485.8	3985.19	131329	4552.53	27485.8	82114.6	47438.9	145269	22891.3	4203.22	47883.3	7305.73	64507.2	66415	3723.46	59492.7	289740	81060.7	4.98782e+06	6.35318e+06	1.36536e+06				8098.39	10378.4	7945.4	4471.66	5387.21	1375.09
2004	38469.7	19810	183674	31762.6	15939.5	1.29279e+06	41354.6	4221.07	76742.4	74224.8	430386	1588.73	1.12689e+06	224554	68496	127590	15462	34269.6	103178	29836.7	4054.7	134910	4577.81	27760.9	83771	47640.6	144624	23410.3	4249.61	48324.8	7355.72	65046.7	67319	3903.42	59806.9	292480	81890.9	5.04236e+06	6.43462e+06	1.39226e+06				8141.81	10426.7	7890.08	4450.61	5405.5	1366.24
2005	38867.9	20040.1	185770	32060.7	16096.5	1.30085e+06	41941.9	4284.53	78302.4	76377.2	431955	1635.72	1.14564e+06	227323	69627	127753	15581.9	35314.1	104713	30229.5	4108.12	138603	4606.75	28027	85444	47814	144083	23913.3	4291.19	48787.4	7406.58	65575.7	68251	4083.25	60184.8	295416	82731.5	5.09769e+06	6.51688e+06	1.4192e+06				8200.62	10485.6	7840.55	4436.09	5425.68	1358.72
2006	39273.1	20303.3	187825	32371.1	16254.2	1.30893e+06	42500	4347.24	79848.2	78562.7	433299	1685.01	1.16364e+06	230287	70738	127844	15730.6	36371.9	106172	30634.3	4157.44	142378	4640.63	28267.6	87078.5	47965.2	143517	24882	4398.08	49246.9	7450.29	66067.1	69159	4478.73	60582.7	298269	83552.7	5.1527e+06	6.59947e+06	1.44677e+06				8253.45	10548.3	7789.89	4423.28	5446.95	1350.6
2007	39680.6	20630.7	189817	32692.6	16415	1.31725e+06	43045.8	4409.1	81411.1	80819.4	434792	1737.58	1.18111e+06	233308	71814	127960	15914.9	37478.6	107602	31031.8	4202.52	146281	4681.54	28494.6	88725.1	48133.5	143160	25883.7	4575.08	49736.6	7499.73	66572	70044	5319.18	61024.7	301237	84350.9	5.20884e+06	6.68336e+06	1.47453e+06				8282.08	10617.6	7742.18	4411.84	5468.78	1342.82
2008	40071.6	21030.9	191742	33032.3	16576.1	1.32578e+06	43567.3	4470.94	83026.4	83172.9	436714	1792.19	1.19827e+06	236409	72825	128053	16097.4	38595	109004	31433.5	4240.47	150307	4737.61	28706.2	90397.6	48307.7	143075	26916.4	4751.43	50255.6	7584.08	67081.5	70894	6426.07	61496.7	304250	85173.6	5.26627e+06	6.76853e+06	1.50226e+06				8307.37	10689.8	7695.89	4399.22	5490.66	1338.33
2009	40475.9	21464.8	193602	33404.8	16746.8	1.33455e+06	44063.3	4532.9	84663.2	85541.3	438292	1848.89	1.21519e+06	239464	73812	128103	16295.6	39778.8	110365	31836.5	4280	154458	4799.7	28906.2	92107	48489.6	143098	27958.3	4925.38	50876	7692.5	67575	71748	7551.3	61987.6	307140	86020.9	5.32365e+06	6.85466e+06	1.53101e+06				8334.9	10763.7	7653.93	4388.11	5514.84	1335.69
2010	40892.8	21857	195433	33783	16920.1	1.3437e+06	44564.5	4593.35	86338.9	87969.9	439402	1907.35	1.23209e+06	242499	74834	128131	16509.1	40950.1	111734	32249.3	4325.77	158733	4858.7	29112.5	93786.9	48686.5	143229	29009.3	5096.03	51465.6	7776.31	68052.3	72703	8433.99	62499.1	309884	86945	5.38095e+06	6.94195e+06	1.561e+06				8350.98	10839	7615.54	4376.15	5538.07	1333.41
2011	41307.5	22181.4	197274	34143.8	17088.3	1.35269e+06	45067.7	4651.15	88165.9	90505.7	440382	1967.2	1.24914e+06	245534	75914	128079	16746.6	42085.7	113331	32680.5	4366.91	163173	4920.78	29346.7	95486.5	48939.6	143256	29814.6	5231.15	52104.3	7868.56	68488.6	73687	8529.55	63020.9	312482	87877.1	5.43752e+06	7.02925e+06	1.59173e+06				8374.68	10916.9	7569.01	4361.21	5563.63	1329.66
2012	41734	22532.7	199096	34503.3	17258.9	1.36151e+06	45550.1	4708.7	90234.2	93130.2	441204	2029.22	1.2661e+06	248666	76772	127935	16983.3	43184.6	114970	33126.9	4395.63	167755	4986.34	29608.8	97189.3	49400.2	143473	30487.3	5331.54	52782.4	7953.4	68937.1	74660	8620.86	63551.8	315272	88821.2	5.49445e+06	7.117e+06	1.62255e+06				8407.72	10994.6	7517.25	4342.47	5588.4	1325.2
2013	42170.7	22925.8	200859	34880.5	17424.7	1.37162e+06	46014.7	4764.49	92246.5	95772.4	441760	2092.81	1.28287e+06	251780	77877	127772	17222.5	44267	116542	33577.4	4424.94	172397	5051.77	29890.4	98875.3	49868.2	143785	31155.8	5430.47	53507.7	8038.07	69377	75894	8709.08	64065.7	318031	89781.5	5.55272e+06	7.2064e+06	1.65368e+06				8451.56	11067.7	7459.44	4320.72	5613.52	1320.17
2014	42605.8	23297.7	202584	35246.9	17595.2	1.38058e+06	46461.1	4818.58	94509.2	98396.3	442037	2156.93	1.29939e+06	254772	79041	127586	17469	45317.7	118039	34029.6	4476.35	177055	5109.57	30187.2	100525	50328.2	144128	31809.2	5525.64	54239.5	8138.66	69780.2	77258	8794.61	64538.9	320719	90754	5.60931e+06	7.29479e+06	1.68548e+06				8507.52	11138.9	7402.9	4296.99	5637.25	1315.8
2015	43042.3	23641.4	204335	35562.3	17779	1.38979e+06	46894.7	4869.99	96675.4	101097	442519	2221.11	1.3151e+06	257688	80882	127368	17715.6	46346	119472	34467.6	4552.04	181703	5166.28	30520.7	102126	50787.8	144442	32441.9	5615.36	55219.6	8236.92	70141.7	78966	8877.29	65008.1	323349	91717	5.66634e+06	7.38324e+06	1.7169e+06				8584.61	11214.6	7341.38	4270.95	5664.05	1313.26
2016	43471.8	23999	206042	35901.9	17961.2	1.39764e+06	47344.7	4920.49	98772.2	103847	442888	2285.16	1.33063e+06	260496	82699	127134	17956.2	47357	120827	34893.3	4629.14	186289	5214.43	30903	103937	51201	144895	33057.8	5684.67	56533.4	8326.54	70447.1	80326	8956.51	65440.6	325867	92665.8	5.72144e+06	7.46996e+06	1.74852e+06				8700.23	11282	7277.12	4238.68	5691.54	1316.06
2017	43864.6	24392.4	207678	36325.1	18206.5	1.40614e+06	47907.2	4969.92	100796	106740	443471	2349.25	1.34664e+06	263204	83913	126854	18200.9	48432.4	122211	35321.2	4707.02	191045	5258.75	31362.5	105813	51419	145323	33774.7	5739.19	56311.1	8419.25	70767	81713	9032.02	65869.8	328553	93587.3	5.77632e+06	7.55699e+06	1.78068e+06				8772.74	11351.7	7214.82	4208.83	5722.18	1315.79
2018	44244.6	24788.3	209332	36783.6	18530.6	1.41441e+06	48796.1	5017.76	102783	109656	444023	2413.11	1.36175e+06	265794	85097	126471	18428.7	49463.9	123468	35735.1	4785.48	195947	5296.04	31848.4	107664	51604.3	145582	34611.5	5789.78	56971.3	8484.12	71029.5	82467	9104.58	66259.8	331029	94478.8	5.82993e+06	7.64265e+06	1.81272e+06				8822.25	11417.3	7150.03	4176.11	5752.39	1319.3
2019	44582.6	25170.2	211001	37286.9	18872.3	1.41973e+06	49757.8	5063.7	104699	112603	444664	2476.72	1.37626e+06	268340	86138	126041	18647.5	50442.7	124560	36120	4891.57	200828	5328.6	32559.4	109474	51749.5	145723	35424.8	5839.29	57708	8544.75	71226.2	83152	9175.76	66606.1	333251	95349.8	5.87928e+06	7.72493e+06	1.84564e+06				8858.77	11479.9	7084.83	4144.86	5780.98	1324.99
2020	44908.4	25544.2	212565	37758.2	19206.7	1.424e+06	50617	5105.36	106539	115638	445390	2541.05	1.38997e+06	270826	86990	125543	18861.1	51460.2	125610	36488.8	5026.5	205781	5367.95	33090.3	111288	51858.1	145762	36230	5893.52	58466.1	8606.43	71389.4	83812	9247.55	66951.2	335388	96203.6	5.92592e+06	7.80497e+06	1.87906e+06				8901.11	11541.3	7020.23	4114.64	5810.78	1329.09
2021	45163.6	25795.9	213828	38019.2	19393.9	1.42586e+06	51244.3	5140.85	108392	118743	445191	2606.94	1.40281e+06	272890	87590	124947	19097.4	52511.3	126386	36888.7	5095.77	210874	5391.72	33519.2	113094	51831.3	145473	35764.2	5926.22	59137.7	8670.8	71562	84459	9327.03	67167.8	336496	97093.8	5.96338e+06	7.87693e+06	1.91355e+06	0.757069			8914.45	11582.2	6938.11	4079.1	5840.5	1329.8
2022	45389.9	26046.3	214825	38290.8	19592.4	1.42593e+06	51788.8	5167.06	110133	121823	444912	2672.89	1.41232e+06	274616	88257	124278	19295.5	53499.9	127024	37264.5	5163.68	215928	5414.32	33911.7	114666	51829	144733	36136.6	5955.9	59646.8	8712.02	71640.3	85092	9403.26	67394.3	337499	97842.3	5.99409e+06	7.94166e+06	1.94757e+06				8929.72	11640.7	6833.62	4041.17	5867.98	1327.6
2023	45630.7	26308.6	215802	38617.8	19615	1.42585e+06	51959.2	5194.6	111847	124937	449720	2739.09	1.42203e+06	276386	88844	123625	19500.5	54555.1	127984	37651.5	5206.89	221154	5454.32	34187.5	116452	51802.6	144694	36681.1	5995.48	60141	8768.93	71753.8	85591	9479	67623.6	339080	98531.4	6.03139e+06	8.00855e+06	1.97716e+06				8949.52	11671.2	6730.28	4019.54	5896.55	1324.52
2024	45917.1	26569.7	217043	38944.8	19644.1	1.42549e+06	52211.1	5229.75	113586	128117	448124	2807.24	1.43523e+06	278682	89501	122964	19712.8	55646.1	128927	38028.6	5249.31	226455	5494.4	34518	118223	51765.5	144195	37213	6033.97	60688	8824.41	71848.8	86042	9554.75	67850	340913	99186.5	6.06643e+06	8.08207e+06	2.01564e+06				8968.4	11701.1	6645.15	3997.69	5925.28	1321.01
2025	46198.7	26829.3	218232	39269.3	19673.5	1.42486e+06	52470.4	5263.68	115383	131323	446883	2876.36	1.44821e+06	280914	90119	122299	19943.6	56760	129850	38394.3	5290.57	231849	5534.55	34848.9	119989	51718.4	143720	37734.9	6071.45	61352.4	8878.45	71922.8	86479	9628.96	68072.8	342716	99808.9	6.10137e+06	8.1556e+06	2.05423e+06				8985.88	11730.5	6592.08	3975.57	5954.11	1317.08
2026	46476.4	27086.8	219374	39593.6	19707.1	1.4239e+06	52751	5296.72	117168	134555	445921	2946.05	1.461e+06	283094	90703	121622	20168.2	57887.9	130753	38748.3	5330.82	237298	5574.38	35182.7	121739	51662.6	143269	38245	6107.63	61993.7	8930.77	71983.3	86914	9701.68	68288.4	344491	100399	6.13587e+06	8.22838e+06	2.09251e+06				9002.37	11758.6	6538.3	3953.22	5982.82	1312.72
2027	46750.6	27341.3	220480	39914	19746.5	1.42261e+06	53054.5	5328.68	118950	137806	445334	3016.14	1.47346e+06	285208	91250	120943	20387.4	59026.9	131635	39092.1	5370	242811	5613.87	35520.8	123481	51599.1	142862	38744.7	6142.68	62616.3	8981.48	72028.2	87351	9772.42	68499.2	346239	100961	6.16993e+06	8.30035e+06	2.13043e+06				9017.27	11785.8	6484.03	3930.7	6011.17	1308.03
2028	47021.3	27593.1	221525	40228.9	19791.3	1.42101e+06	53371.7	5359.6	120726	141074	444858	3086.47	1.4857e+06	287258	91764	120258	20601.7	60182	132487	39427	5407.61	248387	5652.98	35859.8	125206	51524.5	142463	39246.3	6176.2	63221.5	9030.44	72058.4	87787	9840.97	68702.4	347958	101495	6.20334e+06	8.3716e+06	2.16827e+06				9030.38	11812	6429.19	3907.95	6038.81	1303.05
2029	47287.6	27840.9	222521	40542.9	19840.1	1.41908e+06	53682.5	5389.6	122496	144358	444420	3156.9	1.49764e+06	289263	92246	119566	20813	61343.9	133321	39753.7	5443.91	254015	5691.6	36198.7	126918	51440	142063	39738.6	6208.14	63807.5	9077.27	72072.4	88220	9907.6	68897.3	349652	101999	6.23592e+06	8.44206e+06	2.20614e+06				9041.71	11837.5	6373.9	3884.99	6065.73	1297.8
2030	47549.6	28083.6	223459	40852.2	19899.1	1.41687e+06	53984.8	5418.42	124268	147650	443925	3227.93	1.5093e+06	291204	92705	118868	21023.1	62515.9	134138	40071.1	5478.83	259717	5729.67	36535.6	128615	51345	141647	40223	6237.99	64380	9122.26	72069.8	88657	9972.57	69086.3	351334	102475	6.26763e+06	8.51172e+06	2.24409e+06				9050.94	11861.8	6318.16	3861.82	6091.88	1292.29
2031	47807.5	28321.3	224359	41165	19968.5	1.41435e+06	54274.8	5446.07	126035	150943	443376	3299.37	1.52069e+06	293096	93137	118162	21233.3	63692	134930	40381.7	5512.51	265444	5767.12	36869.2	130292	51235.4	141219	40699.7	6265.98	64938.6	9165.13	72050.2	89103	10036.1	69265.2	352990	102925	6.29844e+06	8.58056e+06	2.28212e+06				9058.21	11885.1	6262.17	3838.46	6117.07	1286.59
2032	48059.5	28554	225198	41474.7	20047	1.41155e+06	54552.7	5472.54	127809	154227	442785	3370.93	1.53173e+06	294931	93550	117450	21442.3	64876.9	135706	40681.7	5544.98	271223	5803.89	37196.5	131954	51111	140781	41167.8	6291.75	65484.4	9206	72014	89561	10098.7	69438.3	354616	103342	6.32829e+06	8.64851e+06	2.32021e+06				9063.52	11907.7	6205.95	3814.82	6141.22	1280.74
2033	48309	28780.9	225981	41777.9	20129.7	1.40848e+06	54815.5	5497.66	129602	157522	442143	3442.76	1.54249e+06	296703	93942	116731	21652.7	66063.6	136457	40975.1	5576	277016	5839.88	37517.6	133590	50969.7	140338	41630.7	6315.09	66021.4	9245.21	71961.5	90022	10161.3	69605	356209	103735	6.35725e+06	8.71568e+06	2.35843e+06				9067.1	11929.1	6149.52	3790.86	6164.2	1274.85
2034	48554.1	29003.4	226714	42074.7	20208.6	1.40514e+06	55062.9	5521.56	131421	160798	441450	3515.12	1.55289e+06	298424	94319	116006	21863.6	67248.3	137176	41264.1	5605.73	282834	5875.31	37833.3	135197	50811.2	139894	42086.2	6335.98	66547	9282.69	71887.9	90473	10223.8	69765.3	357774	104101	6.38518e+06	8.78192e+06	2.39674e+06				9068.78	11949.7	6092.95	3766.46	6186.24	1268.88
2035	48795.2	29222.4	227393	42362.9	20281.6	1.40149e+06	55294.3	5544.29	133260	164079	440703	3587.34	1.56295e+06	300078	94685	115276	22076.6	68431.1	137872	41547.7	5634.07	288678	5910.06	38142.2	136782	50632.2	139448	42534.5	6354.12	67061.4	9318.72	71794.6	90911	10287.1	69919.2	359284	104441	6.41206e+06	8.84723e+06	2.43517e+06				9068.97	11969.3	6036.33	3741.85	6207.27	1262.93
2036	49030.7	29436.5	228018	42643.5	20348.7	1.39761e+06	55512.9	5565.57	135107	167352	439903	3659.89	1.57265e+06	301687	95038	114538	22290.6	69606.9	138530	41822.9	5661.21	294505	5944.3	38443.8	138341	50432.9	139008	42977.4	6369.75	67566.9	9353.18	71679.6	91332	10351.6	70068.7	360749	104755	6.43789e+06	8.91156e+06	2.47367e+06				9067.73	11987.9	5979.69	3716.88	6227.22	1257
2037	49261	29646.6	228590	42916.9	20409.4	1.39349e+06	55715.9	5585.4	136967	170621	439055	3732.54	1.58195e+06	303244	95381	113792	22507.1	70766	139158	42093.1	5687.34	300328	5977.88	38739.9	139869	50215.4	138574	43412.9	6382.8	68065	9386.55	71546	91736	10417.6	70211.9	362164	105046	6.46264e+06	8.97485e+06	2.51221e+06				9065.18	12005.4	5923.1	3691.59	6246.41	1251.13
2038	49486.5	29853.9	229106	43185.5	20463.4	1.38919e+06	55902.3	5603.81	138817	173884	438164	3804.99	1.59093e+06	304733	95716	113041	22726.1	71919.3	139752	42358.8	5712.31	306165	6011.03	39029.2	141374	49980.3	138147	43843	6393.15	68551.5	9419.14	71392.7	92131	10485.4	70353.6	363519	105315	6.48646e+06	9.0372e+06	2.55075e+06				9061.28	12021.6	5866.8	3666.07	6264.57	1245.32
2039	49703.9	30057.1	229559	43445.7	20511.8	1.38471e+06	56073.2	5620.73	140668	177144	437230	3877.23	1.59957e+06	306163	96044	112288	22947.7	73068	140306	42618	5736.33	312030	6043.77	39310.3	142860	49728.6	137730	44263.4	6400.92	69025.5	9450.56	71218	92513	10555	70489.2	364803	105560	6.50932e+06	9.09857e+06	2.58925e+06				9056.39	12036.7	5810.68	3640.24	6282.15	1239.57
2040	49913.2	30257.3	229961	43699.8	20553.3	1.38002e+06	56227.8	5635.95	142512	180415	436247	3949.09	1.60776e+06	307522	96362	111534	23171.7	74200.9	140817	42868.6	5759.52	317870	6075.75	39585.5	144310	49461.2	137314	44678	6406.21	69488.2	9481.2	71022.9	92879	10626.7	70623.3	366039	105785	6.53104e+06	9.15875e+06	2.62771e+06				9050.53	12050.5	5754.8	3614.12	6299	1233.85
2041	50115.7	30454.3	230304	43946.1	20589.2	1.37509e+06	56368.3	5649.74	144334	183690	435217	4020.47	1.61559e+06	308808	96675	110781	23399.1	75315.1	141293	43113.5	5781.89	323689	6107.05	39854.9	145735	49178.7	136908	45084.1	6409.26	69939.7	9511.01	70809.2	93236	10700.6	70755.6	367194	105990	6.55164e+06	9.21775e+06	2.66611e+06				9043.55	12063	5699.21	3587.86	6315.08	1228.14
2042	50310.1	30648.3	230585	44178.4	20618.7	1.36995e+06	56494.3	5661.64	146147	186975	434141	4091.64	1.62305e+06	310021	96978	110030	23630.1	76418.5	141727	43352.7	5803.4	329509	6137.65	40115.7	147123	48881.8	136511	45481.8	6409.62	70381.6	9540.28	70578.4	93582	10777.1	70884	368305	106171	6.5712e+06	9.27559e+06	2.70439e+06				9035.69	12073.9	5643.94	3561.25	6330.7	1222.46
2043	50495.5	30840.8	230805	44402.6	20642.8	1.36458e+06	56604.4	5672.19	147935	190252	433018	4161.94	1.63012e+06	311166	97277	109280	23863.3	77503.8	142124	43585	5824.01	335277	6167.68	40368.7	148481	48573.2	136125	45867.9	6407.73	70808.6	9568.77	70328	93916	10854.9	71008.3	369359	106334	6.5896e+06	9.3322e+06	2.7426e+06				9026.78	12083.1	5589	3534.62	6345.52	1216.73
2044	50674.2	31030.8	230968	44619.3	20662.6	1.35889e+06	56698.8	5681.22	149692	193554	431849	4231.82	1.63674e+06	312242	97566	108528	24099.6	78575.9	142472	43808.1	5843.69	341032	6196.97	40615.2	149819	48251.1	135746	46244.3	6403.83	71223.7	9596.45	70058.9	94234	10934.4	71127	370347	106479	6.60674e+06	9.38747e+06	2.78074e+06				9016.77	12090.5	5534.4	3507.9	6359.87	1210.96
2045	50844.1	31218.4	231087	44829.8	20676.9	1.35293e+06	56778.2	5688.7	151412	196840	430631	4301.51	1.64294e+06	313217	97847	107783	24336.3	79633	142784	44022.8	5862.42	346773	6225.48	40853.6	151132	47914.1	135364	46608.9	6398.03	71623.7	9623.43	69772.7	94537	11014.8	71238.6	371284	106611	6.62264e+06	9.44134e+06	2.81871e+06				9005.94	12095.8	5480.24	3481.07	6373.85	1205.12
2046	51005.4	31403.1	231158	45034.6	20686.1	1.34658e+06	56846.4	5694.62	153102	200132	429368	4370.64	1.64879e+06	314117	98115	107042	24571.6	80680.2	143055	44229.2	5880.17	352434	6253.08	41084.2	152417	47563.1	134978	46962.9	6390.36	72008.7	9649.55	69469.2	94822	11095.3	71344.5	372146	106725	6.6372e+06	9.49374e+06	2.85654e+06				8993.99	12099.7	5426.46	3454.27	6387.41	1199.24
2047	51158.4	31584.7	231180	45233.8	20691.2	1.33984e+06	56900.5	5699.12	154773	203398	428054	4439.51	1.65424e+06	314953	98366	106307	24806.4	81709.8	143287	44426.3	5896.96	358057	6279.85	41308.7	153684	47196.1	134588	47303.5	6381.09	72375.6	9674.81	69147.2	95087	11175.5	71439.4	372957	106822	6.65042e+06	9.54464e+06	2.89422e+06				8980.86	12101.2	5372.9	3427.47	6400.7	1193.27
2048	51304.2	31763.2	231158	45427.5	20692	1.33268e+06	56942.6	5702.01	156416	206670	426695	4507.51	1.65932e+06	315706	98592	105578	25038.4	82729.2	143481	44615.2	5912.93	363650	6306.08	41523.9	154922	46812.1	134194	47630.1	6370.35	72727.2	9699.11	68807.9	95331	11255.4	71523.8	373714	106900	6.6623e+06	9.59396e+06	2.93166e+06				8966.32	12100.6	5319.64	3400.61	6413.64	1187.23
2049	51439	31937.9	231091	45615.8	20689	1.32506e+06	56971	5703.38	158011	209925	425282	4574.61	1.6641e+06	316370	98786	104855	25268.5	83730.9	143626	44793.6	5927.84	369209	6331.43	41730.3	156131	46409.7	133783	47940.8	6358.13	73061.2	9722.01	68450.7	95548	11334.1	71598.5	374414	106962	6.67274e+06	9.64159e+06	2.96885e+06				8950.45	12098	5266.65	3373.68	6426.31	1181.1
2050	51563.6	32109.1	230972	45800.7	20681.4	1.31695e+06	56985.5	5703.27	159574	213190	423821	4640.71	1.66847e+06	316968	98945	104140	25497.6	84724.4	143734	44963.8	5942.14	374711	6355.8	41928.1	157313	45989.4	133354	48236.2	6344.62	73380.5	9743.58	68075.3	95744	11411.6	71659.8	375085	107003	6.68171e+06	9.68744e+06	3.00573e+06				8933.34	12093.7	5213.81	3346.89	6438.9	1174.87
2051	51678.7	32276.7	230799	45980.9	20669.3	1.30833e+06	56989.8	5701.78	161106	216435	422309	4706.78	1.67251e+06	317482	99069	103429	25722.4	85699.1	143810	45126.2	5955.86	380208	6379.32	42117	158470	45552.3	132912	48512.9	6329.85	73679	9763.93	67684.9	95914	11487.3	71710.2	375699	107023	6.68922e+06	9.73154e+06	3.04232e+06				8915.04	12087.6	5160.98	3319.96	6451.32	1168.52
2052	51783.1	32441	230580	46156.3	20652.5	1.29919e+06	56980.9	5698.85	162602	219658	420750	4772.03	1.67618e+06	317931	99155	102724	25945.3	86662	143849	45279	5968.68	385606	6402.14	42297.4	159605	45100.1	132449	48771.9	6314.03	73959.5	9782.37	67279.1	96050	11561	71750.9	376277	107020	6.69518e+06	9.77377e+06	3.07859e+06				8895.15	12080.3	5108.19	3293.14	6463.93	1162.08
2053	51878.3	32603	230323	46331.6	20631.6	1.28958e+06	56958.8	5694.56	164076	222875	419145	4836.48	1.67957e+06	318316	99200	102023	26163.7	87611.9	143853	45424.8	5981.04	390933	6424.03	42468.8	160706	44634.9	131968	49011	6297.28	74219.9	9799.54	66857.4	96161	11633	71779.4	376833	107000	6.69979e+06	9.81443e+06	3.11464e+06				8873.88	12071.6	5055.47	3266.29	6476.63	1155.54
2054	51961.8	32763.5	230023	46505.6	20606.9	1.2795e+06	56926.8	5689.09	165523	226070	417496	4900.48	1.68258e+06	318630	99203	101323	26379.5	88547.2	143823	45560.4	5992.97	396173	6445.48	42631.8	161782	44156	131473	49234.8	6279.49	74466	9815.17	66422.2	96242	11702.1	71793.7	377370	106956	6.70295e+06	9.85329e+06	3.15033e+06				8851.64	12061.6	5002.79	3239.52	6489.68	1148.91
2055	52036.7	32921.3	229675	46678.2	20577.1	1.26899e+06	56883.9	5682.29	166939	229236	415811	4963.73	1.68533e+06	318881	99162	100617	26593.5	89471.6	143757	45687.8	6004.34	401357	6466.26	42787.6	162828	43666.5	130963	49439	6260.99	74694.2	9829.09	65976.1	96291	11769.5	71801.9	377906	106888	6.70482e+06	9.89051e+06	3.1857e+06				8828.03	12050.8	4949.95	3212.88	6502.79	1142.15
2056	52099.3	33075.8	229284	46849.5	20543.5	1.25804e+06	56829.7	5674.41	168324	232364	414086	5025.68	1.6878e+06	319079	99077	99905.5	26804.2	90389.7	143658	45805.6	6015.19	406505	6486.53	42933.9	163839	43168.4	130438	49624.1	6241.99	74903.9	9841.84	65518.8	96307	11834.5	71798.8	378431	106795	6.70539e+06	9.9261e+06	3.2207e+06				8803.64	12039.1	4896.98	3186.22	6516.15	1135.26
2057	52154	33228	228839	47022.5	20506	1.2467e+06	56767.8	5665.37	169698	235443	412327	5087.03	1.68999e+06	319231	98952	99190.5	27011.9	91293.7	143526	45911.4	6025.61	411610	6506.38	43072.2	164823	42664	129901	49792.2	6222.34	75098.3	9853.72	65052.1	96291	11896.8	71789.6	378963	106685	6.7048e+06	9.96015e+06	3.25535e+06				8778.84	12027.1	4843.85	3159.78	6529.64	1128.29
2058	52198.2	33380	228360	47196.6	20465.1	1.23506e+06	56694.6	5655.41	171048	238493	410544	5147.85	1.69189e+06	319336	98788	98468	27217	92185	143363	46008.5	6035.62	416659	6525.8	43205	165775	42156	129353	49945	6202.12	75279.3	9864.55	64577.3	96248	11955.8	71775.6	379497	106550	6.7031e+06	9.99273e+06	3.28963e+06				8753.48	12014.6	4790.49	3133.28	6543.42	1121.17
2059	52232.6	33528.5	227844	47372.1	20420.1	1.2232e+06	56609.3	5644.38	172366	241513	408739	5207.56	1.69351e+06	319404	98585	97739.8	27418	93063	143173	46097.4	6045.1	421634	6544.7	43326.3	166692	41645.2	128799	50082.1	6181.51	75444.9	9874.6	64098.1	96176	12011.8	71756.2	380037	106393	6.70041e+06	1.00239e+07	3.32348e+06				8727.73	12001.9	4736.85	3106.84	6557.12	1113.94
2060	52257.4	33675.4	227276	47548.3	20371.3	1.21112e+06	56513.8	5632.19	173668	244469	406916	5266.41	1.69479e+06	319428	98347	97003.1	27615.2	93920.9	142951	46178.7	6054.02	426524	6563.39	43438.8	167584	41132.5	128240	50199.5	6160.49	75595.7	9883.83	63613	96079	12065.2	71734.4	380584	106213	6.69661e+06	1.00535e+07	3.35691e+06				8701.87	11989	4683.17	3080.35	6571.43	1106.66
2061	52274.2	33819.8	226678	47726.9	20318.9	1.19892e+06	56406.7	5618.99	174954	247370	405087	5324.29	1.69578e+06	319415	98075	96259.8	27810	94759.7	142707	46250.2	6062.67	431361	6581.73	43541	168443	40621.5	127676	50300.2	6139.13	75730.7	9892.5	63122.2	95956	12115.7	71713.7	381140	106010	6.69197e+06	1.00819e+07	3.38998e+06				8676.41	11976.2	4629.46	3053.82	6585.81	1099.25
2062	52281.4	33963.6	226040	47910.3	20263.3	1.18669e+06	56288.7	5604.82	176220	250245	403254	5381.31	1.69646e+06	319366	97776	95512	28002.6	95575.5	142433	46313.2	6070.97	436182	6599.91	43637.4	169275	40113.2	127111	50385.8	6117.89	75855.3	9901.13	62627	95813	12163	71691.9	381705	105788	6.68661e+06	1.01092e+07	3.42259e+06				8650.97	11963.4	4575.67	3027.22	6600.84	1091.81
2063	52280.7	34104.8	225364	48093.9	20204.3	1.17442e+06	56160.8	5589.68	177463	253089	401423	5437.68	1.69691e+06	319288	97447	94759.9	28193.1	96379.2	142134	46368	6078.98	440990	6618.31	43724.9	170086	39606.9	126546	50458.2	6096.18	75970.2	9909.96	62129.3	95653	12207.4	71671	382286	105545	6.68069e+06	1.01354e+07	3.45473e+06				8626.27	11951.4	4521.86	3000.62	6616.26	1084.27
2064	52272.4	34244.6	224649	48279.3	20142.1	1.16221e+06	56019.6	5573.74	178685	255877	399604	5492.97	1.69704e+06	319183	97094	94003.1	28381.6	97161.8	141807	46415.1	6086.44	445674	6636.76	43805.2	170865	39103.9	125987	50517.4	6074.37	76074.7	9918.97	61630.5	95472	12249.2	71655.1	382887	105283	6.67406e+06	1.01605e+07	3.48642e+06				8602.05	11939.7	4468.12	2974.01	6631.94	1076.71
2065	52256.4	34382.3	223891	48467.2	20076.4	1.15008e+06	55869.5	5556.97	179884	258620	397797	5547.31	1.69688e+06	319048	96717	93242.4	28567.1	97929.3	141457	46454.8	6093.54	450298	6655.45	43876.3	171607	38603	125430	50565.4	6052.31	76167.3	9928.03	61130.1	95272	12288.8	71643.5	383495	105005	6.66683e+06	1.01845e+07	3.51771e+06				8578.36	11928.4	4414.65	2947.41	6647.77	1069.1
2066	52234.3	34519.1	223091	48657.2	20008	1.13802e+06	55706.3	5539.35	181049	261310	396007	5600.71	1.69639e+06	318873	96315	92482.6	28751.4	98669	141079	46485.2	6100.26	454798	6674.16	43940	172326	38105.7	124875	50601.2	6030.07	76248.8	9937.56	60629.4	95052	12326.6	71635	384106	104711	6.65888e+06	1.02074e+07	3.5485e+06				8555.2	11917.9	4361.4	2920.77	6663.78	1061.45
2067	52202.2	34653.8	222250	48848.2	19936.3	1.12608e+06	55532.1	5520.88	182197	263961	394234	5653.28	1.69556e+06	318664	95894	91725.5	28934.4	99398.2	140668	46509.4	6106.61	459191	6693.05	43996.2	173004	37611.1	124327	50628.5	6007.84	76318.7	9947.27	60128	94819	12362.5	71625.9	384718	104403	6.65031e+06	1.02292e+07	3.57885e+06				8532.78	11907.6	4308.6	2894.11	6679.88	1053.82
2068	52163.9	34786.1	221371	49038.8	19862.2	1.11428e+06	55346.8	5501.27	183319	266558	392482	5704.79	1.69443e+06	318440	95456	90972.1	29116.1	100099	140235	46526.4	6112.26	463542	6712.18	44043.8	173647	37120.7	123787	50648.6	5985.59	76385.2	9957.36	59628.6	94574	12397.2	71620.7	385329	104085	6.64127e+06	1.025e+07	3.60874e+06				8510.87	11897.6	4256.32	2867.45	6696.3	1046.2
2069	52116.1	34918.3	220450	49228.9	19785.1	1.10257e+06	55150.8	5480.61	184421	269095	390755	5754.61	1.69299e+06	318177	95004	90230.9	29299.7	100784	139783	46539.6	6117.68	467789	6731.59	44083.1	174268	36634.7	123263	50660.9	5963.31	76440.3	9967.9	59130.1	94315	12430.3	71619.9	385940	103751	6.63164e+06	1.02697e+07	3.6381e+06				8489.33	11888.4	4204.65	2840.87	6712.65	1038.56
2070	52060.4	35049.2	219498	49417.5	19705.6	1.09101e+06	54943.7	5458.97	185491	271605	389056	5803.28	1.69127e+06	317879	94537	89496.6	29481.3	101448	139306	46544.9	6122.7	471926	6751.32	44114.7	174856	36153.6	122745	50670	5941.1	76483.9	9978.43	58633.7	94047	12463	71621.3	386523	103414	6.6215e+06	1.02884e+07	3.66691e+06				8468.43	11879.2	4153.65	2814.32	6729.26	1030.95
2071	51996.2	35177	218516	49604.3	19623.8	1.07957e+06	54726.2	5436.26	186537	274079	387384	5851.03	1.68919e+06	317552	94059	88777.1	29664.2	102089	138809	46543.5	6127.15	475953	6771.06	44137.8	175413	35675.7	122235	50676.3	5918.77	76520.4	9989.26	58137.9	93768	12496	71621.4	387087	103060	6.61077e+06	1.03059e+07	3.69515e+06				8447.76	11870.1	4103.32	2787.77	6745.7	1023.41
2072	51924.9	35301.4	217506	49787.9	19540.3	1.06824e+06	54498.4	5412.57	187565	276501	385739	5897.48	1.68679e+06	317212	93573	88071.6	29846.5	102707	138285	46535.1	6131.11	479871	6790.85	44152.3	175940	35203	121739	50679.4	5896.59	76552.1	10000.4	57645.2	93478	12528.8	71623.8	387656	102698	6.59951e+06	1.03224e+07	3.72285e+06				8427.2	11860.8	4053.72	2761.35	6761.87	1015.89
2073	51845.7	35423.2	216456	49968.9	19454.8	1.05699e+06	54259	5387.72	188566	278864	384123	5942.63	1.68404e+06	316848	93079	87383.7	30029.8	103302	137738	46519.9	6134.4	483745	6810.44	44159.8	176446	34736.2	121256	50680.4	5874.48	76574.1	10011.2	57154	93180	12562.3	71625.8	388194	102333	6.5877e+06	1.03378e+07	3.75006e+06				8406.88	11851.4	4004.96	2734.97	6777.82	1008.42
2074	51760.1	35543.2	215377	50147.5	19367	1.04577e+06	54008.2	5361.92	189530	281164	382534	5986.41	1.68108e+06	316458	92578	86713	30213.2	103882	137162	46499.3	6137.24	487514	6829.94	44160.9	176925	34274.7	120785	50682.5	5852.3	76583.7	10022.4	56661.4	92875	12596.4	71626.2	388703	101959	6.57533e+06	1.0352e+07	3.7767e+06				8386.58	11841.9	3957.08	2708.78	6793.52	1001.01
2075	51666	35660.9	214277	50323.4	19276.6	1.03462e+06	53747.8	5335.09	190469	283418	380974	6029.14	1.67781e+06	316042	92070	86064.5	30396	104440	136563	46471.7	6139.37	491187	6849.06	44155	177373	33819.2	120324	50683.6	5830.32	76584.6	10033.4	56171.2	92564	12632.2	71623.6	389171	101581	6.56238e+06	1.03651e+07	3.8027e+06				8365.94	11832.3	3910.08	2682.77	6809.06	993.632
2076	51564	35776	213156	50493	19184.9	1.02345e+06	53478.1	5307.39	191380	285633	379444	6070.59	1.67426e+06	315594	91559	85435	30578.6	104973	135936	46438.1	6141.12	494711	6867.74	44141.8	177792	33369.1	119878	50684.7	5808.72	76575.2	10044.6	55683	92247	12669.7	71615.2	389610	101196	6.54875e+06	1.03769e+07	3.82816e+06				8345.12	11822.3	3864.04	2656.95	6824.24	986.34
2077	51456.6	35887.6	212022	50658.3	19091.1	1.01227e+06	53198.8	5278.72	192258	287798	377941	6110.39	1.6704e+06	315114	91047	84824.3	30759.3	105488	135290	46399.8	6142.27	498139	6886.05	44119.9	178175	32924.2	119444	50685.2	5787.47	76559.6	10055.7	55196.6	91924	12708.4	71602	390012	100811	6.53446e+06	1.03875e+07	3.85299e+06				8324.12	11811.7	3819	2631.35	6838.99	979.127
2078	51344.8	35995.6	210869	50819	18995.7	1.00106e+06	52912	5249.27	193108	289906	376462	6148.95	1.6663e+06	314608	90535	84234.2	30940	105981	134620	46355.7	6142.7	501450	6904.25	44091.6	178534	32484.5	119022	50686.5	5766.55	76537.2	10066.8	54711.8	91593	12748.9	71584.9	390387	100421	6.51958e+06	1.03967e+07	3.87713e+06				8302.81	11800.8	3774.8	2606.03	6853.11	971.945
2079	51225.3	36100.6	209707	50975.7	18898.9	989817	52618.2	5219.19	193927	291968	375005	6186.5	1.6619e+06	314076	90023	83662.6	31118.5	106461	133931	46305.2	6142.87	504639	6921.78	44056.1	178857	32050.3	118614	50690.7	5745.81	76508.4	10078.5	54228.5	91256	12790.5	71561.3	390731	100028	6.50402e+06	1.04048e+07	3.90076e+06				8281.47	11789.6	3731.49	2580.94	6866.96	964.869
2080	51102.1	36202.8	208533	51128.7	18800.7	978554	52316	5188.5	194725	293983	373579	6222.55	1.65729e+06	313510	89515	83106.3	31294.9	106918	133223	46249.5	6142.45	507728	6938.7	44014.1	179160	31620.7	118220	50694.1	5725.43	76468.5	10090.1	53746.4	90910	12834.8	71532.5	391034	99632.2	6.48793e+06	1.04117e+07	3.92382e+06				8260.25	11777.7	3689.11	2556.24	6880.08	957.89
2081	50970.1	36303	207346	51276.4	18701	967260	52007.9	5157.26	195499	295938	372174	6257.23	1.65243e+06	312922	89007	82566.9	31471.4	107357	132492	46189	6141.4	510695	6954.77	43966.4	179437	31195.9	117841	50700.3	5705.56	76422.3	10101.8	53263.1	90557	12881	71499.3	391303	99231	6.47122e+06	1.04175e+07	3.94631e+06				8238.94	11765.2	3647.59	2531.86	6892.56	950.967
2082	50833.2	36399.8	206152	51421.4	18600.4	955966	51694.9	5125.44	196251	297845	370789	6290.92	1.6473e+06	312306	88506	82043.8	31646.3	107782	131744	46122.8	6140.02	513561	6970.18	43911.4	179689	30776.7	117471	50708.6	5685.98	76370.7	10113.9	52783.1	90203	12929.3	71458.8	391546	98827.6	6.45397e+06	1.04222e+07	3.96821e+06				8218.13	11752.4	3606.97	2507.87	6904.6	944.129
2083	50689.9	36493.4	204954	51562.6	18498.5	944710	51380.2	5093.19	196981	299710	369427	6323.03	1.64206e+06	311664	88010	81531.2	31817.6	108190	130972	46049.8	6138.15	516313	6985.09	43852.3	179908	30362.8	117113	50716.1	5667.07	76311.3	10126	52305.5	89841	12980.1	71412.9	391760	98419.2	6.43632e+06	1.04259e+07	3.98955e+06				8197.24	11739.2	3567.18	2484.17	6916	937.425
2084	50542.2	36584.3	203760	51702.4	18396.5	933490	51060.8	5060.71	197684	301521	368088	6353.56	1.63667e+06	310992	87518	81029.6	31985.8	108581	130187	45970.2	6136.04	518941	6999.34	43788.3	180105	29952.8	116767	50723.6	5648.76	76250.3	10139.2	51830.4	89472	13032.4	71365.5	391954	98011.8	6.4183e+06	1.04286e+07	4.01028e+06				8176.78	11725.4	3528.23	2460.86	6926.69	930.837
2085	50388.7	36674.5	202559	51838.6	18294.3	922335	50739.2	5028.15	198355	303277	366768	6382.46	1.6311e+06	310292	87031	80539.3	32152.7	108957	129385	45885.9	6133.48	521482	7013.19	43720.1	180279	29547.9	116435	50730.7	5631	76183.1	10152.5	51357.8	89096	13087	71313.6	392131	97606	6.39989e+06	1.04303e+07	4.03043e+06				8156.42	11711.4	3490.09	2437.87	6937.1	924.388
2086	50230.1	36765.1	201358	51971.4	18191.8	911283	50414.8	4995.37	199013	304977	365469	6410.04	1.62538e+06	309548	86555	80056.3	32314.8	109316	128567	45796.1	6130.46	523889	7026.52	43646.9	180424	29146.6	116114	50738.3	5613.63	76110	10166.2	50886.5	88714	13143.6	71259.5	392288	97193.2	6.3811e+06	1.0431e+07	4.04994e+06				8136.69	11697	3452.64	2415.21	6947.09	918.062
2087	50067.6	36852.8	200164	52103.2	18088.8	900359	50087.7	4962.42	199639	306631	364192	6436.49	1.61947e+06	308780	86084	79579.4	32474.9	109652	127737	45701.6	6127.03	526147	7039.6	43568.7	180552	28750.5	115802	50743.7	5596.79	76034	10180.3	50418.4	88326	13202.1	71201.9	392439	96778.2	6.36198e+06	1.04308e+07	4.06883e+06				8117.45	11682.5	3415.96	2392.75	6956.75	911.856
2088	49899.8	36940.1	198968	52233.4	17986.6	889561	49761.4	4929.53	200242	308220	362934	6461.14	1.61343e+06	308002	85619	79109.4	32630	109973	126892	45602	6123.48	528306	7052.7	43487.1	180659	28358.5	115503	50747.9	5580.54	75955.5	10195.2	49952.9	87931	13262.4	71143.5	392571	96362.4	6.34259e+06	1.04297e+07	4.08714e+06				8098.92	11668.5	3379.96	2370.6	6966.16	905.751
2089	49727.6	37026.1	197780	52361.6	17884.6	878927	49436	4896.7	200815	309758	361695	6485.16	1.6073e+06	307199	85158	78646.2	32779.4	110276	126035	45497.3	6119.89	530351	7065.83	43402.5	180746	27971.3	115211	50748.5	5564.91	75871.7	10211	49491.9	87526	13324	71085.7	392700	95943.6	6.32302e+06	1.04279e+07	4.10491e+06				8081.05	11654.8	3344.46	2348.71	6975.44	899.802
2090	49552.5	37112.3	196595	52489.2	17782.9	868463	49110.3	4864.07	201357	311243	360479	6507.57	1.60109e+06	306374	84704	78186	32923.2	110563	125169	45387.3	6115.8	532285	7078.97	43311.8	180807	27589.6	114926	50747	5550.07	75783.1	10227.4	49034.5	87116	13387	71027.6	392827	95524.2	6.30329e+06	1.04253e+07	4.12198e+06				8064.19	11641.6	3309.31	2327.16	6984.9	893.947
2091	49374.4	37199.8	195411	52616.3	17682	858176	48784.9	4831.61	201862	312673	359282	6528.75	1.59473e+06	305523	84250	77732.6	33061.4	110830	124295	45271.8	6111.75	534100	7092.36	43216.6	180851	27215.2	114645	50741.7	5535.83	75690.1	10244.6	48581.2	86704	13451.1	70971.4	392938	95102.4	6.28331e+06	1.04218e+07	4.13851e+06				8048.44	11628.7	3274.51	2305.73	6994.2	888.186
2092	49192.2	37288.5	194233	52744.9	17582.8	848047	48462.9	4799.37	202337	314054	358101	6548.72	1.58824e+06	304650	83801	77282.1	33193.3	111076	123408	45153.3	6107.45	535828	7105.73	43115.6	180866	26847.2	114372	50732.5	5522.32	75591.9	10262.6	48133.6	86285	13516.5	70915	393060	94679.5	6.26314e+06	1.04175e+07	4.15434e+06				8033.51	11616.1	3239.85	2284.57	7003.6	882.504
2093	49008.3	37378.3	193062	52875.2	17484.7	838087	48142.8	4767.12	202785	315405	356938	6567.09	1.58165e+06	303772	83355	76836.4	33319.1	111304	122511	45029.4	6103.1	537444	7119.03	43011.8	180859	26487.8	114103	50718.7	5509.59	75485.7	10281.6	47690.9	85861	13583	70859.6	393178	94256.4	6.24283e+06	1.04124e+07	4.16961e+06				8019.77	11604	3205.2	2263.6	7013.26	876.911
2094	48821.8	37470.4	191899	53007.1	17388.1	828238	47825	4735.25	203210	316694	355795	6584.19	1.57495e+06	302867	82907	76394.1	33441	111518	121607	44900.1	6098.76	538934	7132.57	42903.6	180824	26137.6	113835	50701.3	5497.7	75376.9	10301.1	47254.2	85431	13650.2	70806.4	393295	93833.4	6.22226e+06	1.04065e+07	4.18428e+06				8007.16	11592.7	3170.6	2242.86	7023.12	871.361
2095	48632.2	37563.2	190744	53141.3	17293.5	818524	47510.4	4703.48	203607	317932	354664	6600.22	1.56819e+06	301961	82459	75956.9	33556.4	111709	120696	44767.2	6094.37	540334	7146.05	42790.9	180775	25796.5	113565	50679.8	5487.02	75262.8	10321.5	46822.8	84994	13718	70754.8	393413	93409.2	6.20158e+06	1.04e+07	4.19842e+06				7995.5	11581.4	3136	2222.33	7033.24	865.859
2096	48441.2	37656.8	189593	53276.4	17199.8	808913	47198.7	4671.88	203971	319107	353547	6615.17	1.5614e+06	301023	82007	75525.3	33666.4	111886	119781	44627.5	6089.93	541607	7159.44	42674.1	180706	25466.1	113295	50654.2	5477.19	75144.7	10342.2	46397.4	84556	13785.7	70704.2	393535	92984.4	6.18069e+06	1.03926e+07	4.21192e+06				7984.68	11569.9	3101.27	2202.07	7043.58	860.405
2097	48248.8	37753	188458	53412.9	17107.5	799394	46890.2	4640.65	204305	320226	352441	6628.99	1.55449e+06	300062	81548	75096.1	33771.8	112045	118862	44482.2	6085.4	542799	7172.79	42554.6	180622	25145.7	113022	50623.4	5468.41	75023.6	10363.3	45978.6	84116	13853.1	70656.1	393671	92554.9	6.15957e+06	1.03844e+07	4.22485e+06				7974.89	11559.2	3066.46	2182.05	7054.28	854.918
2098	48054.2	37848.7	187335	53552.6	17017.3	789953	46585	4609.58	204603	321295	351344	6641.28	1.54751e+06	299095	81085	74673.4	33870.4	112198	117941	44332	6080.68	543863	7186.11	42429.3	180515	24835.1	112750	50586	5460.69	74896.2	10384.9	45567.9	83671	13920.3	70606	393787	92124.4	6.13821e+06	1.03754e+07	4.23714e+06				7965.66	11548.4	3031.47	2162.25	7065.26	849.466
2099	47857.9	37943.8	186215	53692	16928.6	780588	46284	4578.83	204879	322316	350259	6652.64	1.54047e+06	298117	80616	74258	33963.6	112337	117015	44177.1	6076.11	544833	7199.66	42300.9	180384	24534.6	112476	50543.6	5454.15	74764.7	10406.8	45164.1	83225	13987.8	70559	393899	91691.5	6.11665e+06	1.03655e+07	4.24889e+06				7957.24	11537.6	2996.3	2142.73	7076.39	843.968
2100	47660.7	38041	185102	53832.3	16841.5	771301	45984.7	4548.13	205119	323283	349183	6662.78	1.5334e+06	297128	80145	73845.9	34052.1	112466	116090	44016.2	6071.55	545706	7213.15	42169.7	180236	24243.6	112204	50496.1	5448.66	74630.5	10428.6	44766.7	82775	14055.3	70510.8	393993	91255.4	6.09491e+06	1.0355e+07	4.2601e+06				7949.4	11526.7	2961.12	2123.44	7087.84	838.473
																																						0
Aggregated population 1990-2021	1.24937e+06	664653	5.91449e+06	1.03898e+06	518253	4.16977e+07	1.33886e+06	135988	2.57366e+06	2.545e+06	1.38534e+07	55272.3	3.66554e+07	7.31196e+06	2271225	4.04994e+06	534622	1.1723e+06	3.35853e+06	978221	132507	4.64039e+06	151410	889820	2.76365e+06	1.53604e+06	4.66443e+06	817960	145169	1.58146e+06	242478	2.07916e+06	2209660	176067	1.96052e+06	9.45131e+06	2.65084e+06	1.64011e+08	2.10393e+08	4.63826e+07
Aggregated population 1990-2070	3.70785e+06	2.18881e+06	1.69982e+07	3.22238e+06	1.51106e+06	1.06036e+08	4.06073e+06	408169	9.97084e+06	1.23025e+07	3.46844e+07	266995	1.15715e+08	2.23748e+07	6967788	9.29861e+06	1.7359e+06	5.06566e+06	1.01903e+07	3.10566e+06	416584	2.17474e+07	454579	2.86568e+06	1.01007e+07	3.79963e+06	1.12563e+07	3.05663e+06	450385	5.03861e+06	710090	5.40447e+06	6761223	718046	5.42144e+06	2.74839e+07	7.78005e+06	4.83277e+08	6.68742e+08	1.85465e+08
Aggregated population 2022-2070	2.45848e+06	1.52416e+06	1.10837e+07	2.1834e+06	992807	6.43382e+07	2.72188e+06	272181	7.39719e+06	9.75754e+06	2.08311e+07	211723	7.90597e+07	1.50628e+07	4696563	5.24867e+06	1.20128e+06	3.89336e+06	6.83178e+06	2.12744e+06	284078	1.7107e+07	303169	1.97586e+06	7.33709e+06	2.26358e+06	6.59189e+06	2.23867e+06	305216	3.45714e+06	467611	3.32531e+06	4551563	541979	3.46092e+06	1.80326e+07	5.12921e+06	3.19267e+08	4.58349e+08	1.39082e+08
Share of world population 2021	0.00573366	0.00327487	0.0271461	0.00482665	0.00246212	0.181017	0.00650562	0.000652646	0.0137606	0.0150748	0.0565183	0.000330959	0.178091	0.0346442	0.0111198	0.0158624	0.00242448	0.00666647	0.0160451	0.00468313	0.000646923	0.0267711	0.000684495	0.00425537	0.0143577	0.00658013	0.0184682	0.00454038	0.000752351	0.00750771	0.00110078	0.009085	0.0107223	0.00118409	0.00852715	0.0427191	0.0123263		1	0.242931
Share of world population 1990-2021	0.00593828	0.0031591	0.0281116	0.00493827	0.00246326	0.198189	0.00636359	0.00064635	0.0122326	0.0120964	0.0658452	0.000262709	0.174223	0.0347538	0.0107951	0.0192494	0.00254106	0.00557194	0.0159631	0.00464949	0.000629805	0.0220558	0.000719655	0.00422932	0.0131356	0.00730082	0.0221701	0.00388777	0.000689988	0.0075167	0.0011525	0.00988226	0.0105025	0.000836848	0.00931836	0.0449221	0.0125994		1	0.220457
Share of world population 1990-2070	0.00554451	0.00327303	0.0254182	0.00481857	0.00225955	0.15856	0.0060722	0.000610353	0.0149098	0.0183965	0.0518652	0.00039925	0.173034	0.033458	0.0104192	0.0139046	0.00259577	0.00757491	0.015238	0.00464403	0.000622937	0.0325199	0.000679753	0.00428517	0.0151041	0.00568175	0.0168321	0.00457071	0.000673481	0.00753446	0.00106183	0.00808155	0.0101104	0.00107373	0.00810692	0.0410979	0.0116339		1	0.277334
Share of world population 2022-2070	0.00536376	0.00332532	0.0241819	0.00476362	0.00216605	0.140369	0.00593844	0.00059383	0.0161388	0.0212885	0.045448	0.000461925	0.172488	0.0328632	0.0102467	0.0114513	0.00262088	0.00849431	0.0149052	0.00464153	0.000619785	0.0373231	0.000661437	0.00431081	0.0160077	0.00493856	0.0143818	0.0048842	0.000665904	0.0075426	0.00102021	0.00725498	0.00993035	0.00118246	0.00755085	0.0393424	0.0111906		1	0.303441
[truncated: 22 more columns]

## Sheet: GDP and costs
Assumed cost per tonne removed in USD	100
GDP (current US$)	2021	Fair National Carbon Accountability	Cost of responsibility	Share of 2021 GDP		Military expenditures share of GDP 2021	Military expenditures in current USD 202 (Sipri)		Country	Population 2021 (thousands)	Population 2021	GDP per capita
Argentina	4.87227e+11	1045.99	1.04599e+11	0.214682		0.00630794	3073.4		Argentina	45163.6	45163623	10788
Australia	1.5527e+12	10218.2	1.02182e+12	0.658093		0.0210717	32718.1		Australia	25795.9	25795922	60191.8
Brazil	1.64962e+12			0					Brazil	213828	213827672	7714.73
Canada	2.00149e+12	13518.2	1.35182e+12	0.675408		0.0126717	25362.2		Canada	38019.2	38019178	52644.1
Chile	3.16714e+11	405.466	4.05466e+10	0.128023		0.0193216	6119.4		Chile	19393.9	19393941	16330.5
China	1.78205e+13	176256	1.76256e+13	0.989063		0.0160451	285930		China	1.42586e+06	1425861543	12498
Colombia	3.18512e+11			0					Colombia	51244.3	51244297	6215.56
Costa Rica	6.46165e+10			0					Costa Rica	5140.85	5140851	12569.2
Egypt	4.24672e+11			0					Egypt	108392	108391549	3917.94
Ethiopia	1.11262e+11			0					Ethiopia	118743	118743462	936.994
EU 27	1.71879e+13	52798.4	5.27984e+12	0.307184		0.013			EU 27	445191	4.45191e+08	38607.9
Gambia	2.03841e+09			0					Gambia	2606.94	2606941	781.918
India	3.15031e+12			0		0.0242353	76348.5		India	1.40281e+06	1402807867	2245.72
Indonesia	1.18651e+12			0					Indonesia	272890	272890093	4347.92
Iran	3.59097e+11	16986.5	1.69865e+12	4.73035					Iran	87590	87590000	4099.75
Japan	5.00554e+12	23872.7	2.38727e+12	0.476927		0.0101802	50957.5		Japan	124947	124946751	40061.4
Kazakhstan	1.97112e+11	7656.12	7.65612e+11	3.88414		0.00820751	1617.8		Kazakhstan	19097.4	19097429	10321.4
Kenya	1.09704e+11			0					Kenya	52511.3	52511349	2089.14
Mexico	1.27284e+12	6729.32	6.72932e+11	0.528686		0.00682003	8680.8		Mexico	126386	126386142	10071
Morocco	1.42867e+11			0					Morocco	36888.7	36888700	3872.91
New Zealand	2.55552e+11	558.682	5.58682e+10	0.218618		0.0113699	2905.6		New Zealand	5095.77	5095771	50149.8
Nigeria	4.40834e+11			0					Nigeria	210874	210874214	2090.5
Norway	4.90293e+11	651.452	6.51452e+10	0.13287		0.0172042	8435.1		Norway	5391.72	5391723	90934.4
Peru	2.23718e+11			0					Peru	33519.2	33519231	6674.31
Philippines	3.94087e+11			0					Philippines	113094	113094332	3484.59
Russia	1.83689e+12	53491	5.3491e+12	2.91204		0.03588	65907.7		Russian Federation	145473	145472994	12627
Saudi Arabia	8.68586e+11	17428.5	1.74285e+12	2.00654		0.0727558	63194.7		Saudi Arabia	35764.2	35764241	24286.4
Singapore	4.23797e+11	1200.12	1.20012e+11	0.283182		0.0260851	11054.8		Singapore	5926.22	5926220	71512.2
South Africa	4.19016e+11	7879.02	7.87902e+11	1.88036		0.0080997	3393.9		South Africa	59137.7	59137710	7085.42
South Korea	1.81096e+12	12949.5	1.29495e+12	0.715063		0.0280922	50873.8		South Korea	51831.3	51831253	34939.5
Switzerland	8.0064e+11	411.059	4.11059e+10	0.0513413		0.00776129	6214		Switzerland	8670.8	8670795	92337.6
Thailand	5.05568e+11	2425.22	2.42522e+11	0.479702		0.0130904	6618.1		Thailand	71562	71561955	7064.76
Turkey	8.19034e+11	5123.83	5.12383e+11	0.625593		0.019007	15567.4		Turkey	84459	84459000	9697.42
United Arab Emirates	4.15022e+11	6425.45	6.42545e+11	1.54822		0.0548287	22755.1		United Arab Emirates	9327.03	9327028	44496.7
United Kingdom	3.12248e+12	7058.55	7.05855e+11	0.226056		0.0216177	67500.7		United Kingdom	67167.8	67167774	46487.8
United States	23315080560000	140141	1.40141e+13	0.601077		0.0345798	806230		United States of america	336496	336495769	69287.9
Viet Nam	3.66138e+11								Viet Nam	97093.8	97093774	3770.97
											0
									ROW	1.91355e+06	1.91355e+09
									WORLD	7.87693e+06	7876931987

## Sheet: Our world in data CO2
country	year	population	co2
Afghanistan	1850	3752993
Afghanistan	1851	3767956
Afghanistan	1852	3783940
Afghanistan	1853	3800954
Afghanistan	1854	3818038
Afghanistan	1855	3835192
Afghanistan	1856	3852417
Afghanistan	1857	3869714
Afghanistan	1858	3887081
Afghanistan	1859	3904521
Afghanistan	1860	3922032
Afghanistan	1861	3939616
Afghanistan	1862	3957271
Afghanistan	1863	3975000
Afghanistan	1864	3992801
Afghanistan	1865	4010675
Afghanistan	1866	4028623
Afghanistan	1867	4046645
Afghanistan	1868	4064740
Afghanistan	1869	4082915
Afghanistan	1870	4101170
Afghanistan	1871	4119504
Afghanistan	1872	4137920
Afghanistan	1873	4156416
Afghanistan	1874	4174988
Afghanistan	1875	4193635
Afghanistan	1876	4212359
Afghanistan	1877	4231159
Afghanistan	1878	4250036
Afghanistan	1879	4268990
Afghanistan	1880	4288021
Afghanistan	1881	4307129
Afghanistan	1882	4326316
Afghanistan	1883	4345580
Afghanistan	1884	4364922
Afghanistan	1885	4384343
Afghanistan	1886	4403843
Afghanistan	1887	4423422
Afghanistan	1888	4443080
Afghanistan	1889	4462817
Afghanistan	1890	4482635
Afghanistan	1891	4502532
Afghanistan	1892	4522510
Afghanistan	1893	4542568
Afghanistan	1894	4562708
Afghanistan	1895	4582928
Afghanistan	1896	4603230
Afghanistan	1897	4623613
Afghanistan	1898	4644079
Afghanistan	1899	4672084
Afghanistan	1900	4707744
Afghanistan	1901	4751177
Afghanistan	1902	4802500
Afghanistan	1903	4861833
Afghanistan	1904	4921891
Afghanistan	1905	4982681
Afghanistan	1906	5044212
Afghanistan	1907	5106495
Afghanistan	1908	5169536
Afghanistan	1909	5300178
Afghanistan	1910	5504191
Afghanistan	1911	5787792
Afghanistan	1912	6157669
Afghanistan	1913	6621025
Afghanistan	1914	7119235
Afghanistan	1915	7654918
Afghanistan	1916	8230894
Afghanistan	1917	8850190
Afghanistan	1918	9529174
Afghanistan	1919	9976355
Afghanistan	1920	10188845
Afghanistan	1921	10162753
Afghanistan	1922	9893152
Afghanistan	1923	9374030
Afghanistan	1924	8882148
Afghanistan	1925	8416077
Afghanistan	1926	7974462
Afghanistan	1927	7556019
Afghanistan	1928	7159534
Afghanistan	1929	6851115
Afghanistan	1930	6626142
Afghanistan	1931	6480237
Afghanistan	1932	6409250
Afghanistan	1933	6409250
Afghanistan	1934	6409250
Afghanistan	1935	6409250
Afghanistan	1936	6409250
Afghanistan	1937	6409250
Afghanistan	1938	6409250
Afghanistan	1939	6428903
Afghanistan	1940	6468510
Afghanistan	1941	6528377
Afghanistan	1942	6608815
Afghanistan	1943	6710138
Afghanistan	1944	6813016
Afghanistan	1945	6917471
Afghanistan	1946	7023527
Afghanistan	1947	7131209
Afghanistan	1948	7240542
Afghanistan	1949	7356890	0.015
Afghanistan	1950	7480464	0.084
Afghanistan	1951	7571542	0.092
Afghanistan	1952	7667534	0.092
Afghanistan	1953	7764549	0.106
Afghanistan	1954	7864289	0.106
Afghanistan	1955	7971933	0.154
Afghanistan	1956	8087730	0.183
Afghanistan	1957	8210207	0.293
Afghanistan	1958	8333827	0.33
Afghanistan	1959	8468220	0.385
Afghanistan	1960	8622473	0.414
Afghanistan	1961	8790140	0.491
Afghanistan	1962	8969055	0.689
Afghanistan	1963	9157463	0.707
Afghanistan	1964	9355510	0.839
Afghanistan	1965	9565154	1.007
Afghanistan	1966	9783153	1.091
Afghanistan	1967	10010037	1.282
Afghanistan	1968	10247782	1.223
Afghanistan	1969	10494491	0.941
Afghanistan	1970	10752973	1.67
Afghanistan	1971	11015853	1.894
Afghanistan	1972	11286753	1.53
Afghanistan	1973	11575308	1.635
Afghanistan	1974	11869881	1.913
Afghanistan	1975	12157390	2.121
Afghanistan	1976	12425276	1.981
Afghanistan	1977	12687308	2.384
Afghanistan	1978	12938864	2.153
Afghanistan	1979	12986378	2.233
Afghanistan	1980	12486640	1.756
Afghanistan	1981	11155196	1.978
Afghanistan	1982	10088290	2.095
Afghanistan	1983	9951447	2.52
Afghanistan	1984	10243689	2.822
Afghanistan	1985	10512220	3.501
Afghanistan	1986	10448447	3.134
Afghanistan	1987	10322767	3.114
Afghanistan	1988	10383459	2.857
Afghanistan	1989	10673172	2.765
Afghanistan	1990	10694804	2.024
Afghanistan	1991	10745168	1.914
Afghanistan	1992	12057436	1.482
Afghanistan	1993	14003764	1.487
Afghanistan	1994	15455560	1.454
Afghanistan	1995	16418911	1.417
Afghanistan	1996	17106600	1.37
Afghanistan	1997	17788818	1.304
Afghanistan	1998	18493134	1.279
Afghanistan	1999	19262854	1.092
Afghanistan	2000	19542986	1.047
Afghanistan	2001	19688634	1.069
Afghanistan	2002	21000258	1.341
Afghanistan	2003	22645136	1.56
Afghanistan	2004	23553554	1.237
Afghanistan	2005	24411196	1.89
Afghanistan	2006	25442946	2.159
Afghanistan	2007	25903306	2.8
Afghanistan	2008	26427204	4.254
Afghanistan	2009	27385310	6.392
Afghanistan	2010	28189672	8.365
Afghanistan	2011	29249156	11.838
Afghanistan	2012	30466484	10.035
Afghanistan	2013	31541216	9.251
Afghanistan	2014	32716214	9.17
Afghanistan	2015	33753500	9.791
Afghanistan	2016	34636212	9.068
Afghanistan	2017	35643420	9.868
Afghanistan	2018	36686788	10.818
Afghanistan	2019	37769496	11.082
Afghanistan	2020	38972236	11.682
Afghanistan	2021	40099460	11.874
Africa	1750	76278087	0
Africa	1751		0
Africa	1752		0
Africa	1753		0
Africa	1754		0
Africa	1755		0
Africa	1756		0
Africa	1757		0
Africa	1758		0
Africa	1759		0
Africa	1760	76943010	0
Africa	1761		0
Africa	1762		0
Africa	1763		0
Africa	1764		0
Africa	1765		0
Africa	1766		0
Africa	1767		0
Africa	1768		0
Africa	1769		0
Africa	1770	77667559	0
Africa	1771		0
Africa	1772		0
Africa	1773		0
Africa	1774		0
Africa	1775		0
Africa	1776		0
Africa	1777		0
Africa	1778		0
Africa	1779		0
Africa	1780	78459476	0
Africa	1781		0
Africa	1782		0
Africa	1783		0
Africa	1784		0
Africa	1785		0
Africa	1786		0
Africa	1787		0
Africa	1788		0
Africa	1789		0
Africa	1790	79313390	0
Africa	1791		0
Africa	1792		0
Africa	1793		0
Africa	1794		0
Africa	1795		0
Africa	1796		0
Africa	1797		0
Africa	1798		0
Africa	1799		0
Africa	1800	81273172	0
Africa	1801	81313551	0
Africa	1802	81418900	0
Africa	1803	81525621	0
Africa	1804	81633731	0
Africa	1805	81743247	0
Africa	1806	81854174	0
Africa	1807	81966528	0
Africa	1808	82080332	0
Africa	1809	82195596	0
Africa	1810	82385589	0
Africa	1811	82440934	0
Africa	1812	82579573	0
Africa	1813	82729616	0
Africa	1814	82891459	0
Africa	1815	83065241	0
Africa	1816	83251124	0
Africa	1817	83449261	0
Africa	1818	83659804	0
Africa	1819	83954434	0
Africa	1820	84418699	0
Africa	1821	84811641	0
Africa	1822	85376766	0
Africa	1823	86056105	0
Africa	1824	86755919	0
Africa	1825	87476538	0
Africa	1826	88218276	0
Africa	1827	88981474	0
Africa	1828	89766472	0
Africa	1829	90573904	0
Africa	1830	91494029	0
Africa	1831	92257560	0
Africa	1832	93125349	0
Africa	1833	94007792	0
Africa	1834	94904834	0
Africa	1835	95816766	0
Africa	1836	96743850	0
Africa	1837	97686357	0
Africa	1838	98644581	0
Africa	1839	99638115	0
Africa	1840	100772650	0
Africa	1841	101734515	0
Africa	1842	102839146	0
Africa	1843	103982621	0
Africa	1844	105146559	0
Africa	1845	106331394	0
Africa	1846	107537534	0
Africa	1847	108765412	0
Africa	1848	110015469	0
Africa	1849	111156406	0
Africa	1850	112295370	0
Africa	1851	112843149	0
Africa	1852	113379285	0
Africa	1853	113793047	0
Africa	1854	114216849	0
Africa	1855	114631842	0
Africa	1856	115057009	0
Africa	1857	115486119	0
Africa	1858	115919245	0
Africa	1859	116365125	0
Africa	1860	116988636	0
Africa	1861	117301876	0
Africa	1862	117778853	0
Africa	1863	118275288	0
Africa	1864	118775558	0
Africa	1865	119279686	0
Africa	1866	119787704	0
Africa	1867	120299649	0
Africa	1868	120815545	0
Africa	1869	121347692	0
Africa	1870	122079985	0
Africa	1871	122466078	0
Africa	1872	123041990	0
Africa	1873	123641171	0
Africa	1874	124245323	0
Africa	1875	124854484	0
Africa	1876	125468701	0
Africa	1877	126088007	0
Africa	1878	126712451	0
Africa	1879	127352247	0
Africa	1880	128189317	0
Africa	1881	128683453	0
Africa	1882	129364909	0
Africa	1883	130067281	0
Africa	1884	130775459	0.022
Africa	1885	131489484	0.037
Africa	1886	132209404	0.048
Africa	1887	132935290	0.048
Africa	1888	133667182	0.081
Africa	1889	134316240	0.132
Africa	1890	135050718	0.297
Africa	1891	135370390	0.297
Africa	1892	135768025	0.48
Africa	1893	136087369	1.799
Africa	1894	136413556	2.433
Africa	1895	136746634	3.338
Africa	1896	137086659	4.258
Africa	1897	137433669	4.778
Africa	1898	137787711	6.049
Africa	1899	138168883	5.518
Africa	1900	138752199	2.33
Africa	1901	139021447	3.909
Africa	1902	139489077	5.826
Africa	1903	139992790	7.896
Africa	1904	140510536	8.911
Africa	1905	141042447	10.263
Africa	1906	141588654	11.717
Africa	1907	142149308	12.93
Africa	1908	142724535	13.403
Africa	1909	143305202	15.385
Africa	1910	144064903	17.411
Africa	1911	144480832	16.865
Africa	1912	145067004	17.954
Africa	1913	145657208	19.606
Africa	1914	146256012	19.551
Africa	1915	146863516	19.606
Africa	1916	147479796	23.255
Africa	1917	148104957	25.344
Africa	1918	148713464	24.725
Africa	1919	149572638	25.443
Africa	1920	150861520	28.052
Africa	1921	152062212	27.986
Africa	1922	153693154	23.97
Africa	1923	155594335	29.045
Africa	1924	157523780	30.631
Africa	1925	159481926	32.185
Africa	1926	161469210	34.438
Africa	1927	163486087	33.841
Africa	1928	165533025	34.77
Africa	1929	167612506	35.802
Africa	1930	169924067	33.696
Africa	1931	171875191	29.464
Africa	1932	174050964	26.623
Africa	1933	176265430	28.491
Africa	1934	178512860	32.539
Africa	1935	180793768	35.91
Africa	1936	183108678	39.016
Africa	1937	185458104	41.844
Africa	1938	187842584	44.013
Africa	1939	190381812	46.853
Africa	1940	193306256	49.649
Africa	1941	195943401	54.023
Africa	1942	198975492	58.823
Africa	1943	202181814	60.12
Africa	1944	205448384	66.633
Africa	1945	208776384	67.527
Africa	1946	212172008	68.159
Africa	1947	215621479	67.935
Africa	1948	219141050	71.733
Africa	1949	223001287	77.324
Africa	1950	227549730	93.452
Africa	1951	232484439	99.862
Africa	1952	237586485	108.882
Africa	1953	242837870	110.796
Africa	1954	248245229	116.157
Africa	1955	253848117	128.058
Africa	1956	259631766	133.509
Africa	1957	265515596	139.953
Africa	1958	271429963	148.305
Africa	1959	277648583	147.911
Africa	1960	284288223	156.64
Africa	1961	291177974	162.079
Africa	1962	298334455	166.426
Africa	1963	305755585	176.448
Africa	1964	313466087	193.764
Africa	1965	321447378	213.785
Africa	1966	329658389	221.262
Africa	1967	338159967	237.258
Africa	1968	346980412	257.6
Africa	1969	356070643	278.139
Africa	1970	365450443	302.943
Africa	1971	375086296	332.204
Africa	1972	384930776	352.239
Africa	1973	395212420	378.421
Africa	1974	406069208	388.865
Africa	1975	417556976	387.829
Africa	1976	429573262	420.857
Africa	1977	441701768	433.845
Africa	1978	454463053	463.267
Africa	1979	467976240	499.992
Africa	1980	481543145	536.49
Africa	1981	495655683	549.365
Africa	1982	510540596	572.577
Africa	1983	525335348	595.413
Africa	1984	540183119	650.254
Africa	1985	555652995	666.655
Africa	1986	571646786	690.671
Africa	1987	588080029	690.763
Africa	1988	604511530	726.007
Africa	1989	621167964	699.179
Africa	1990	638157571	659.297
Africa	1991	655040869	688.954
Africa	1992	671931834	668.606
Africa	1993	689140286	708.741
Africa	1994	706488557	719.465
Africa	1995	724331972	771.882
Africa	1996	742765067	783.332
Africa	1997	761224818	812.606
Africa	1998	779908311	837.844
Africa	1999	799099611	830.411
Africa	2000	818952374	886.403
Africa	2001	839464127	884
Africa	2002	860611762	892.559
Africa	2003	882349569	967.17
Africa	2004	904781595	1036.64
Africa	2005	927898412	1057.36
Africa	2006	951740562	1090.14
Africa	2007	976461747	1132.29
Africa	2008	1001981577	1181.17
Africa	2009	1028200528	1171.78
Africa	2010	1055233717	1214.75
Africa	2011	1082676070	1251.31
Africa	2012	1110797495	1259.54
Africa	2013	1140180888	1268.89
Africa	2014	1170299297	1350.09
Africa	2015	1201108186	1323.76
Africa	2016	1232111820	1363.46
Africa	2017	1263333997	1379.49
Africa	2018	1295265310	1366.41
Africa	2019	1327701380	1467.49
Africa	2020	1360677453	1385.89
Africa	2021	1393676724	1450.8
Africa (GCP)	1850		0
Africa (GCP)	1851		0
Africa (GCP)	1852		0
Africa (GCP)	1853		0
Africa (GCP)	1854		0
Africa (GCP)	1855		0
Africa (GCP)	1856		0
Africa (GCP)	1857		0
Africa (GCP)	1858		0
Africa (GCP)	1859		0
Africa (GCP)	1860		0
Africa (GCP)	1861		0
Africa (GCP)	1862		0
Africa (GCP)	1863		0
Africa (GCP)	1864		0
Africa (GCP)	1865		0
Africa (GCP)	1866		0
Africa (GCP)	1867		0
Africa (GCP)	1868		0
Africa (GCP)	1869		0
Africa (GCP)	1870		0
Africa (GCP)	1871		0
Africa (GCP)	1872		0
Africa (GCP)	1873		0
Africa (GCP)	1874		0
Africa (GCP)	1875		0
Africa (GCP)	1876		0
Africa (GCP)	1877		0
Africa (GCP)	1878		0
Africa (GCP)	1879		0
Africa (GCP)	1880		0
Africa (GCP)	1881		0
Africa (GCP)	1882		0
Africa (GCP)	1883		0
Africa (GCP)	1884		0.022
Africa (GCP)	1885		0.037
Africa (GCP)	1886		0.048
Africa (GCP)	1887		0.048
Africa (GCP)	1888		0.081
Africa (GCP)	1889		0.132
Africa (GCP)	1890		0.297
Africa (GCP)	1891		0.297
Africa (GCP)	1892		0.48
Africa (GCP)	1893		1.799
Africa (GCP)	1894		2.433
Africa (GCP)	1895		3.338
Africa (GCP)	1896		4.258
Africa (GCP)	1897		4.778
Africa (GCP)	1898		6.049
Africa (GCP)	1899		5.518
Africa (GCP)	1900		2.33
Africa (GCP)	1901		3.909
Africa (GCP)	1902		5.826
Africa (GCP)	1903		7.896
Africa (GCP)	1904		8.911
Africa (GCP)	1905		10.263
Africa (GCP)	1906		11.717
Africa (GCP)	1907		12.93
Africa (GCP)	1908		13.403
Africa (GCP)	1909		15.385
Africa (GCP)	1910		17.411
Africa (GCP)	1911		16.865
Africa (GCP)	1912		17.954
Africa (GCP)	1913		19.606
Africa (GCP)	1914		19.551
Africa (GCP)	1915		19.606
Africa (GCP)	1916		23.255
Africa (GCP)	1917		25.344
Africa (GCP)	1918		24.725
Africa (GCP)	1919		25.443
Africa (GCP)	1920		28.052
Africa (GCP)	1921		27.986
Africa (GCP)	1922		23.97
Africa (GCP)	1923		29.045
Africa (GCP)	1924		30.631
Africa (GCP)	1925		32.185
Africa (GCP)	1926		34.438
Africa (GCP)	1927		33.841
Africa (GCP)	1928		34.77
Africa (GCP)	1929		35.802
Africa (GCP)	1930		33.696
Africa (GCP)	1931		29.464
Africa (GCP)	1932		26.623
Africa (GCP)	1933		28.491
Africa (GCP)	1934		32.539
Africa (GCP)	1935		35.91
Africa (GCP)	1936		39.016
Africa (GCP)	1937		41.844
Africa (GCP)	1938		44.013
Africa (GCP)	1939		46.853
Africa (GCP)	1940		49.649
Africa (GCP)	1941		54.023
Africa (GCP)	1942		58.823
Africa (GCP)	1943		60.12
Africa (GCP)	1944		66.633
Africa (GCP)	1945		67.527
Africa (GCP)	1946		68.159
Africa (GCP)	1947		67.935
Africa (GCP)	1948		71.733
Africa (GCP)	1949		77.345
Africa (GCP)	1950		94.925
Africa (GCP)	1951		101.181
Africa (GCP)	1952		110.399
Africa (GCP)	1953		112.06
Africa (GCP)	1954		117.615
Africa (GCP)	1955		129.509
Africa (GCP)	1956		135.227
Africa (GCP)	1957		141.73
Africa (GCP)	1958		148.733
Africa (GCP)	1959		147.911
Africa (GCP)	1960		156.64
Africa (GCP)	1961		162.079
Africa (GCP)	1962		166.426
Africa (GCP)	1963		176.448
Africa (GCP)	1964		193.764
Africa (GCP)	1965		213.785
Africa (GCP)	1966		221.262
Africa (GCP)	1967		237.258
Africa (GCP)	1968		257.597
Africa (GCP)	1969		278.139
Africa (GCP)	1970		302.943
Africa (GCP)	1971		332.204
Africa (GCP)	1972		352.239
Africa (GCP)	1973		378.421
Africa (GCP)	1974		388.865
Africa (GCP)	1975		387.829
Africa (GCP)	1976		420.857
Africa (GCP)	1977		433.845
Africa (GCP)	1978		463.267
Africa (GCP)	1979		499.992
Africa (GCP)	1980		536.49
Africa (GCP)	1981		549.358
Africa (GCP)	1982		572.573
Africa (GCP)	1983		595.41
Africa (GCP)	1984		650.251
Africa (GCP)	1985		666.651
Africa (GCP)	1986		690.667
Africa (GCP)	1987		690.759
Africa (GCP)	1988		725.999
Africa (GCP)	1989		699.172
Africa (GCP)	1990		659.29
Africa (GCP)	1991		688.946
Africa (GCP)	1992		668.599
Africa (GCP)	1993		708.73
Africa (GCP)	1994		719.454
Africa (GCP)	1995		771.871
Africa (GCP)	1996		783.321
Africa (GCP)	1997		812.595
Africa (GCP)	1998		837.833
Africa (GCP)	1999		830.4
Africa (GCP)	2000		886.392
Africa (GCP)	2001		883.989
Africa (GCP)	2002		892.548
Africa (GCP)	2003		967.159
Africa (GCP)	2004		1036.63
Africa (GCP)	2005		1057.35
Africa (GCP)	2006		1090.13
Africa (GCP)	2007		1132.28
Africa (GCP)	2008		1181.16
Africa (GCP)	2009		1171.77
Africa (GCP)	2010		1214.74
Africa (GCP)	2011		1251.3
Africa (GCP)	2012		1259.53
Africa (GCP)	2013		1268.88
Africa (GCP)	2014		1350.08
Africa (GCP)	2015		1323.75
Africa (GCP)	2016		1363.44
Africa (GCP)	2017		1379.48
Africa (GCP)	2018		1366.4
Africa (GCP)	2019		1467.48
Africa (GCP)	2020		1385.88
Africa (GCP)	2021		1450.78
Aland Islands	1850
Aland Islands	1851
Aland Islands	1852
Aland Islands	1853
Aland Islands	1854
Aland Islands	1855
Aland Islands	1856
Aland Islands	1857
Aland Islands	1858
Aland Islands	1859
Aland Islands	1860
Aland Islands	1861
Aland Islands	1862
Aland Islands	1863
Aland Islands	1864
Aland Islands	1865
Aland Islands	1866
Aland Islands	1867
Aland Islands	1868
Aland Islands	1869
Aland Islands	1870
Aland Islands	1871
Aland Islands	1872
Aland Islands	1873
Aland Islands	1874
Aland Islands	1875
Aland Islands	1876
Aland Islands	1877
Aland Islands	1878
Aland Islands	1879
Aland Islands	1880
Aland Islands	1881
Aland Islands	1882
Aland Islands	1883
Aland Islands	1884
Aland Islands	1885
Aland Islands	1886
Aland Islands	1887
Aland Islands	1888
Aland Islands	1889
Aland Islands	1890
Aland Islands	1891
Aland Islands	1892
Aland Islands	1893
Aland Islands	1894
Aland Islands	1895
Aland Islands	1896
Aland Islands	1897
Aland Islands	1898
Aland Islands	1899
Aland Islands	1900
Aland Islands	1901
Aland Islands	1902
Aland Islands	1903
Aland Islands	1904
Aland Islands	1905
Aland Islands	1906
Aland Islands	1907
Aland Islands	1908
Aland Islands	1909
Aland Islands	1910
Aland Islands	1911
Aland Islands	1912
Aland Islands	1913
Aland Islands	1914
Aland Islands	1915
Aland Islands	1916
Aland Islands	1917
Aland Islands	1918
Aland Islands	1919
Aland Islands	1920
Aland Islands	1921
Aland Islands	1922
Aland Islands	1923
Aland Islands	1924
Aland Islands	1925
Aland Islands	1926
Aland Islands	1927
Aland Islands	1928
Aland Islands	1929
Aland Islands	1930
Aland Islands	1931
Aland Islands	1932
Aland Islands	1933
Aland Islands	1934
Aland Islands	1935
Aland Islands	1936
Aland Islands	1937
Aland Islands	1938
Aland Islands	1939
Aland Islands	1940
Aland Islands	1941
Aland Islands	1942
Aland Islands	1943
Aland Islands	1944
Aland Islands	1945
Aland Islands	1946
Aland Islands	1947
Aland Islands	1948
Aland Islands	1949
Aland Islands	1950
Aland Islands	1951
Aland Islands	1952
Aland Islands	1953
Aland Islands	1954
Aland Islands	1955
Aland Islands	1956
Aland Islands	1957
Aland Islands	1958
Aland Islands	1959
Aland Islands	1960
Aland Islands	1961
Aland Islands	1962
Aland Islands	1963
Aland Islands	1964
Aland Islands	1965
Aland Islands	1966
Aland Islands	1967
Aland Islands	1968
Aland Islands	1969
Aland Islands	1970
Aland Islands	1971
Aland Islands	1972
Aland Islands	1973
Aland Islands	1974
Aland Islands	1975
Aland Islands	1976
Aland Islands	1977
Aland Islands	1978
Aland Islands	1979
Aland Islands	1980
Aland Islands	1981
Aland Islands	1982
Aland Islands	1983
Aland Islands	1984
Aland Islands	1985
Aland Islands	1986
Aland Islands	1987
Aland Islands	1988
Aland Islands	1989
Aland Islands	1990
Aland Islands	1991
Aland Islands	1992
Aland Islands	1993
Aland Islands	1994
Aland Islands	1995
Aland Islands	1996
Aland Islands	1997
Aland Islands	1998
Aland Islands	1999
Aland Islands	2000
Aland Islands	2001
Aland Islands	2002
Aland Islands	2003
Aland Islands	2004
Aland Islands	2005
Aland Islands	2006
Aland Islands	2007
Aland Islands	2008
Aland Islands	2009
Aland Islands	2010
Aland Islands	2011
Aland Islands	2012
Aland Islands	2013
Aland Islands	2014
Aland Islands	2015
Aland Islands	2016
Aland Islands	2017
Aland Islands	2018
Aland Islands	2019
Aland Islands	2020
Aland Islands	2021
Albania	1850	501490
Albania	1851	505313
Albania	1852	509659
Albania	1853	514536
Albania	1854	519460
Albania	1855	524430
Albania	1856	529449
Albania	1857	534515
Albania	1858	539629
Albania	1859	544793
Albania	1860	550006
Albania	1861	555269
Albania	1862	560582
Albania	1863	565946
Albania	1864	571361
Albania	1865	576828
Albania	1866	582348
Albania	1867	587920
Albania	1868	593546
Albania	1869	599215
Albania	1870	604928
Albania	1871	610685
Albania	1872	616487
Albania	1873	622333
Albania	1874	628235
Albania	1875	634193
Albania	1876	640208
Albania	1877	646279
Albania	1878	652408
Albania	1879	658596
Albania	1880	664842
Albania	1881	671147
Albania	1882	677511
Albania	1883	683937
Albania	1884	690423
Albania	1885	696970
Albania	1886	703580
Albania	1887	710252
Albania	1888	716988
Albania	1889	723850
Albania	1890	730840
Albania	1891	737961
Albania	1892	745214
Albania	1893	752600
Albania	1894	760060
Albania	1895	767593
Albania	1896	775202
Albania	1897	782885
Albania	1898	790645
Albania	1899	798342
Albania	1900	805974
Albania	1901	813539
Albania	1902	821036
Albania	1903	828461
Albania	1904	835954
Albania	1905	843514
Albania	1906	851143
Albania	1907	858841
Albania	1908	866609
Albania	1909	874016
Albania	1910	881057
Albania	1911	887724
Albania	1912	894013
Albania	1913	899917
Albania	1914	905859
Albania	1915	911841
Albania	1916	917862
Albania	1917	923923
Albania	1918	929879
Albania	1919	935646
Albania	1920	941221
Albania	1921	946603
Albania	1922	951788
Albania	1923	956775
Albania	1924	961788
Albania	1925	966828
Albania	1926	971893
Albania	1927	976986
Albania	1928	982104
Albania	1929	988255
Albania	1930	995454
Albania	1931	1003716
Albania	1932	1013057
Albania	1933	1023495	0.007
Albania	1934	1034040	0.007
Albania	1935	1044694	0.018
Albania	1936	1055458	0.128
Albania	1937	1066333	0.297
Albania	1938	1077319	0.348
Albania	1939	1088816	0.432
Albania	1940	1100833	0.692
Albania	1941	1113381	0.626
Albania	1942	1126469	0.744
Albania	1943	1140109	0.462
Albania	1944	1153914	0.154
Albania	1945	1167887	0.121
Albania	1946	1182028	0.484
Albania	1947	1196341	0.927
Albania	1948	1210827	0.703
Albania	1949	1229519	1.015
Albania	1950	1252587	0.297
Albania	1951	1289175	0.403
Albania	1952	1326957	0.374
Albania	1953	1366747	0.414
Albania	1954	1409011	0.502
Albania	1955	1453732	0.663
Albania	1956	1500625	0.839
Albania	1957	1549575	1.506
Albania	1958	1600986	1.201
Albania	1959	1655022	1.443
Albania	1960	1711189	2.022
Albania	1961	1769076	2.279
Albania	1962	1828234	2.462
Albania	1963	1888302	2.081
Albania	1964	1949020	2.015
Albania	1965	2009793	2.172
Albania	1966	2070694	2.55
Albania	1967	2132447	2.677
Albania	1968	2195474	3.069
Albania	1969	2259797	3.241
Albania	1970	2324733	3.739
Albania	1971	2389820	4.348
Albania	1972	2455181	5.638
Albania	1973	2520442	5.286
Albania	1974	2585457	4.342
Albania	1975	2650128	4.591
Albania	1976	2713564	4.947
Albania	1977	2774798	5.717
Albania	1978	2833317	6.491
Albania	1979	2888764	7.584
Albania	1980	2941650	5.171
Albania	1981	2992391	7.34
Albania	1982	3041188	7.308
Albania	1983	3087904	7.631
Albania	1984	3131731	7.826
Albania	1985	3171727	7.882
Albania	1986	3207129	8.058
Albania	1987	3237677	7.447
Albania	1988	3263019	7.329
Albania	1989	3282187	8.986
Albania	1990	3295073	5.521
Albania	1991	3302087	4.29
Albania	1992	3303738	2.517
Albania	1993	3300715	2.338
Albania	1994	3294001	1.924
Albania	1995	3284370	2.089
Albania	1996	3271336	2.018
Albania	1997	3253721	1.543
Albania	1998	3232185	1.755
Albania	1999	3208265	2.986
Albania	2000	3182027	3.025
Albania	2001	3153615	3.221
Albania	2002	3123554	3.748
Albania	2003	3092993	4.303
Albania	2004	3062629	4.177
Albania	2005	3032636	4.261
Albania	2006	3003391	3.911
Albania	2007	2976089	3.949
Albania	2008	2951690	4.397
Albania	2009	2930553	4.407
Albania	2010	2913402	4.784
Albania	2011	2900660	5.315
Albania	2012	2892191	4.85
Albania	2013	2887019	5.287
Albania	2014	2884100	6
Albania	2015	2882482	4.712
Albania	2016	2881064	4.632
Albania	2017	2879361	5.564
Albania	2018	2877019	4.984
Albania	2019	2873883	4.947
Albania	2020	2866850	4.729
Albania	2021	2854710	4.619
Algeria	1850	2852648
Algeria	1851	2872405
Algeria	1852	2897058
Algeria	1853	2926664
Algeria	1854	2956573
Algeria	1855	2986788
Algeria	1856	3017311
Algeria	1857	3048147
Algeria	1858	3079297
Algeria	1859	3110766
Algeria	1860	3142556
Algeria	1861	3174671
Algeria	1862	3207115
Algeria	1863	3239889
Algeria	1864	3272999
Algeria	1865	3306447
Algeria	1866	3340237
Algeria	1867	3374372
Algeria	1868	3408856
Algeria	1869	3443692
Algeria	1870	3478884
Algeria	1871	3514436
Algeria	1872	3550350
Algeria	1873	3586632
Algeria	1874	3623285
Algeria	1875	3660312
Algeria	1876	3697718
Algeria	1877	3735505
Algeria	1878	3773679
Algeria	1879	3812243
Algeria	1880	3851201
Algeria	1881	3890557
Algeria	1882	3930315
Algeria	1883	3970479
Algeria	1884	4011054
Algeria	1885	4052043
Algeria	1886	4093452
Algeria	1887	4135283
Algeria	1888	4177542
Algeria	1889	4219933
Algeria	1890	4262454
Algeria	1891	4305104
Algeria	1892	4347882
Algeria	1893	4390784
Algeria	1894	4434110
Algeria	1895	4477863
Algeria	1896	4522048
Algeria	1897	4566669
Algeria	1898	4611731
Algeria	1899	4663386
Algeria	1900	4721802
Algeria	1901	4787149
Algeria	1902	4859600
Algeria	1903	4939332
Algeria	1904	5020372
Algeria	1905	5102742
Algeria	1906	5186463
Algeria	1907	5271557
Algeria	1908	5358048
Algeria	1909	5433528
Algeria	1910	5497750
Algeria	1911	5550464
Algeria	1912	5591415
Algeria	1913	5620343
Algeria	1914	5649420
Algeria	1915	5678648
Algeria	1916	5708027	0.004
Algeria	1917	5737558	0.007
Algeria	1918	5766569	0.018
Algeria	1919	5802743	0.018
Algeria	1920	5846192	0.022
Algeria	1921	5897033	0.026
Algeria	1922	5955381	0.026
Algeria	1923	6021355	0.015
Algeria	1924	6088060	0.029
Algeria	1925	6155505	0.033
Algeria	1926	6223696	0.04
Algeria	1927	6292643	0.059
Algeria	1928	6362353	0.073
Algeria	1929	6441431	0.08
Algeria	1930	6530132	0.084
Algeria	1931	6628718	0.099
Algeria	1932	6737455	0.113
Algeria	1933	6856617	0.121
Algeria	1934	6977885	0.139
Algeria	1935	7101299	0.132
Algeria	1936	7226895	0.051
Algeria	1937	7354713	0.069
Algeria	1938	7484792	0.033
Algeria	1939	7613042	0.161
Algeria	1940	7739370	0.238
Algeria	1941	7863680	0.311
Algeria	1942	7985870	0.498
Algeria	1943	8105839	0.469
Algeria	1944	8227611	0.498
Algeria	1945	8351211	0.615
Algeria	1946	8476669	0.762
Algeria	1947	8604011	0.743
Algeria	1948	8733267	0.802
Algeria	1949	8871792	0.908
Algeria	1950	9019866	3.784
Algeria	1951	9271741	4.131
Algeria	1952	9521703	3.889
Algeria	1953	9771686	3.999
Algeria	1954	10011548	4.152
Algeria	1955	10242297	4.607
Algeria	1956	10473167	4.995
Algeria	1957	10703259	5.537
Algeria	1958	10933788	5.214
Algeria	1959	11164451	5.657
Algeria	1960	11394309	6.151
Algeria	1961	11598615	6.056
Algeria	1962	11778265	5.661
Algeria	1963	11969449	5.419
Algeria	1964	12179097	5.643
Algeria	1965	12381262	6.589
Algeria	1966	12613398	8.421
Algeria	1967	12897121	8.432
Algeria	1968	13190979	9.05
Algeria	1969	13491022	11.263
Algeria	1970	13795915	15.059
Algeria	1971	14110269	18.65
Algeria	1972	14439750	28.323
Algeria	1973	14786473	38.277
Algeria	1974	15153601	31.877
Algeria	1975	15724698	32.001
Algeria	1976	16500516	39.131
Algeria	1977	17134196	41.845
Algeria	1978	17632646	62.455
Algeria	1979	18166982	45.546
Algeria	1980	18739378	66.416
Algeria	1981	19351356	46.342
Algeria	1982	20000098	39.173
Algeria	1983	20682110	52.504
Algeria	1984	21393532	70.947
Algeria	1985	22132910	72.609
Algeria	1986	22882560	76.08
Algeria	1987	23586098	83.883
Algeria	1988	24243024	83.708
Algeria	1989	24889516	79.808
Algeria	1990	25518074	76.738
Algeria	1991	26133906	78.807
Algeria	1992	26748302	79.883
Algeria	1993	27354326	81.944
Algeria	1994	27937006	86.147
Algeria	1995	28478024	94.981
Algeria	1996	28984640	96.786
Algeria	1997	29476030	87.005
Algeria	1998	29924664	106.621
Algeria	1999	30346086	91.668
Algeria	2000	30774624	82.221
Algeria	2001	31200984	83.78
Algeria	2002	31624700	89.407
Algeria	2003	32055882	91.048
Algeria	2004	32510184	87.853
Algeria	2005	32956690	106.473
Algeria	2006	33435082	100.203
Algeria	2007	33983836	108.402
Algeria	2008	34569592	109.032
Algeria	2009	35196040	120.185
Algeria	2010	35856348	117.813
Algeria	2011	36543548	119.808
Algeria	2012	37260568	135.674
Algeria	2013	38000628	140.786
Algeria	2014	38760168	151.283
Algeria	2015	39543148	160.087
Algeria	2016	40339328	158.748
Algeria	2017	41136548	166.411
Algeria	2018	41927008	173.912
Algeria	2019	42705372	179.505
Algeria	2020	43451668	172.504
Algeria	2021	44177964	176.269
American Samoa	1850	3927
American Samoa	1851
American Samoa	1852
American Samoa	1853
American Samoa	1854
American Samoa	1855
American Samoa	1856
American Samoa	1857
American Samoa	1858
American Samoa	1859
American Samoa	1860	4145
American Samoa	1861
American Samoa	1862
American Samoa	1863
American Samoa	1864
American Samoa	1865
American Samoa	1866
American Samoa	1867
American Samoa	1868
American Samoa	1869
American Samoa	1870	4663
American Samoa	1871
American Samoa	1872
American Samoa	1873
American Samoa	1874
American Samoa	1875
American Samoa	1876
American Samoa	1877
American Samoa	1878
American Samoa	1879
American Samoa	1880	5246
American Samoa	1881
American Samoa	1882
American Samoa	1883
American Samoa	1884
American Samoa	1885
American Samoa	1886
American Samoa	1887
American Samoa	1888
American Samoa	1889
American Samoa	1890	5902
American Samoa	1891
American Samoa	1892
American Samoa	1893
American Samoa	1894
American Samoa	1895
American Samoa	1896
American Samoa	1897
American Samoa	1898
American Samoa	1899
American Samoa	1900	6639
American Samoa	1901
American Samoa	1902
American Samoa	1903
American Samoa	1904
American Samoa	1905
American Samoa	1906
American Samoa	1907
American Samoa	1908
American Samoa	1909
American Samoa	1910	7469
American Samoa	1911
American Samoa	1912
American Samoa	1913
American Samoa	1914
American Samoa	1915
American Samoa	1916
American Samoa	1917
American Samoa	1918
American Samoa	1919
American Samoa	1920	8963
American Samoa	1921
American Samoa	1922
American Samoa	1923
American Samoa	1924
American Samoa	1925
American Samoa	1926
American Samoa	1927
American Samoa	1928
American Samoa	1929
American Samoa	1930	10756
American Samoa	1931
American Samoa	1932
American Samoa	1933
American Samoa	1934
American Samoa	1935
American Samoa	1936
American Samoa	1937
American Samoa	1938
American Samoa	1939
American Samoa	1940	12908
American Samoa	1941
American Samoa	1942
American Samoa	1943
American Samoa	1944
American Samoa	1945
American Samoa	1946
American Samoa	1947
American Samoa	1948
American Samoa	1949
American Samoa	1950	19057
American Samoa	1951	19447
American Samoa	1952	19587
American Samoa	1953	19695
American Samoa	1954	19783
American Samoa	1955	19855
American Samoa	1956	19922
American Samoa	1957	19965
American Samoa	1958	19942
American Samoa	1959	19904
American Samoa	1960	20107
American Samoa	1961	20653
American Samoa	1962	21290
American Samoa	1963	21969
American Samoa	1964	22682
American Samoa	1965	23414
American Samoa	1966	24147
American Samoa	1967	24864
American Samoa	1968	25631
American Samoa	1969	26417
American Samoa	1970	27098
American Samoa	1971	27618
American Samoa	1972	28083
American Samoa	1973	28553
American Samoa	1974	29040
American Samoa	1975	29596
American Samoa	1976	30222
American Samoa	1977	30838
American Samoa	1978	31449
American Samoa	1979	32071
American Samoa	1980	32908
American Samoa	1981	34080
American Samoa	1982	35388
American Samoa	1983	36755
American Samoa	1984	38193
American Samoa	1985	39688
American Samoa	1986	41240
American Samoa	1987	42859
American Samoa	1988	44564
American Samoa	1989	46310
American Samoa	1990	47841
American Samoa	1991	49016
American Samoa	1992	50096
American Samoa	1993	51195
American Samoa	1994	52311
American Samoa	1995	53421
American Samoa	1996	54523
American Samoa	1997	55595
American Samoa	1998	56626
American Samoa	1999	57617
American Samoa	2000	58251
American Samoa	2001	58342
American Samoa	2002	58200
American Samoa	2003	57962
American Samoa	2004	57653
American Samoa	2005	57277
American Samoa	2006	56857
American Samoa	2007	56402
American Samoa	2008	55909
American Samoa	2009	55386
American Samoa	2010	54871
American Samoa	2011	54334
American Samoa	2012	53718
American Samoa	2013	53017
American Samoa	2014	52234
American Samoa	2015	51391
American Samoa	2016	50468
American Samoa	2017	49486
American Samoa	2018	48445
American Samoa	2019	47341
American Samoa	2020	46216
American Samoa	2021	45056
Andorra	1750	2221	0
Andorra	1751		0
Andorra	1752		0
Andorra	1753		0
Andorra	1754		0
Andorra	1755		0
Andorra	1756		0
Andorra	1757		0
Andorra	1758		0
Andorra	1759		0
Andorra	1760	2338	0
Andorra	1761		0
Andorra	1762		0
Andorra	1763		0
Andorra	1764		0
Andorra	1765		0
Andorra	1766		0
Andorra	1767		0
Andorra	1768		0
Andorra	1769		0
Andorra	1770	2461	0
Andorra	1771		0
Andorra	1772		0
Andorra	1773		0
Andorra	1774		0
Andorra	1775		0
Andorra	1776		0
Andorra	1777		0
Andorra	1778		0
Andorra	1779		0
Andorra	1780	2591	0
Andorra	1781		0
Andorra	1782		0
Andorra	1783		0
Andorra	1784		0
Andorra	1785		0
Andorra	1786		0
Andorra	1787		0
Andorra	1788		0
Andorra	1789		0
Andorra	1790	2727	0
Andorra	1791		0
Andorra	1792		0
Andorra	1793		0
Andorra	1794		0
Andorra	1795		0
Andorra	1796		0
Andorra	1797		0
Andorra	1798		0
Andorra	1799		0
Andorra	1800	2654	0
Andorra	1801	2654	0
Andorra	1802	2654	0
Andorra	1803	2654	0
Andorra	1804	2654	0
Andorra	1805	2654	0
Andorra	1806	2654	0
Andorra	1807	2654	0
Andorra	1808	2654	0
Andorra	1809	2654	0
Andorra	1810	2654	0
Andorra	1811	2654	0
Andorra	1812	2654	0
Andorra	1813	2654	0
Andorra	1814	2654	0
Andorra	1815	2654	0
Andorra	1816	2654	0
Andorra	1817	2654	0
Andorra	1818	2654	0
Andorra	1819	2658	0
Andorra	1820	2665	0
Andorra	1821	2677	0
Andorra	1822	2692	0
Andorra	1823	2711	0
Andorra	1824	2730	0
Andorra	1825	2749	0
Andorra	1826	2769	0
Andorra	1827	2788	0
Andorra	1828	2808	0
Andorra	1829	2828	0
Andorra	1830	2848	0
Andorra	1831	2868	0
Andorra	1832	2888	0
Andorra	1833	2908	0
Andorra	1834	2929	0
Andorra	1835	2950	0
Andorra	1836	2970	0
Andorra	1837	2991	0
Andorra	1838	3013	0
Andorra	1839	3034	0
Andorra	1840	3055	0
Andorra	1841	3077	0
Andorra	1842	3099	0
Andorra	1843	3120	0
Andorra	1844	3142	0
Andorra	1845	3165	0
Andorra	1846	3187	0
Andorra	1847	3210	0
Andorra	1848	3232	0
Andorra	1849	3255	0
Andorra	1850	3278	0
Andorra	1851	3299	0
Andorra	1852	3321	0
Andorra	1853	3342	0
Andorra	1854	3364	0
Andorra	1855	3385	0
Andorra	1856	3407	0
Andorra	1857	3429	0
Andorra	1858	3451	0
Andorra	1859	3474	0
Andorra	1860	3496	0
Andorra	1861	3519	0
Andorra	1862	3541	0
Andorra	1863	3564	0
Andorra	1864	3587	0
Andorra	1865	3611	0
Andorra	1866	3634	0
Andorra	1867	3657	0
Andorra	1868	3681	0
Andorra	1869	3705	0
Andorra	1870	3729	0
Andorra	1871	3753	0
Andorra	1872	3777	0
Andorra	1873	3801	0
Andorra	1874	3826	0
Andorra	1875	3851	0
Andorra	1876	3875	0
Andorra	1877	3900	0
Andorra	1878	3926	0
Andorra	1879	3951	0
Andorra	1880	3976	0
Andorra	1881	4002	0
Andorra	1882	4028	0
Andorra	1883	4054	0
Andorra	1884	4080	0
Andorra	1885	4106	0
Andorra	1886	4133	0
Andorra	1887	4160	0
Andorra	1888	4186	0
Andorra	1889	4213	0
Andorra	1890	4241	0
Andorra	1891	4268	0
Andorra	1892	4295	0
Andorra	1893	4323	0
Andorra	1894	4351	0
Andorra	1895	4379	0
Andorra	1896	4407	0
Andorra	1897	4436	0
Andorra	1898	4464	0
Andorra	1899	4493	0
Andorra	1900	4522	0
Andorra	1901	4551	0
Andorra	1902	4581	0
Andorra	1903	4610	0
Andorra	1904	4640	0
Andorra	1905	4670	0
Andorra	1906	4700	0
Andorra	1907	4730	0
Andorra	1908	4761	0
Andorra	1909	4802	0
Andorra	1910	4855	0
Andorra	1911	4920	0
Andorra	1912	4996	0
Andorra	1913	5085	0
Andorra	1914	5176	0
Andorra	1915	5268	0
Andorra	1916	5361	0
Andorra	1917	5456	0
Andorra	1918	5557	0
Andorra	1919	5617	0
Andorra	1920	5637	0
Andorra	1921	5617	0
Andorra	1922	5557	0
Andorra	1923	5456	0
Andorra	1924	5358	0
Andorra	1925	5261	0
Andorra	1926	5166	0
Andorra	1927	5073	0
Andorra	1928	4981	0
Andorra	1929	4919	0
Andorra	1930	4885	0
Andorra	1931	4880	0
Andorra	1932	4904	0
Andorra	1933	4956	0
Andorra	1934	5009	0
Andorra	1935	5062	0
Andorra	1936	5116	0
Andorra	1937	5170	0
Andorra	1938	5225	0
Andorra	1939	5280	0
Andorra	1940	5337	0
Andorra	1941	5393	0
Andorra	1942	5450	0
Andorra	1943	5508	0
Andorra	1944	5567	0
Andorra	1945	5626	0
Andorra	1946	5686	0
Andorra	1947	5746	0
Andorra	1948	5807	0
Andorra	1949	5893	0
Andorra	1950	6028	0
Andorra	1951	5848	0
Andorra	1952	5475	0
Andorra	1953	5335	0
Andorra	1954	5590	0
Andorra	1955	6139	0
Andorra	1956	6730	0
Andorra	1957	7353	0
Andorra	1958	8020	0
Andorra	1959	8723	0
Andorra	1960	9473	0
Andorra	1961	10238	0
Andorra	1962	11037	0
Andorra	1963	11865	0
Andorra	1964	12718	0
Andorra	1965	13585	0
Andorra	1966	14569	0
Andorra	1967	15768	0
Andorra	1968	17103	0
Andorra	1969	18471	0
Andorra	1970	19885	0
Andorra	1971	21346	0
Andorra	1972	22855	0
Andorra	1973	24413	0
Andorra	1974	26025	0
Andorra	1975	27664	0
Andorra	1976	29314	0
Andorra	1977	30971	0
Andorra	1978	32597	0
Andorra	1979	34167	0
Andorra	1980	35639	0
Andorra	1981	37008	0
Andorra	1982	38617	0
Andorra	1983	40456	0
Andorra	1984	42202	0
Andorra	1985	43834	0
Andorra	1986	45625	0
Andorra	1987	47659	0
Andorra	1988	49680	0
Andorra	1989	51661	0
Andorra	1990	53590	0.407
Andorra	1991	55455	0.407
Andorra	1992	57305	0.407
Andorra	1993	59177	0.41
Andorra	1994	61057	0.407
Andorra	1995	62944	0.425
Andorra	1996	64166	0.454
Andorra	1997	64702	0.465
Andorra	1998	65204	0.491
Andorra	1999	65675	0.513
Andorra	2000	66116	0.524
Andorra	2001	67841	0.524
Andorra	2002	70868	0.531
Andorra	2003	73929	0.535
Andorra	2004	76950	0.561
Andorra	2005	79845	0.575
Andorra	2006	80241	0.546
Andorra	2007	78187	0.539
Andorra	2008	76073	0.539
Andorra	2009	73879	0.517
Andorra	2010	71542	0.517
Andorra	2011	70587	0.491
Andorra	2012	71035	0.487
Andorra	2013	71385	0.476
Andorra	2014	71644	0.462
Andorra	2015	71766	0.465
Andorra	2016	72563	0.469
Andorra	2017	73853	0.465
Andorra	2018	75034	0.495
Andorra	2019	76361	0.48
Andorra	2020	77723	0.449
Andorra	2021	79057	0.453
Angola	1850	2418020
Angola	1851	2445025
Angola	1852	2468568
Angola	1853	2488555
Angola	1854	2508701
Angola	1855	2529007
Angola	1856	2549474
Angola	1857	2570102
Angola	1858	2590895
Angola	1859	2611894
Angola	1860	2633102
Angola	1861	2654522
Angola	1862	2676155
Angola	1863	2698003
Angola	1864	2720026
Angola	1865	2742225
Angola	1866	2764601
Angola	1867	2787156
Angola	1868	2809892
Angola	1869	2831694
Angola	1870	2852547
Angola	1871	2872435
Angola	1872	2891341
Angola	1873	2909249
Angola	1874	2927264
Angola	1875	2945386
Angola	1876	2963618
Angola	1877	2981958
Angola	1878	3000408
Angola	1879	3018954
Angola	1880	3037598
Angola	1881	3056340
Angola	1882	3075181
Angola	1883	3094120
Angola	1884	3113172
Angola	1885	3132337
Angola	1886	3151616
Angola	1887	3171010
Angola	1888	3190519
Angola	1889	3203693
Angola	1890	3210508
Angola	1891	3210945
Angola	1892	3204981
Angola	1893	3192595
Angola	1894	3180253
Angola	1895	3167955
Angola	1896	3155700
Angola	1897	3143489
Angola	1898	3131321
Angola	1899	3117320
Angola	1900	3101503
Angola	1901	3083888
Angola	1902	3064493
Angola	1903	3043335
Angola	1904	3022320
Angola	1905	3001447
Angola	1906	2980714
Angola	1907	2960121
Angola	1908	2939666
Angola	1909	2921666
Angola	1910	2906100
Angola	1911	2892945
Angola	1912	2882183
Angola	1913	2873791
Angola	1914	2865420
Angola	1915	2857070
Angola	1916	2848742
Angola	1917	2840434
Angola	1918	2829072
Angola	1919	2828420
Angola	1920	2838595
Angola	1921	2859717
Angola	1922	2891905
Angola	1923	2935284
Angola	1924	2979313
Angola	1925	3024003
Angola	1926	3069363
Angola	1927	3115404
Angola	1928	3162135
Angola	1929	3208915
Angola	1930	3255737
Angola	1931	3302592
Angola	1932	3349470
Angola	1933	3396362
Angola	1934	3443911
Angola	1935	3492126
Angola	1936	3541016
Angola	1937	3590590
Angola	1938	3640858
Angola	1939	3694824
Angola	1940	3752594
Angola	1941	3814276
Angola	1942	3879980
Angola	1943	3949820
Angola	1944	4020916
Angola	1945	4093293
Angola	1946	4166972
Angola	1947	4241977
Angola	1948	4318333
Angola	1949	4397048
Angola	1950	4478186	0.187
Angola	1951	4569744	0.249
Angola	1952	4663968	0.311
Angola	1953	4758721	0.275
Angola	1954	4850457	0.348
Angola	1955	4938121	0.414
Angola	1956	5022111	0.502
Angola	1957	5104334	0.619
Angola	1958	5185843	0.593
Angola	1959	5269954	0.619
Angola	1960	5357201	0.549
Angola	1961	5441328	0.454
Angola	1962	5521405	1.179
Angola	1963	5599831	1.15
Angola	1964	5673208	1.223
Angola	1965	5736588	1.186
Angola	1966	5787056	1.552
Angola	1967	5827502	0.992
Angola	1968	5868201	1.67
Angola	1969	5928387	2.783
Angola	1970	6029702	3.578
Angola	1971	6177053	3.405
Angola	1972	6364736	4.501
Angola	1973	6578237	4.874
Angola	1974	6802495	4.866
Angola	1975	7032728	4.409
Angola	1976	7266788	3.28
Angola	1977	7511898	3.528
Angola	1978	7771595	5.4
Angola	1979	8043223	5.489
Angola	1980	8330053	5.334
Angola	1981	8631461	5.267
Angola	1982	8947154	4.635
Angola	1983	9276704	5.101
Angola	1984	9617709	4.986
Angola	1985	9970631	4.676
Angola	1986	10332577	4.634
Angola	1987	10694060	5.786
Angola	1988	11060263	5.049
Angola	1989	11439505	4.923
Angola	1990	11828643	5.09
Angola	1991	12228698	5.064
Angola	1992	12632509	5.164
Angola	1993	13038277	5.748
Angola	1994	13462032	3.865
Angola	1995	13912258	10.949
Angola	1996	14383352	10.424
Angola	1997	14871148	7.348
Angola	1998	15366866	7.268
Angola	1999	15870759	9.13
Angola	2000	16394067	9.516
Angola	2001	16941584	9.671
Angola	2002	17516140	12.598
Angola	2003	18124346	8.989
Angola	2004	18771128	18.701
Angola	2005	19450962	19.006
Angola	2006	20162338	22.102
Angola	2007	20909692	24.977
Angola	2008	21691524	25.486
Angola	2009	22507674	27.565
Angola	2010	23364196	28.865
Angola	2011	24259120	30.33
Angola	2012	25188298	25.54
Angola	2013	26147012	24.719
Angola	2014	27128340	25.148
Angola	2015	28127724	25.531
Angola	2016	29154742	27.21
Angola	2017	30208634	24.304
Angola	2018	31273538	22.779
Angola	2019	32353592	21.818
Angola	2020	33428490	20.276
Angola	2021	34503776	21.363
Anguilla	1850	3071
Anguilla	1851
Anguilla	1852
Anguilla	1853
Anguilla	1854
Anguilla	1855
Anguilla	1856
Anguilla	1857
Anguilla	1858
Anguilla	1859
Anguilla	1860	2965
Anguilla	1861
Anguilla	1862
Anguilla	1863
Anguilla	1864
Anguilla	1865
Anguilla	1866
Anguilla	1867
Anguilla	1868
Anguilla	1869
Anguilla	1870	2815
Anguilla	1871
Anguilla	1872
Anguilla	1873
Anguilla	1874
Anguilla	1875
Anguilla	1876
Anguilla	1877
Anguilla	1878
Anguilla	1879
Anguilla	1880	3160
Anguilla	1881
Anguilla	1882
Anguilla	1883
Anguilla	1884
Anguilla	1885
Anguilla	1886
Anguilla	1887
Anguilla	1888
Anguilla	1889
Anguilla	1890	3650
Anguilla	1891
Anguilla	1892
Anguilla	1893
Anguilla	1894
Anguilla	1895
Anguilla	1896
Anguilla	1897
Anguilla	1898
Anguilla	1899
Anguilla	1900	3980
Anguilla	1901
Anguilla	1902
Anguilla	1903
Anguilla	1904
Anguilla	1905
Anguilla	1906
Anguilla	1907
Anguilla	1908
Anguilla	1909
Anguilla	1910	4160
Anguilla	1911
Anguilla	1912
Anguilla	1913
Anguilla	1914
Anguilla	1915
Anguilla	1916
Anguilla	1917
Anguilla	1918
Anguilla	1919
Anguilla	1920	4187
Anguilla	1921
Anguilla	1922
Anguilla	1923
Anguilla	1924
Anguilla	1925
Anguilla	1926
Anguilla	1927
Anguilla	1928
Anguilla	1929
Anguilla	1930	4994
Anguilla	1931
Anguilla	1932
Anguilla	1933
Anguilla	1934
Anguilla	1935
Anguilla	1936
Anguilla	1937
Anguilla	1938
Anguilla	1939
Anguilla	1940	5533
Anguilla	1941
Anguilla	1942
Anguilla	1943
Anguilla	1944
Anguilla	1945
Anguilla	1946
Anguilla	1947
Anguilla	1948
Anguilla	1949
Anguilla	1950	5036
Anguilla	1951	5264
Anguilla	1952	5423
Anguilla	1953	5547
Anguilla	1954	5685
Anguilla	1955	5775
Anguilla	1956	5811
Anguilla	1957	5815
Anguilla	1958	5803
Anguilla	1959	5782
Anguilla	1960	5773
Anguilla	1961	5817
Anguilla	1962	5878
Anguilla	1963	5935
Anguilla	1964	5988
Anguilla	1965	6037
Anguilla	1966	6092
Anguilla	1967	6148
Anguilla	1968	6201
Anguilla	1969	6249
Anguilla	1970	6302
Anguilla	1971	6355
Anguilla	1972	6388
Anguilla	1973	6423
Anguilla	1974	6450
Anguilla	1975	6483
Anguilla	1976	6516
Anguilla	1977	6548
Anguilla	1978	6557
Anguilla	1979	6574
Anguilla	1980	6583
Anguilla	1981	6596
Anguilla	1982	6608
Anguilla	1983	6627
Anguilla	1984	6717
Anguilla	1985	6935
Anguilla	1986	7193
Anguilla	1987	7460
Anguilla	1988	7743
Anguilla	1989	8041
Anguilla	1990	8340	0.051
Anguilla	1991	8638	0.051
Anguilla	1992	8911	0.055
Anguilla	1993	9144	0.066
Anguilla	1994	9381	0.066
Anguilla	1995	9625	0.066
Anguilla	1996	9886	0.07
Anguilla	1997	10152	0.07
Anguilla	1998	10438	0.077
Anguilla	1999	10744	0.081
Anguilla	2000	11071	0.088
Anguilla	2001	11367	0.095
Anguilla	2002	11583	0.095
Anguilla	2003	11761	0.103
Anguilla	2004	11957	0.121
Anguilla	2005	12149	0.128
Anguilla	2006	12347	0.143
Anguilla	2007	12546	0.15
Anguilla	2008	12754	0.15
Anguilla	2009	12970	0.147
Anguilla	2010	13192	0.15
Anguilla	2011	13363	0.143
Anguilla	2012	13479	0.143
Anguilla	2013	13727	0.117
Anguilla	2014	14143	0.139
Anguilla	2015	14554	0.154
Anguilla	2016	14842	0.154
Anguilla	2017	15040	0.143
Anguilla	2018	15201	0.143
Anguilla	2019	15408	0.154
Anguilla	2020	15612	0.131
Anguilla	2021	15779	0.145
Antarctica	1851
Antarctica	1852
Antarctica	1853
Antarctica	1854
Antarctica	1855
Antarctica	1856
Antarctica	1857
Antarctica	1858
Antarctica	1859
Antarctica	1860
Antarctica	1861
Antarctica	1862
Antarctica	1863
Antarctica	1864
Antarctica	1865
Antarctica	1866
Antarctica	1867
Antarctica	1868
Antarctica	1869
Antarctica	1870
Antarctica	1871
Antarctica	1872
Antarctica	1873
Antarctica	1874
Antarctica	1875
Antarctica	1876
Antarctica	1877
Antarctica	1878
Antarctica	1879
Antarctica	1880
Antarctica	1881
Antarctica	1882
Antarctica	1883
Antarctica	1884
Antarctica	1885
Antarctica	1886
Antarctica	1887
Antarctica	1888
Antarctica	1889
Antarctica	1890
Antarctica	1891
Antarctica	1892
Antarctica	1893
Antarctica	1894
Antarctica	1895
Antarctica	1896
Antarctica	1897
Antarctica	1898
Antarctica	1899
Antarctica	1900
Antarctica	1901
Antarctica	1902
Antarctica	1903
Antarctica	1904
Antarctica	1905
Antarctica	1906
Antarctica	1907
Antarctica	1908
Antarctica	1909
Antarctica	1910
Antarctica	1911
Antarctica	1912
Antarctica	1913
Antarctica	1914
Antarctica	1915
Antarctica	1916
Antarctica	1917
Antarctica	1918
Antarctica	1919
Antarctica	1920
Antarctica	1921
Antarctica	1922
Antarctica	1923
Antarctica	1924
Antarctica	1925
Antarctica	1926
Antarctica	1927
Antarctica	1928
Antarctica	1929
[truncated: 48,599 more rows]
